# Supplementary material for: Организация практической подготовки по офтальмохирургии на последипломном уровне в Оренбургской государственной медицинской академии
Source: MDPI journal article supplement (doi:10.3390/ph14111109), 2014-01-01

## Supplementary Information

# Synthesis and Structure-Activity Relationships of new 2-Phenoxybenzamides with Antiplasmodial Activity

Theresa Hermann <sup>1</sup>, Patrick Hochegger <sup>1</sup>, Johanna Dolensky <sup>1</sup>, Werner Seebacher <sup>1</sup>, Eva-Maria Pferschy-Wenzig <sup>2</sup>, Robert Saf <sup>3</sup>, Marcel Kaiser <sup>4, 5</sup>, Pascal Mäser <sup>4, 5</sup> and Robert Weis <sup>1, \*</sup>

<sup>1</sup> Institute of Pharmaceutical Sciences, Pharmaceutical Chemistry, University of Graz, Schubertstraße 1, A-8010 Graz, Austria; theresa.hermann@uni-graz.at (T.H.); patrick.hochegger@uni-graz.at (P.H.); johanna.faist@uni-graz.at (J.D.); we.seebacher@uni-graz.at (W.S.)

<sup>2</sup> Institute of Pharmaceutical Sciences, Pharmacognosy, University of Graz, Beethovenstraße 8, A-8010, Graz, Austria; eva-maria.wenzig@uni-graz.at (E.P.-W.)

<sup>3</sup> Institute for Chemistry and Technology of Materials (ICTM), Graz University of Technology, Stremayrgasse 9, A-8010 Graz, Austria; robert.saf@tugraz.at (R.S.)

<sup>4</sup> Swiss Tropical and Public Health Institute, Socinstraße 57, CH-4002 Basel, Switzerland; marcel.kaiser@swisstph.ch (M.K.); pascal.maeser@swisstph.ch (P.M.)

<sup>5</sup> University of Basel, Petersplatz 1, CH-4001, Basel, Switzerland

\* Correspondence: robert.weis@uni-graz.at; Tel.: +43-316-380-5379; Fax: +43-316-380-9846

---

**NMR spectra data of compounds 1, 2, 6-9, 11-14, 17-22, 24-28, 31, 33-39, 42, 43, 47 and 49-56**

**Figure S1.**  $^1\text{H}$  NMR at 400 MHz and  $^{13}\text{C}$  NMR at 100 MHz spectra for compound **1**

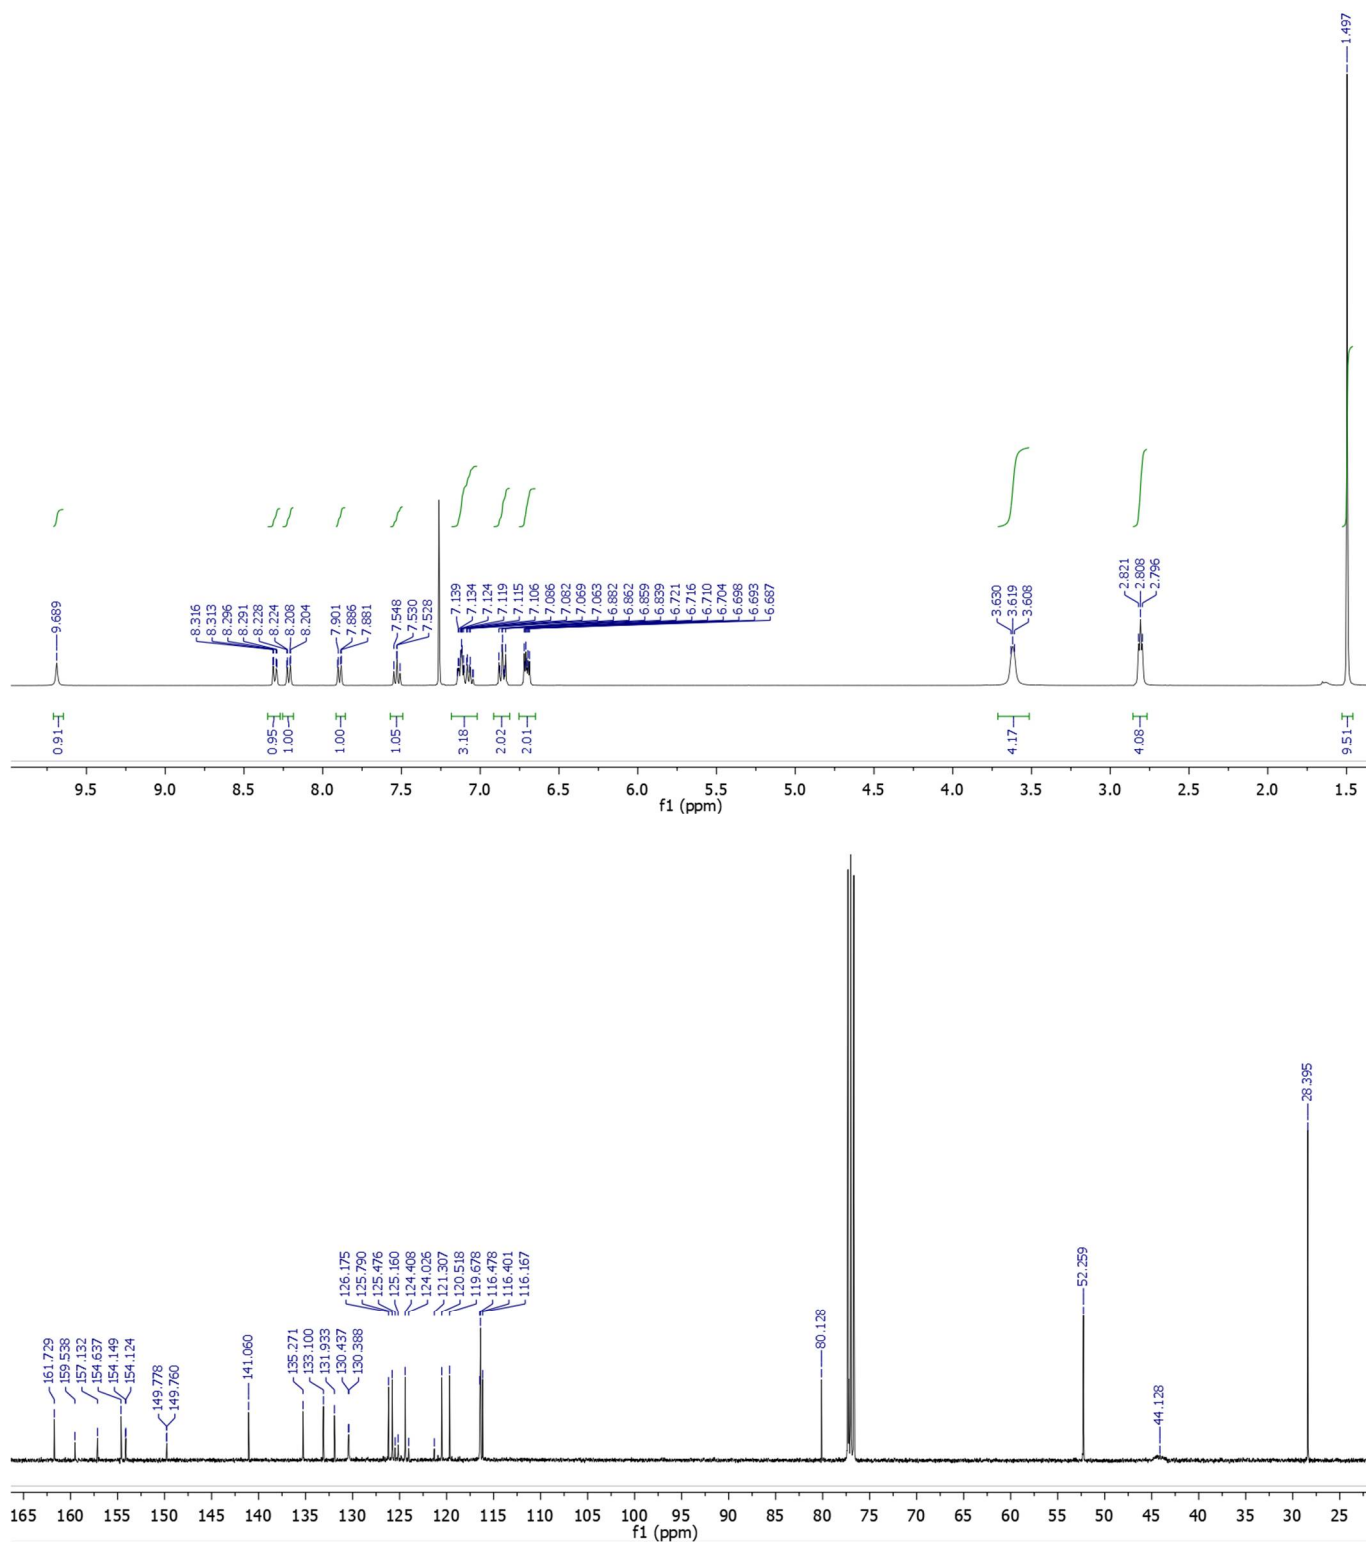

Figure S2. <sup>1</sup>H NMR at 400 MHz and <sup>13</sup>C NMR at 100 MHz spectra for compound 2

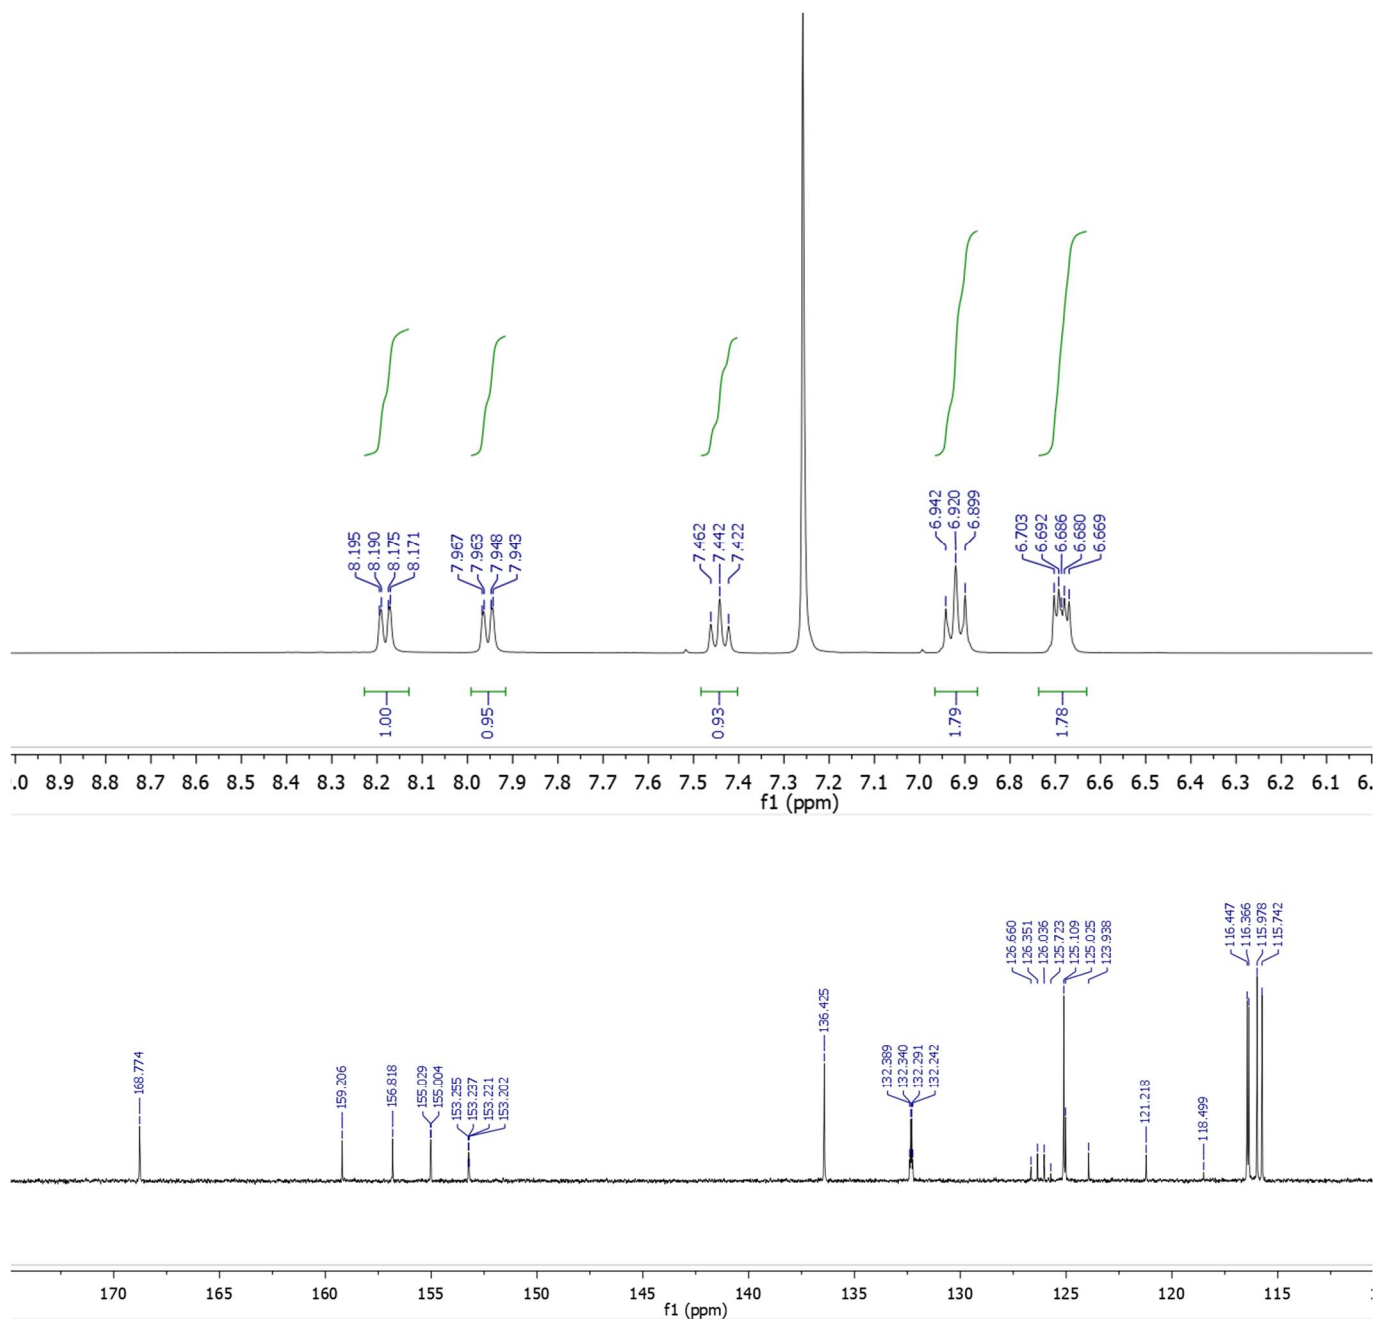

Figure S3. <sup>1</sup>H NMR at 400 MHz and <sup>13</sup>C NMR at 100 MHz spectra for compound 6

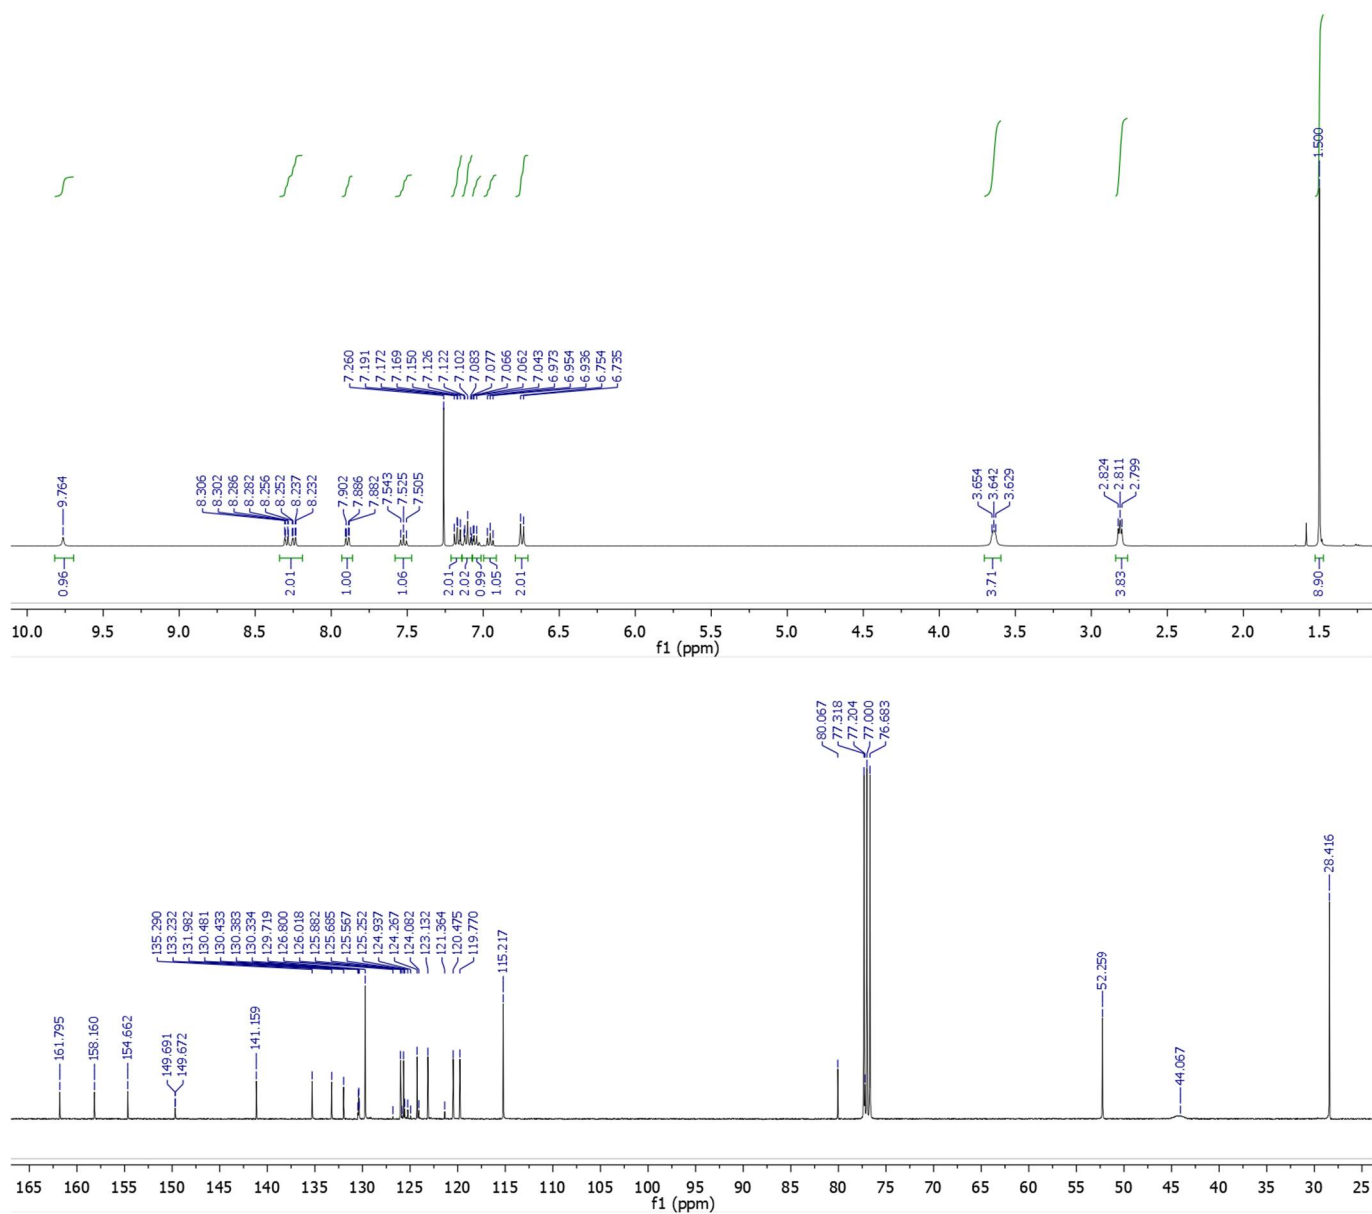

Figure S4. <sup>1</sup>H NMR at 400 MHz and <sup>13</sup>C NMR at 100 MHz spectra for compound 7

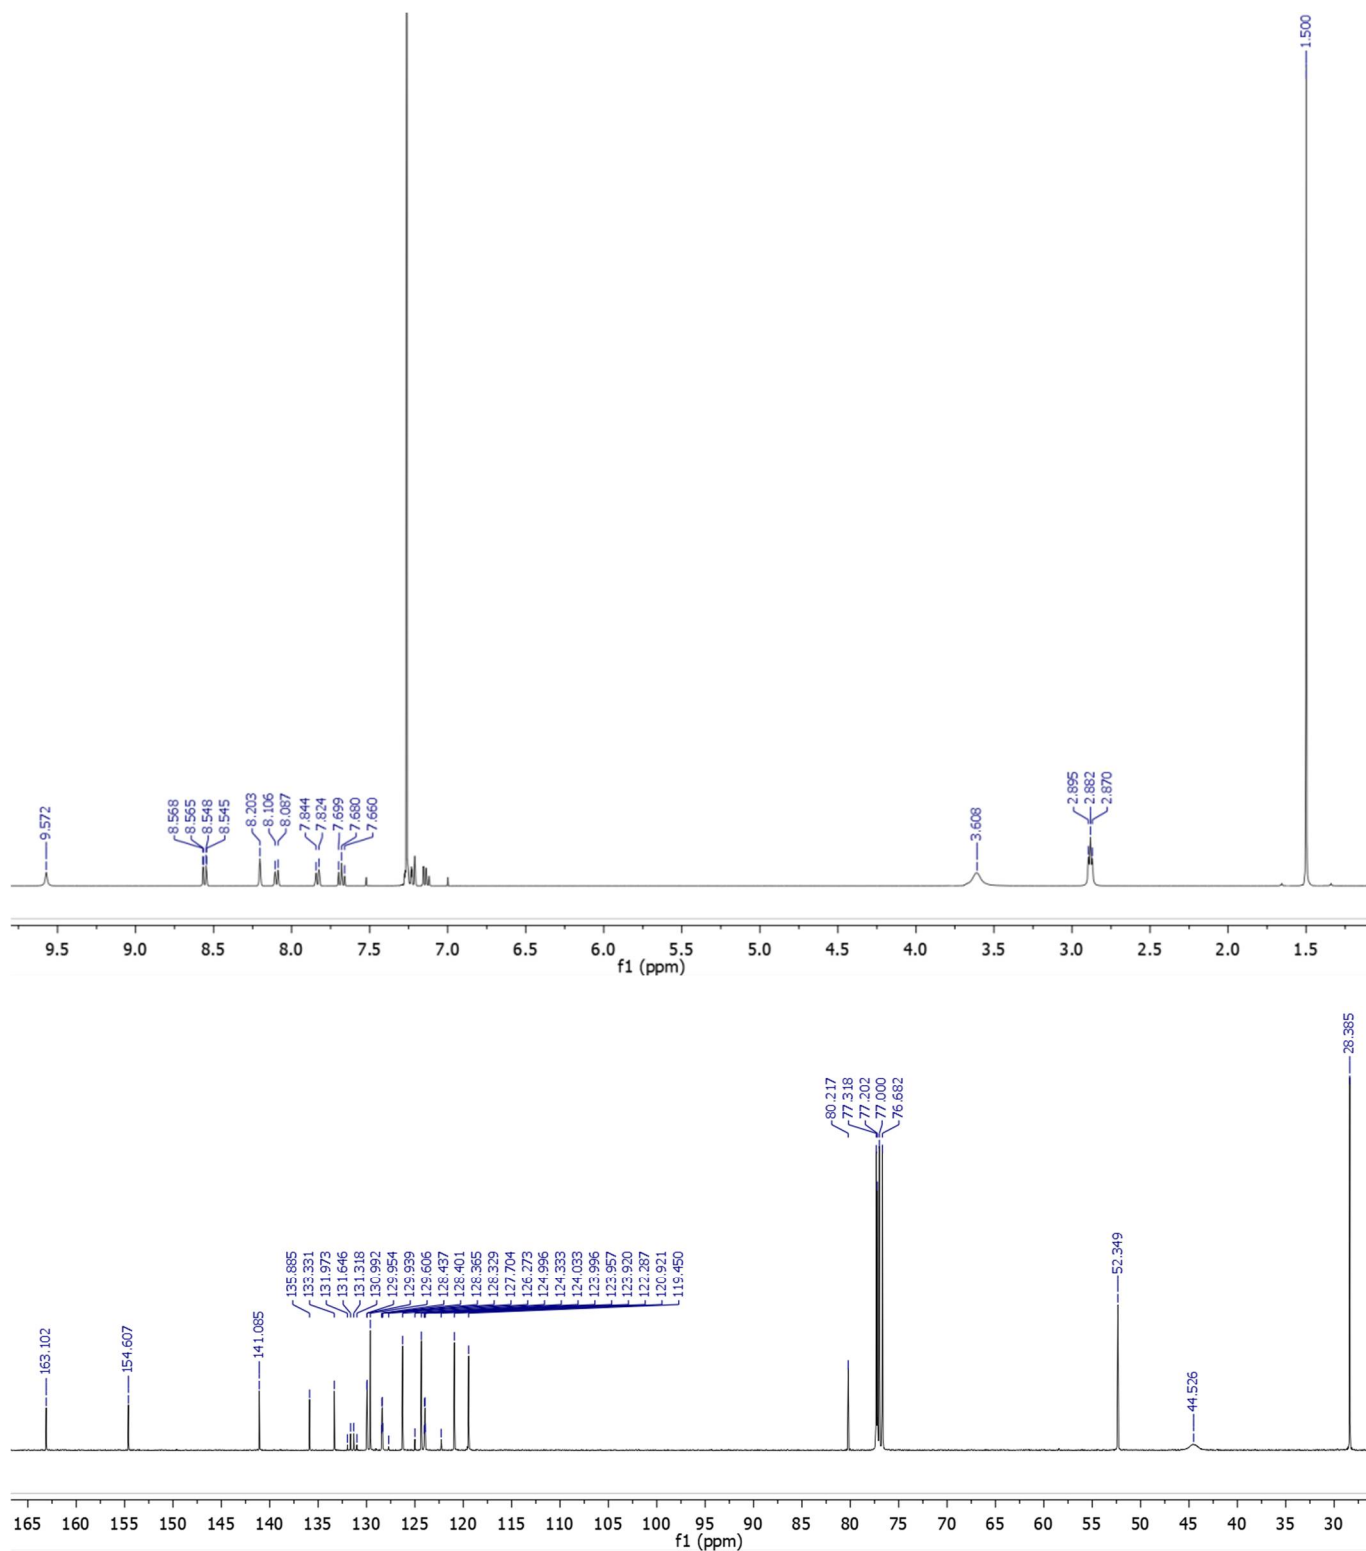

Figure S5. <sup>1</sup>H NMR at 400 MHz and <sup>13</sup>C NMR at 100 MHz spectra for compound 8

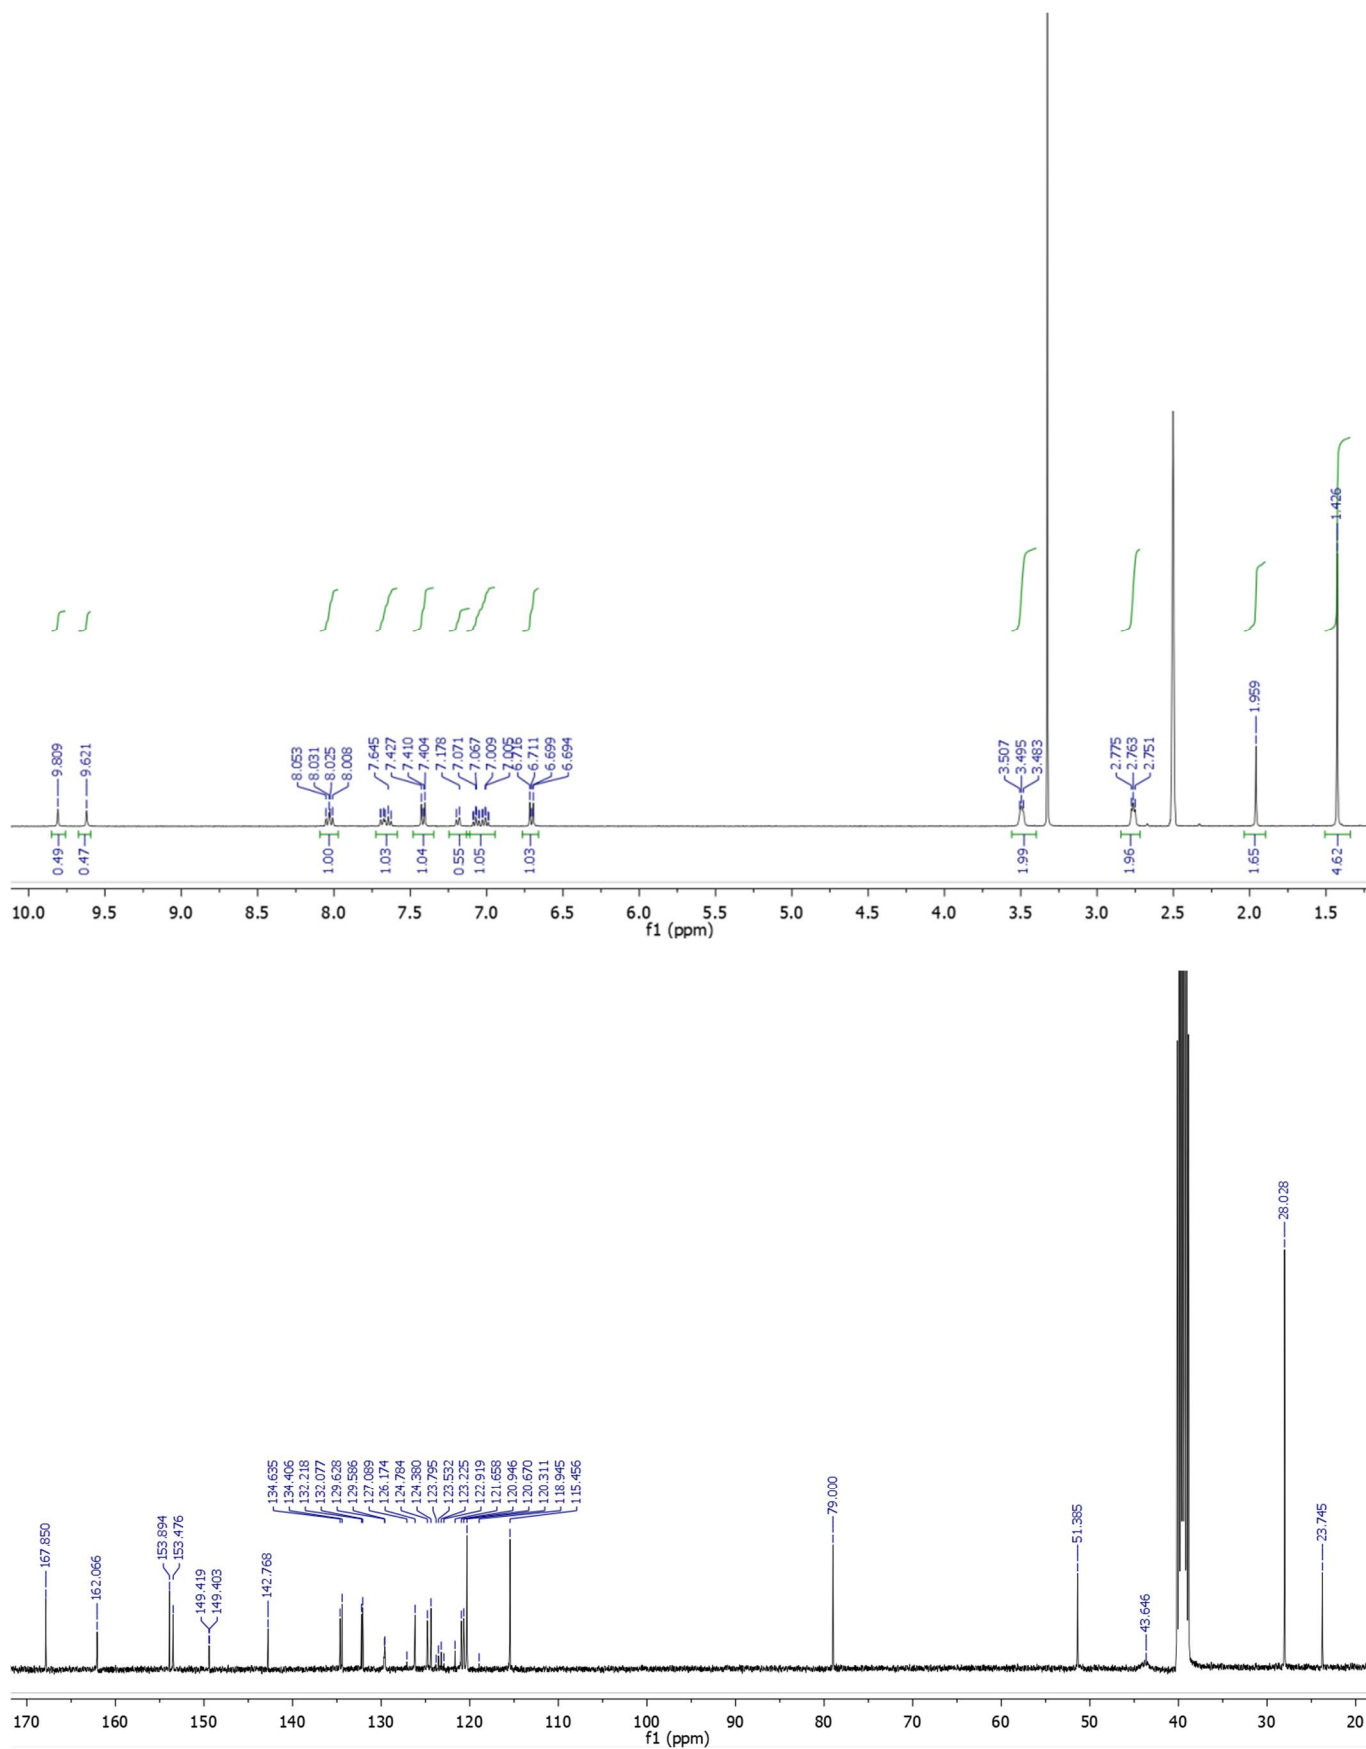

Figure S6. <sup>1</sup>H NMR at 400 MHz and <sup>13</sup>C NMR at 100 MHz spectra for compound 9

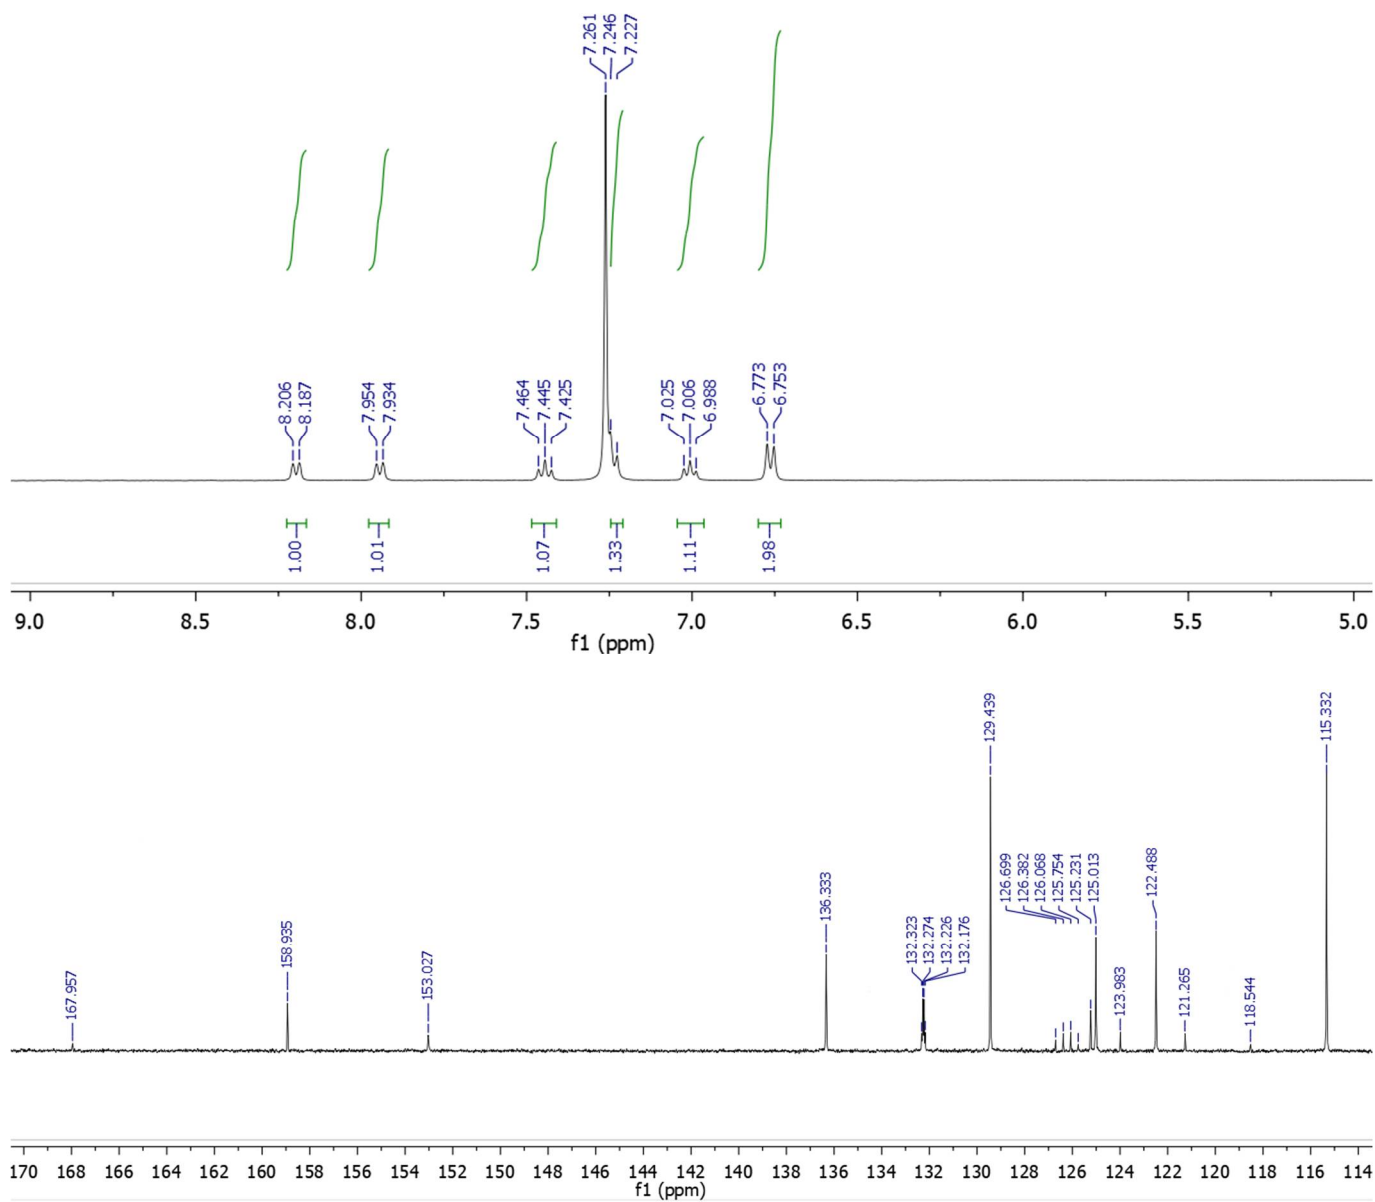

Figure S7. <sup>1</sup>H NMR at 400 MHz and <sup>13</sup>C NMR at 100 MHz spectra for compound **11**

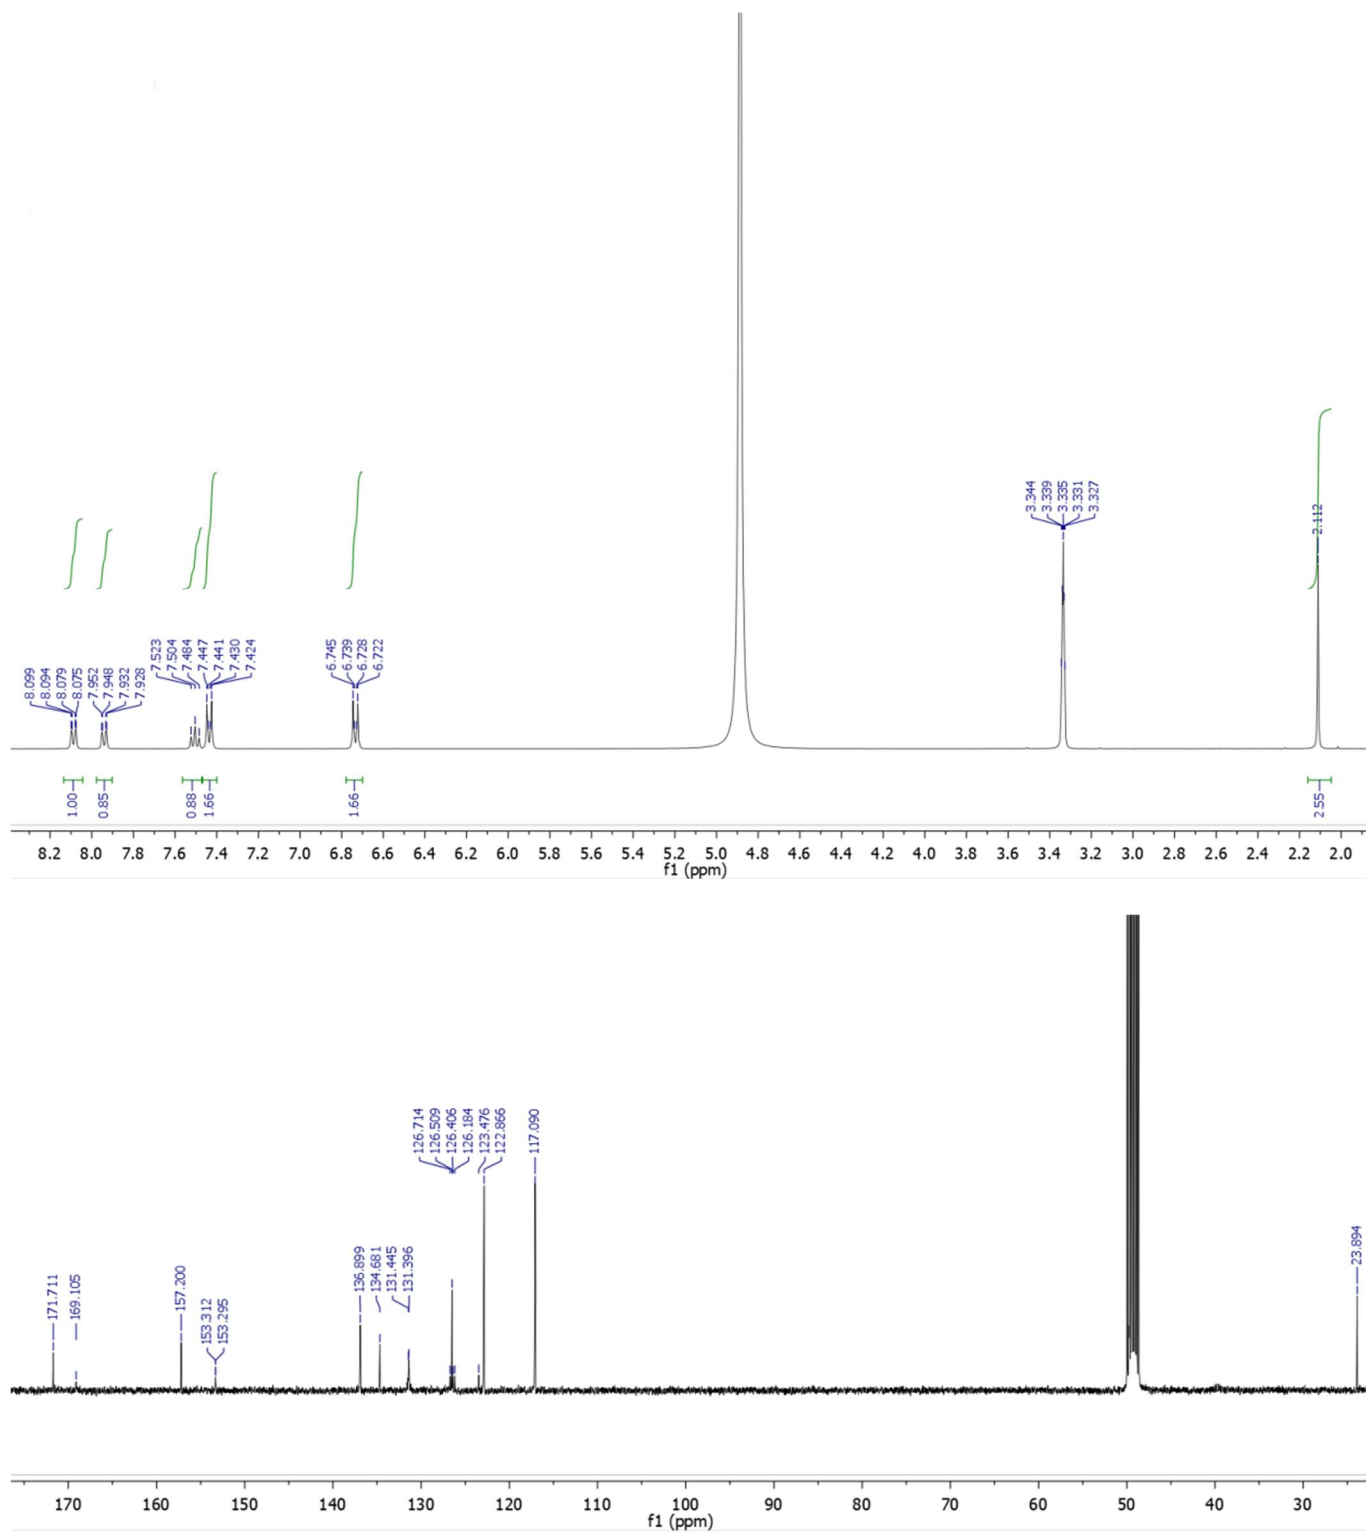



**Figure S8.**  $^1\text{H}$  NMR at 400 MHz and  $^{13}\text{C}$  NMR at 100 MHz spectra for compound **12**

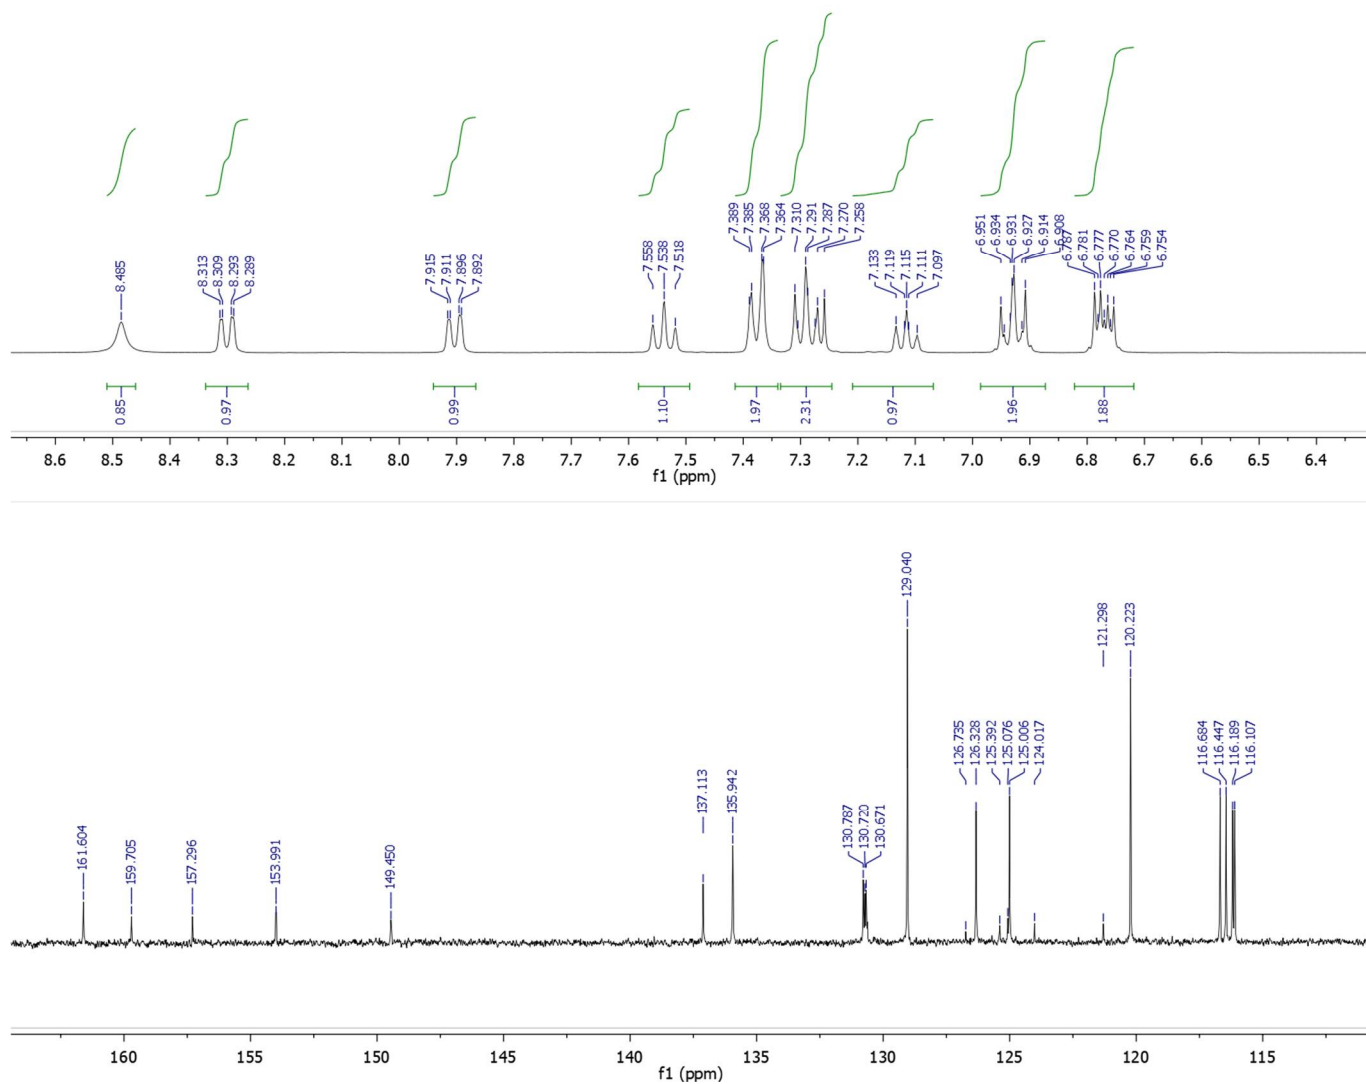

Figure S9. <sup>1</sup>H NMR at 400 MHz and <sup>13</sup>C NMR at 100 MHz spectra for compound 13

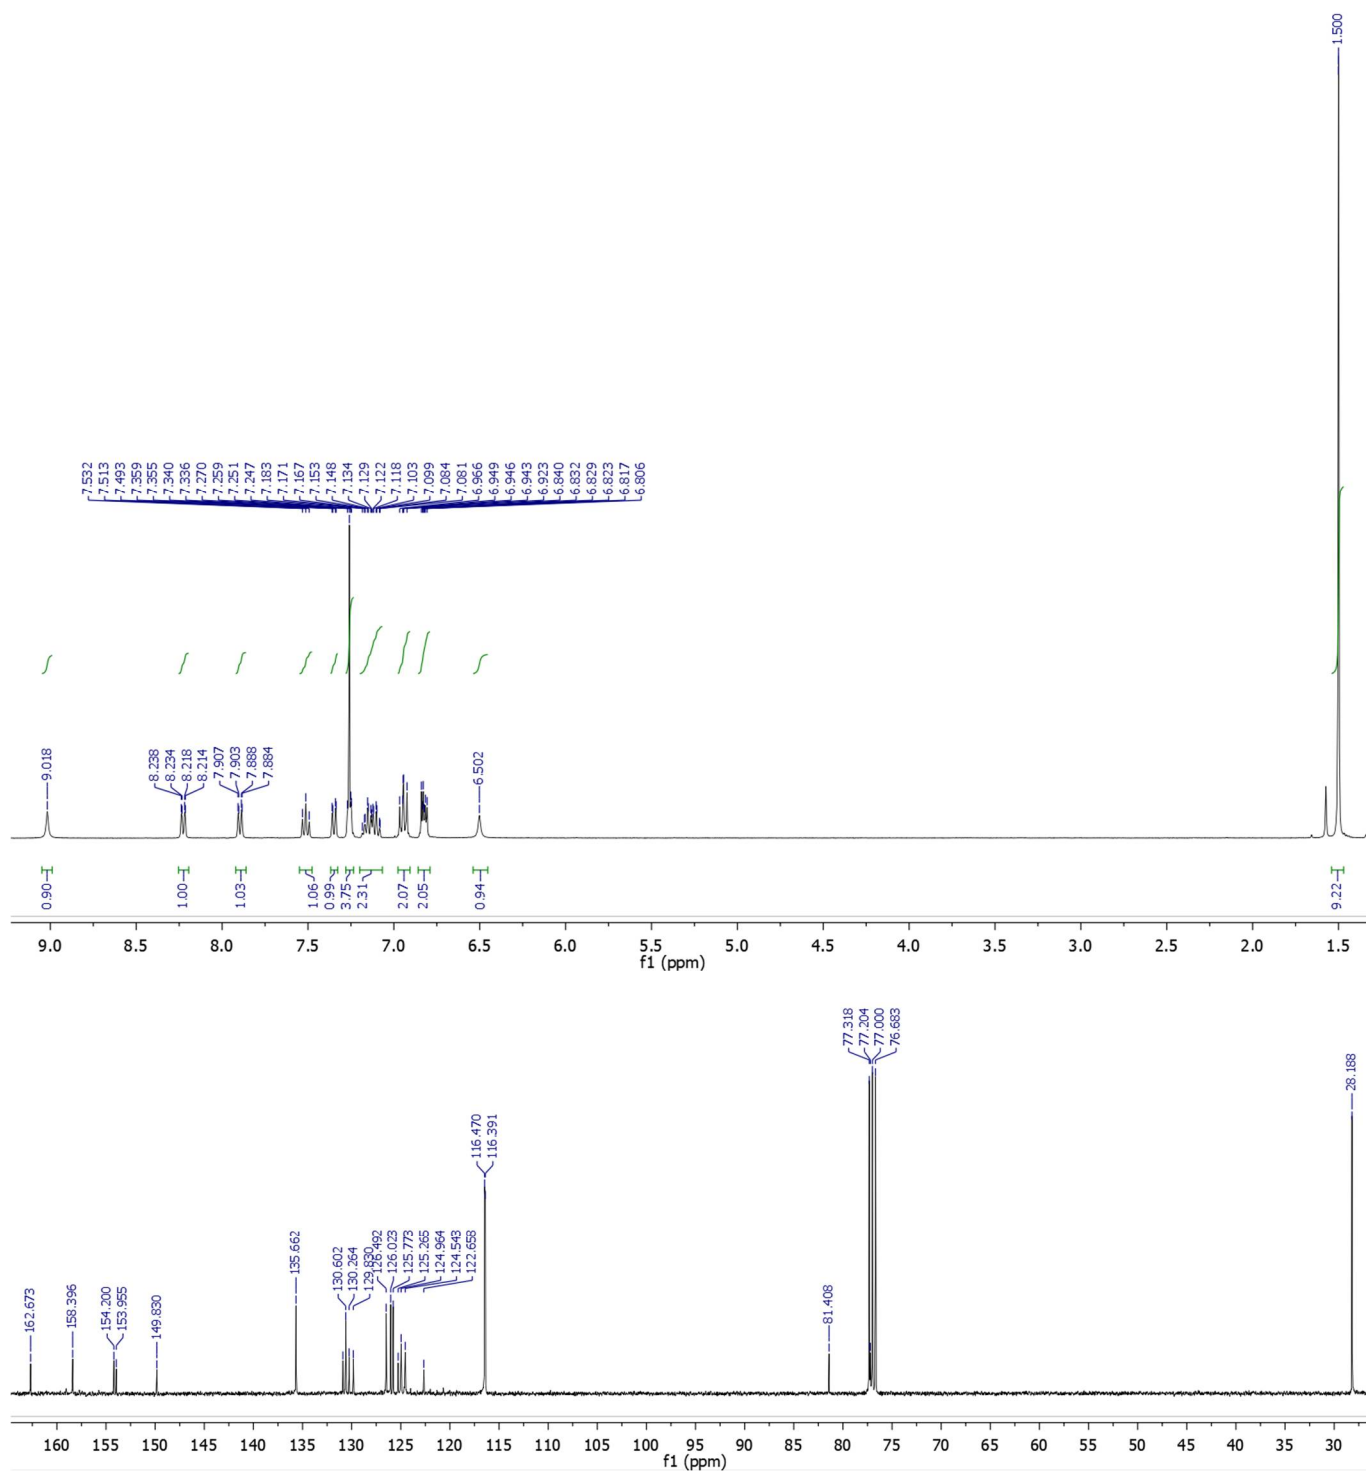

**Figure S10.**  $^1\text{H}$  NMR at 400 MHz and  $^{13}\text{C}$  NMR at 100 MHz spectra for compound **14**

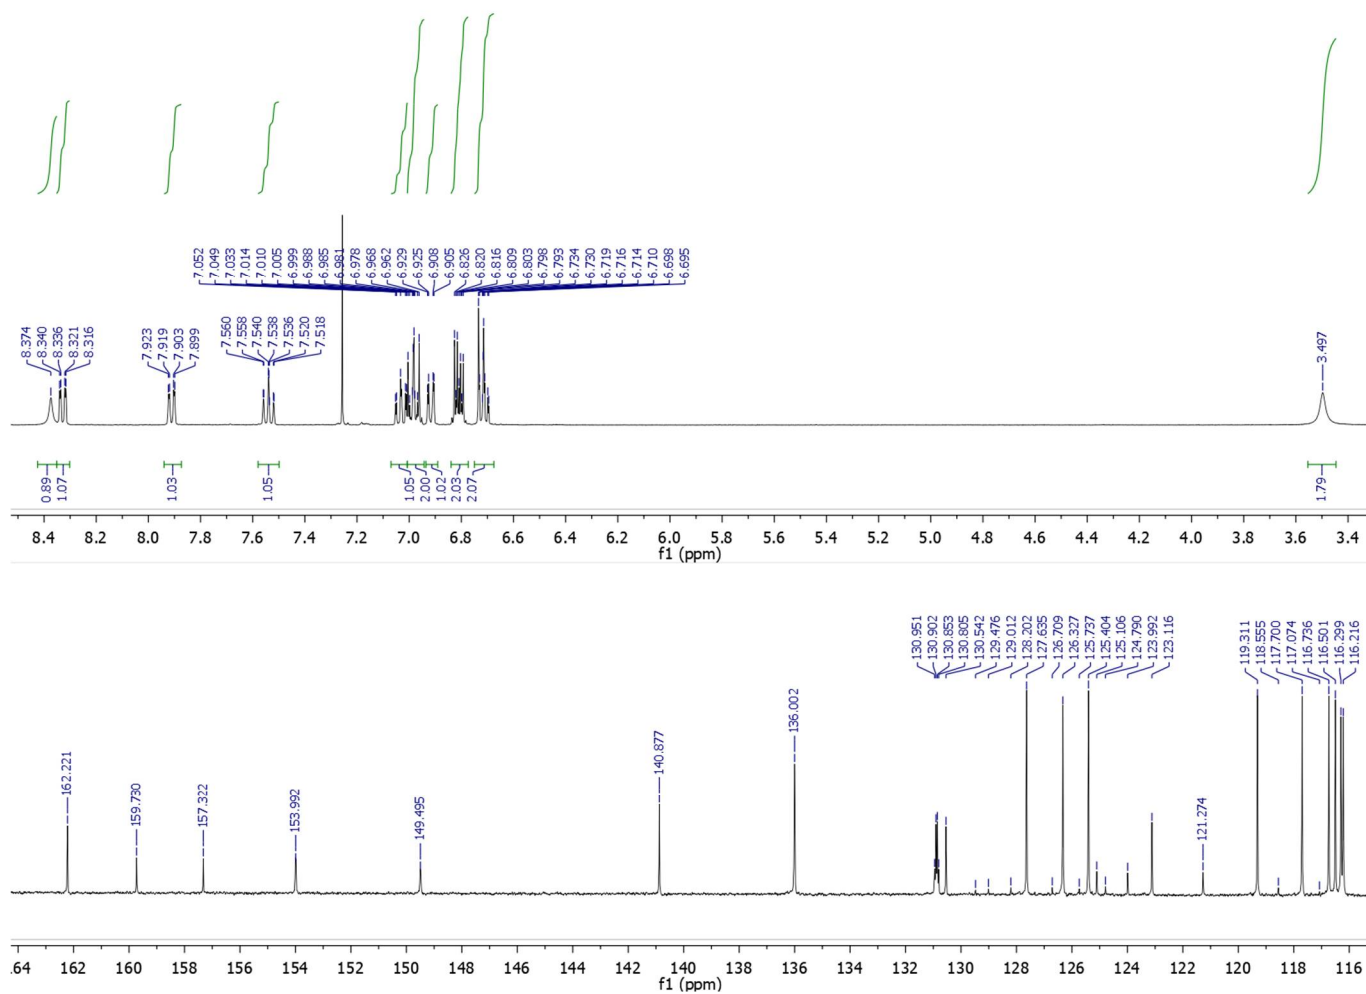

Figure S11. <sup>1</sup>H NMR at 400 MHz and <sup>13</sup>C NMR at 100 MHz spectra for compound 17

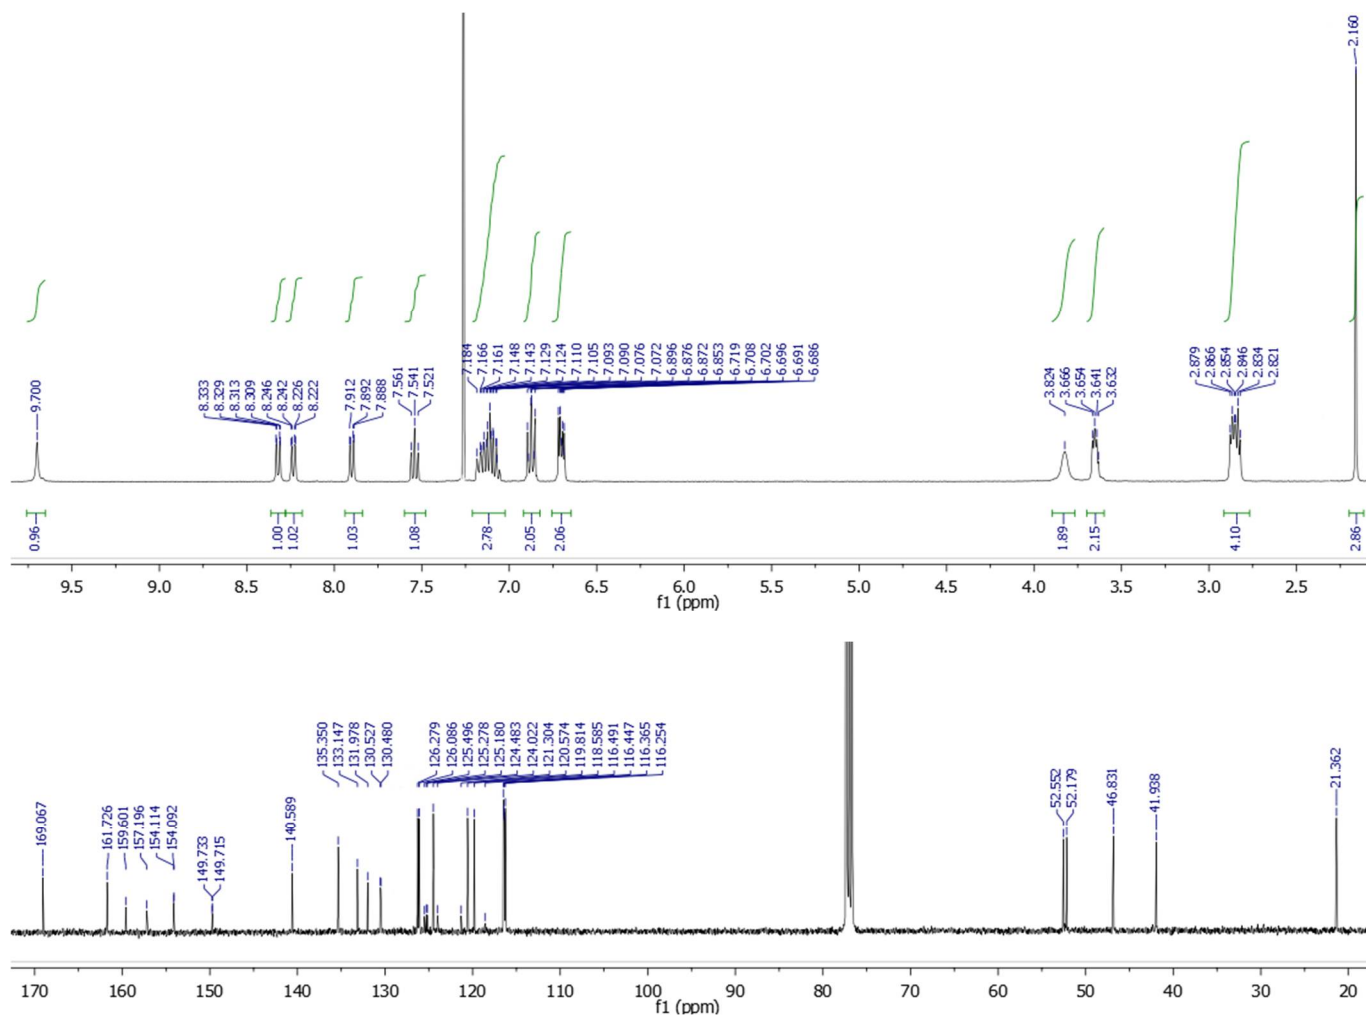

**Figure S12.**  $^1\text{H}$  NMR at 400 MHz and  $^{13}\text{C}$  NMR at 100 MHz spectra for compound **18**

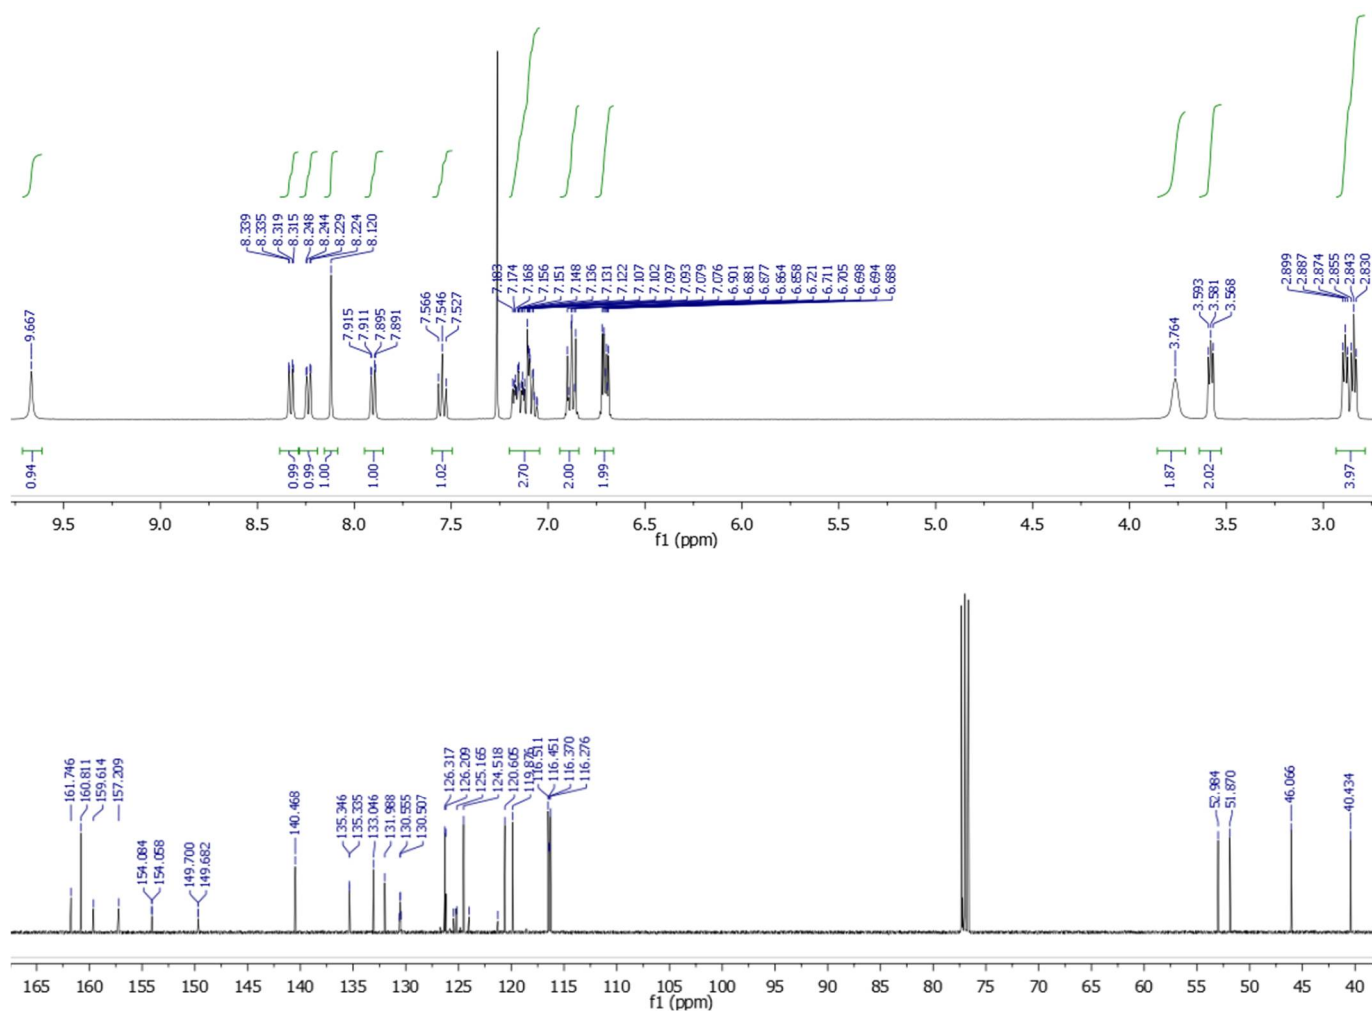

Figure S13. <sup>1</sup>H NMR at 400 MHz and <sup>13</sup>C NMR at 100 MHz spectra for compound **19**

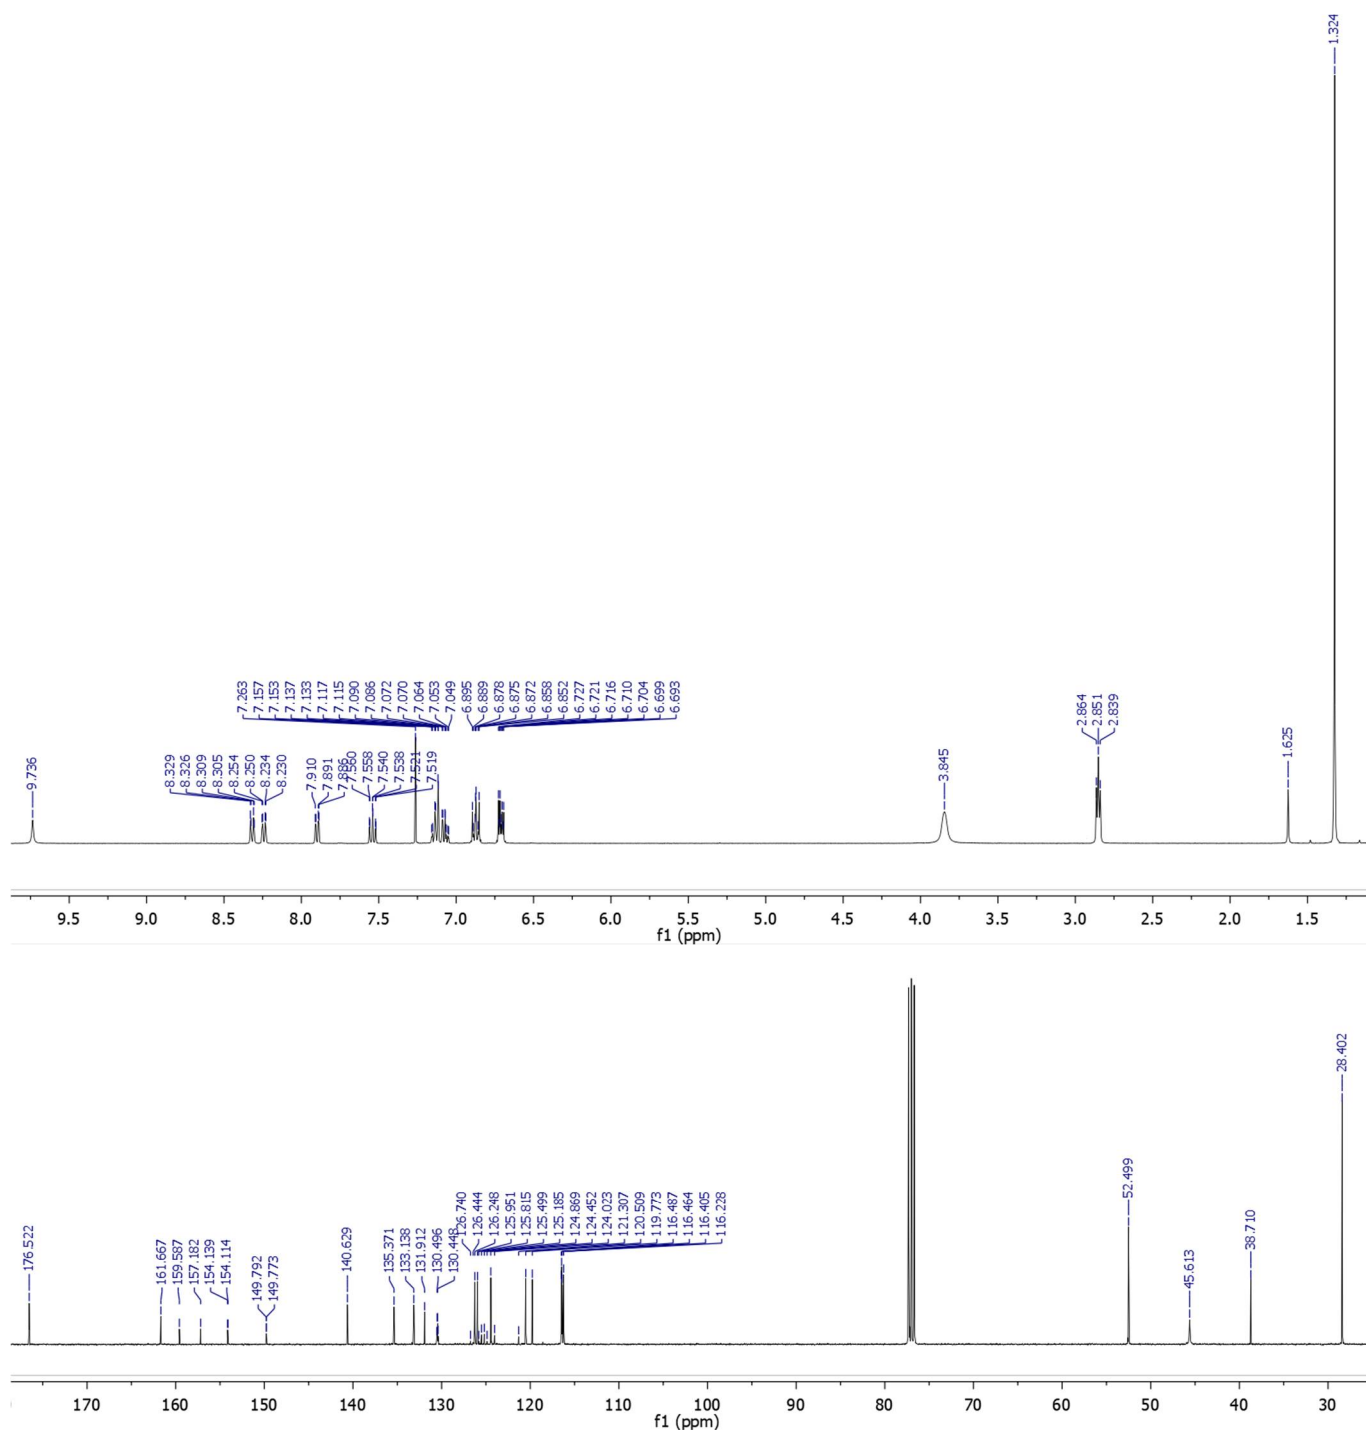

Figure S14. <sup>1</sup>H NMR at 400 MHz and <sup>13</sup>C NMR at 100 MHz spectra for compound 20

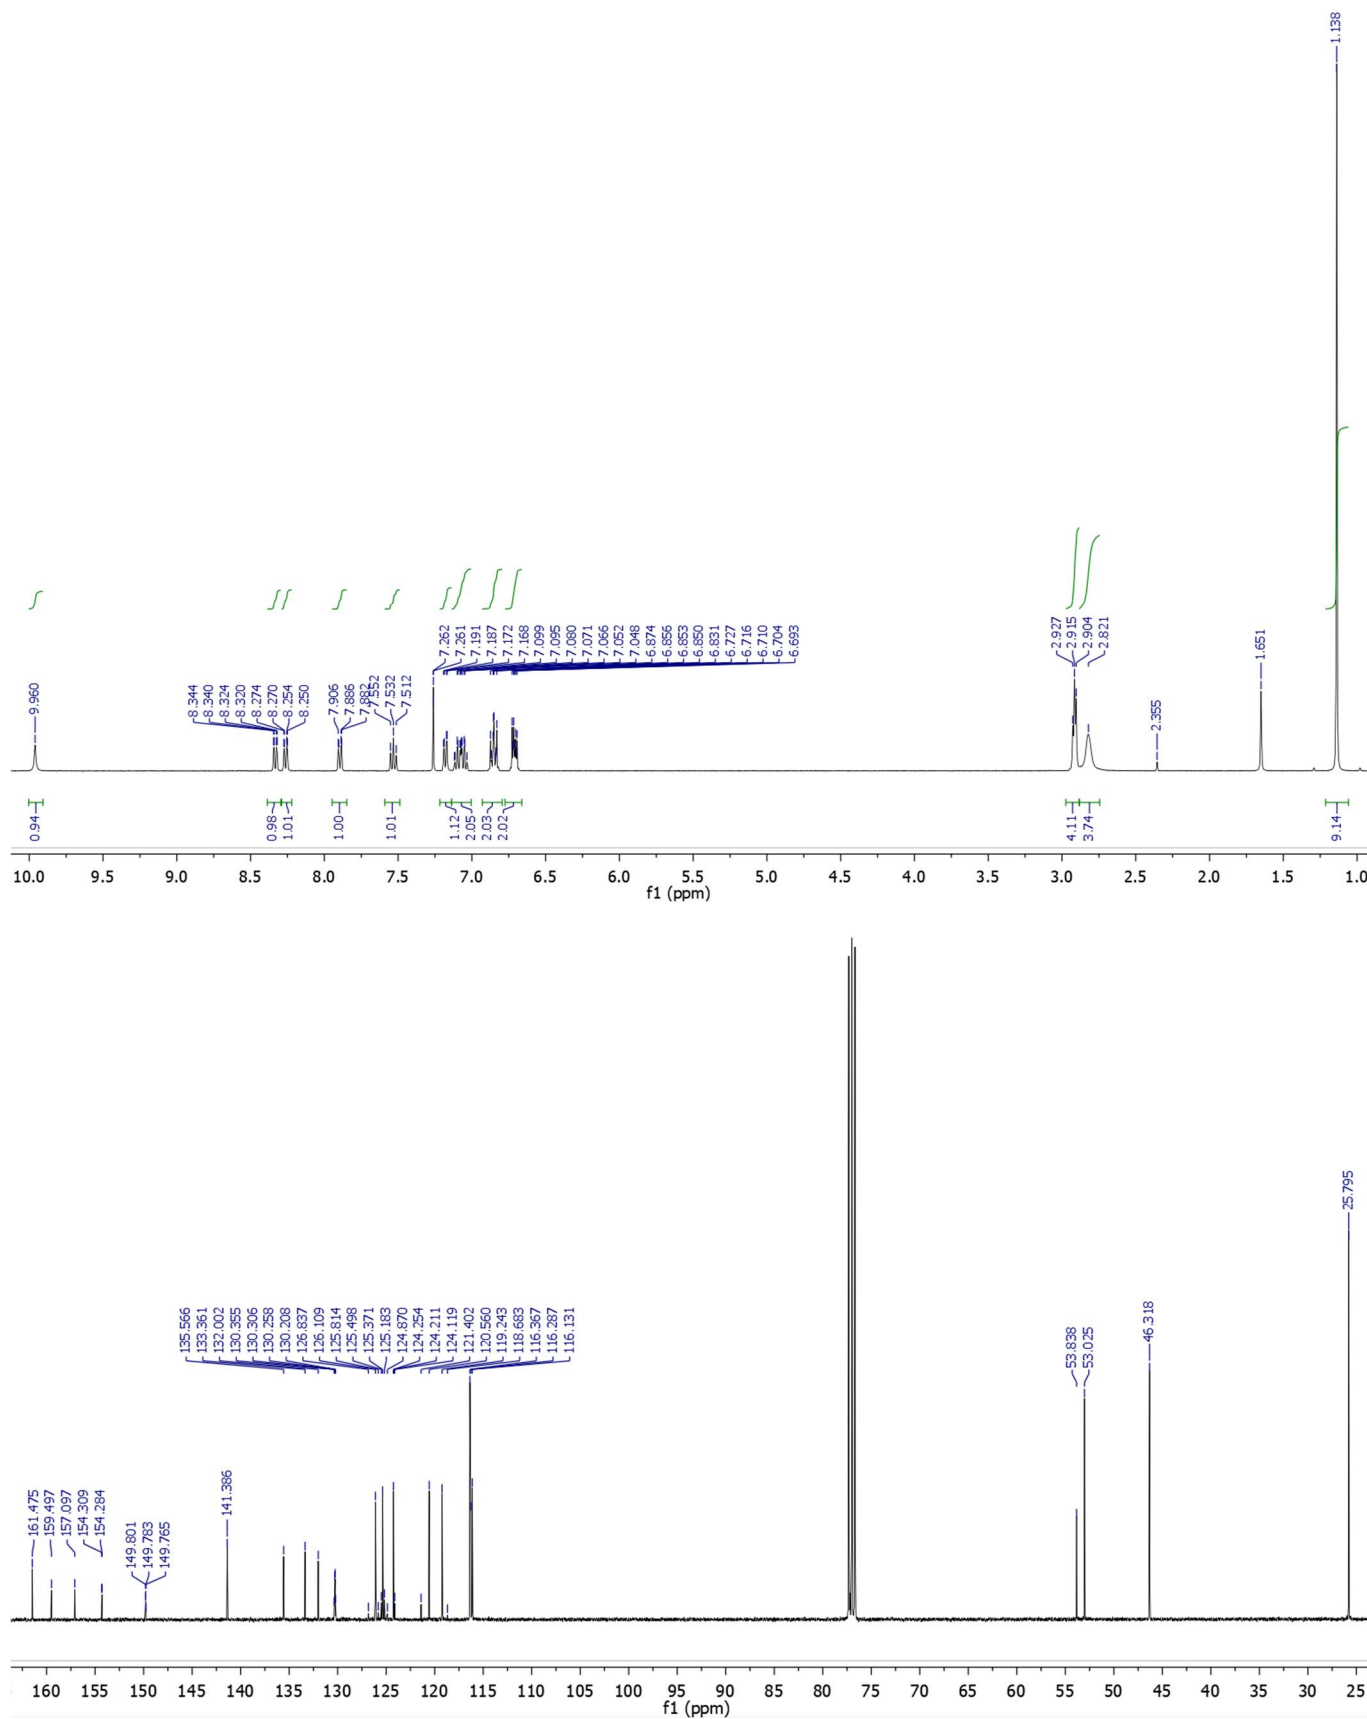

Figure S15. <sup>1</sup>H NMR at 400 MHz and <sup>13</sup>C NMR at 100 MHz spectra for compound 21

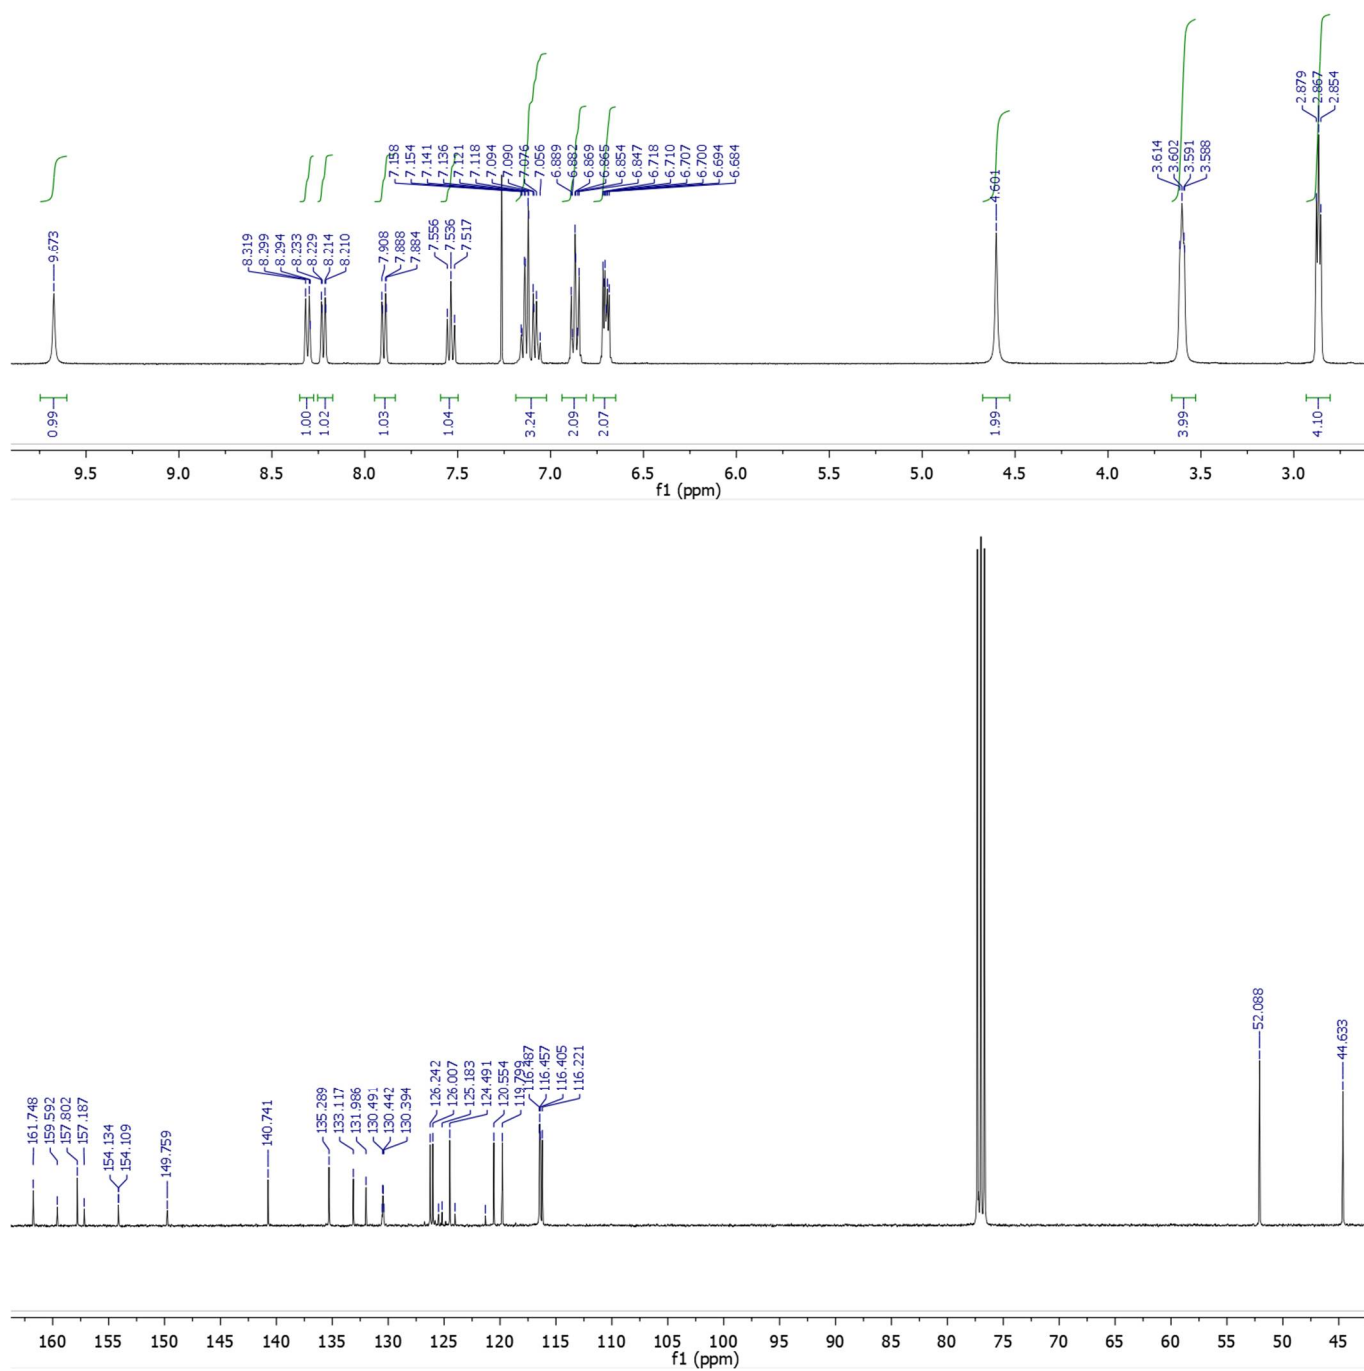



**Figure S16.**  $^1\text{H}$  NMR at 400 MHz and  $^{13}\text{C}$  NMR at 100 MHz spectra for compound **22**

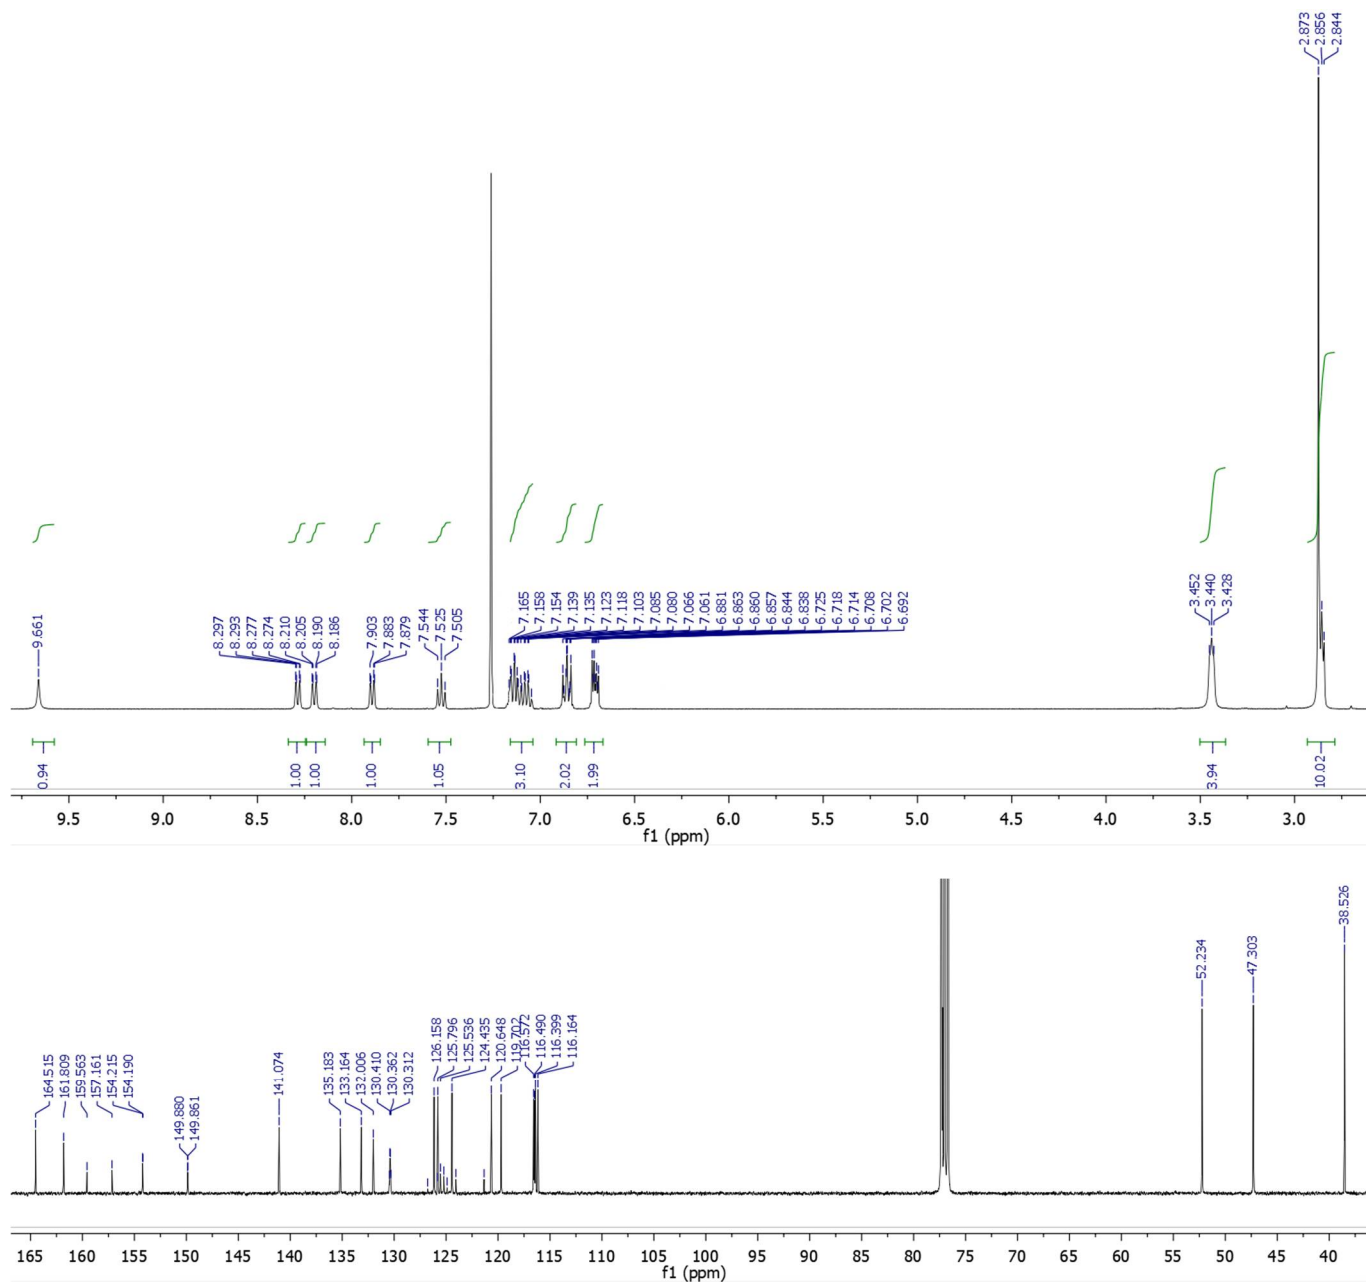

Figure S17. <sup>1</sup>H NMR at 400 MHz and <sup>13</sup>C NMR at 100 MHz spectra for compound 24

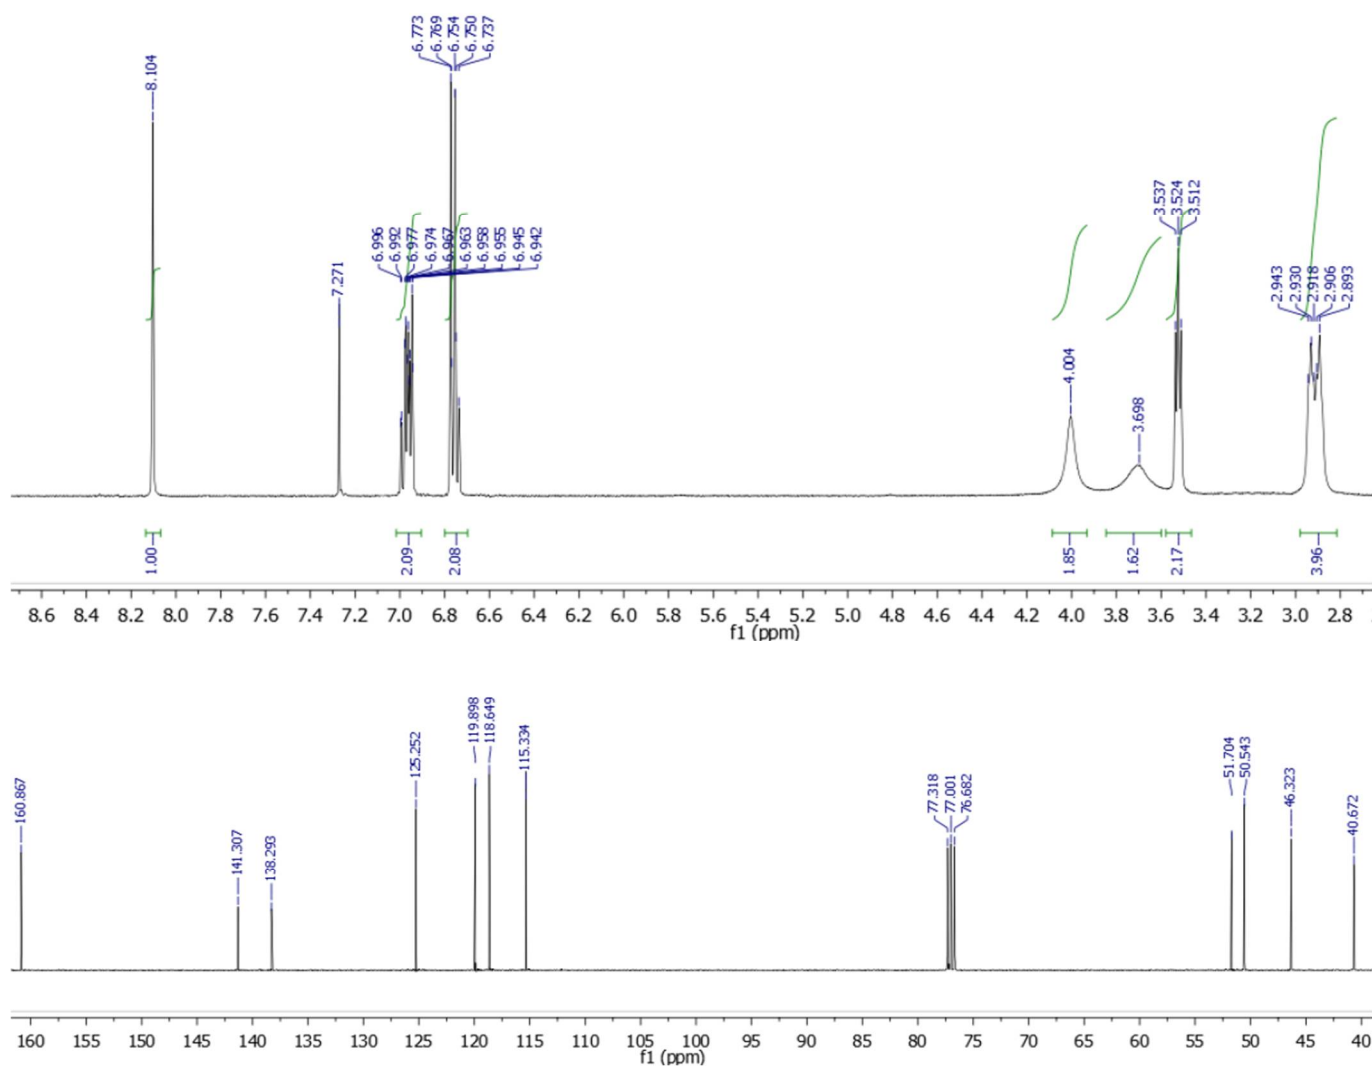

**Figure S18.**  $^1\text{H}$  NMR at 400 MHz and  $^{13}\text{C}$  NMR at 100 MHz spectra for compound **25**

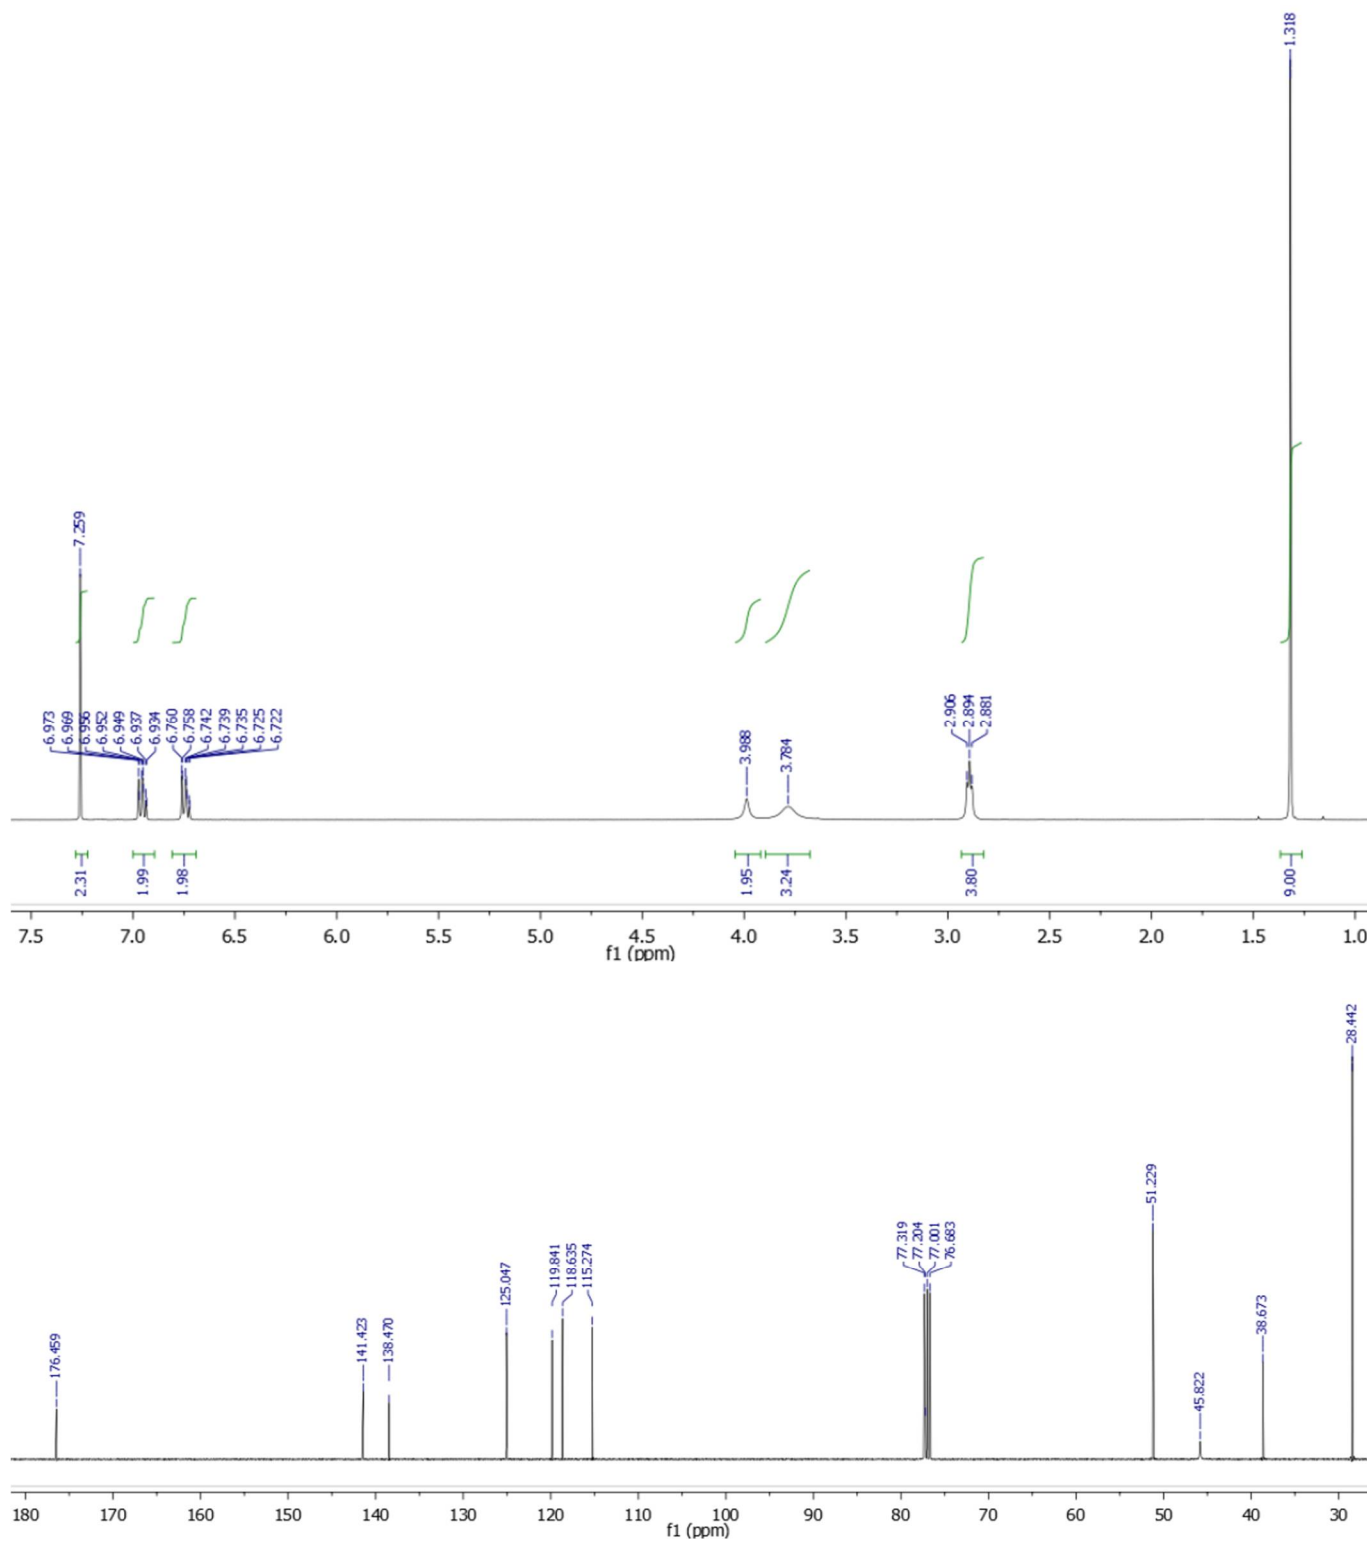

Figure S19.  $^1\text{H}$  NMR at 400 MHz and  $^{13}\text{C}$  NMR at 100 MHz spectra for compound **26**

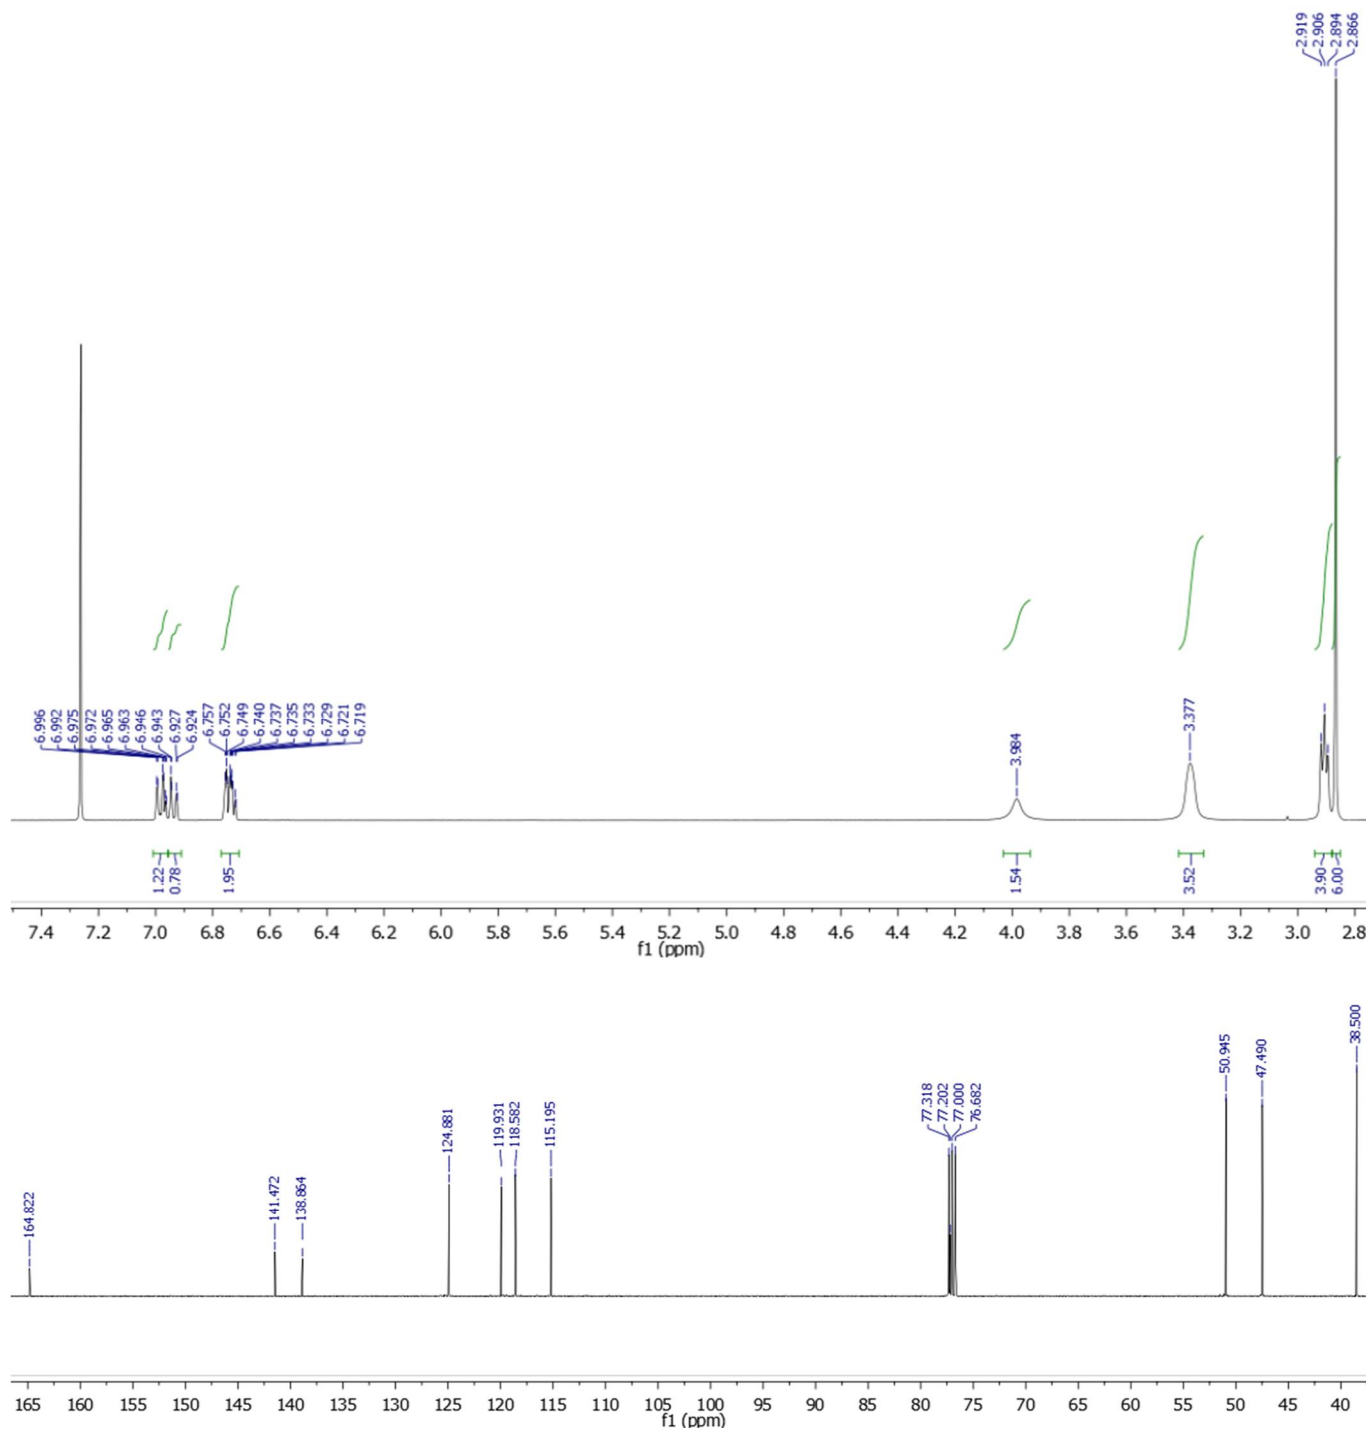

Figure S20.  $^1\text{H}$  NMR at 400 MHz and  $^{13}\text{C}$  NMR at 100 MHz spectra for compound 27

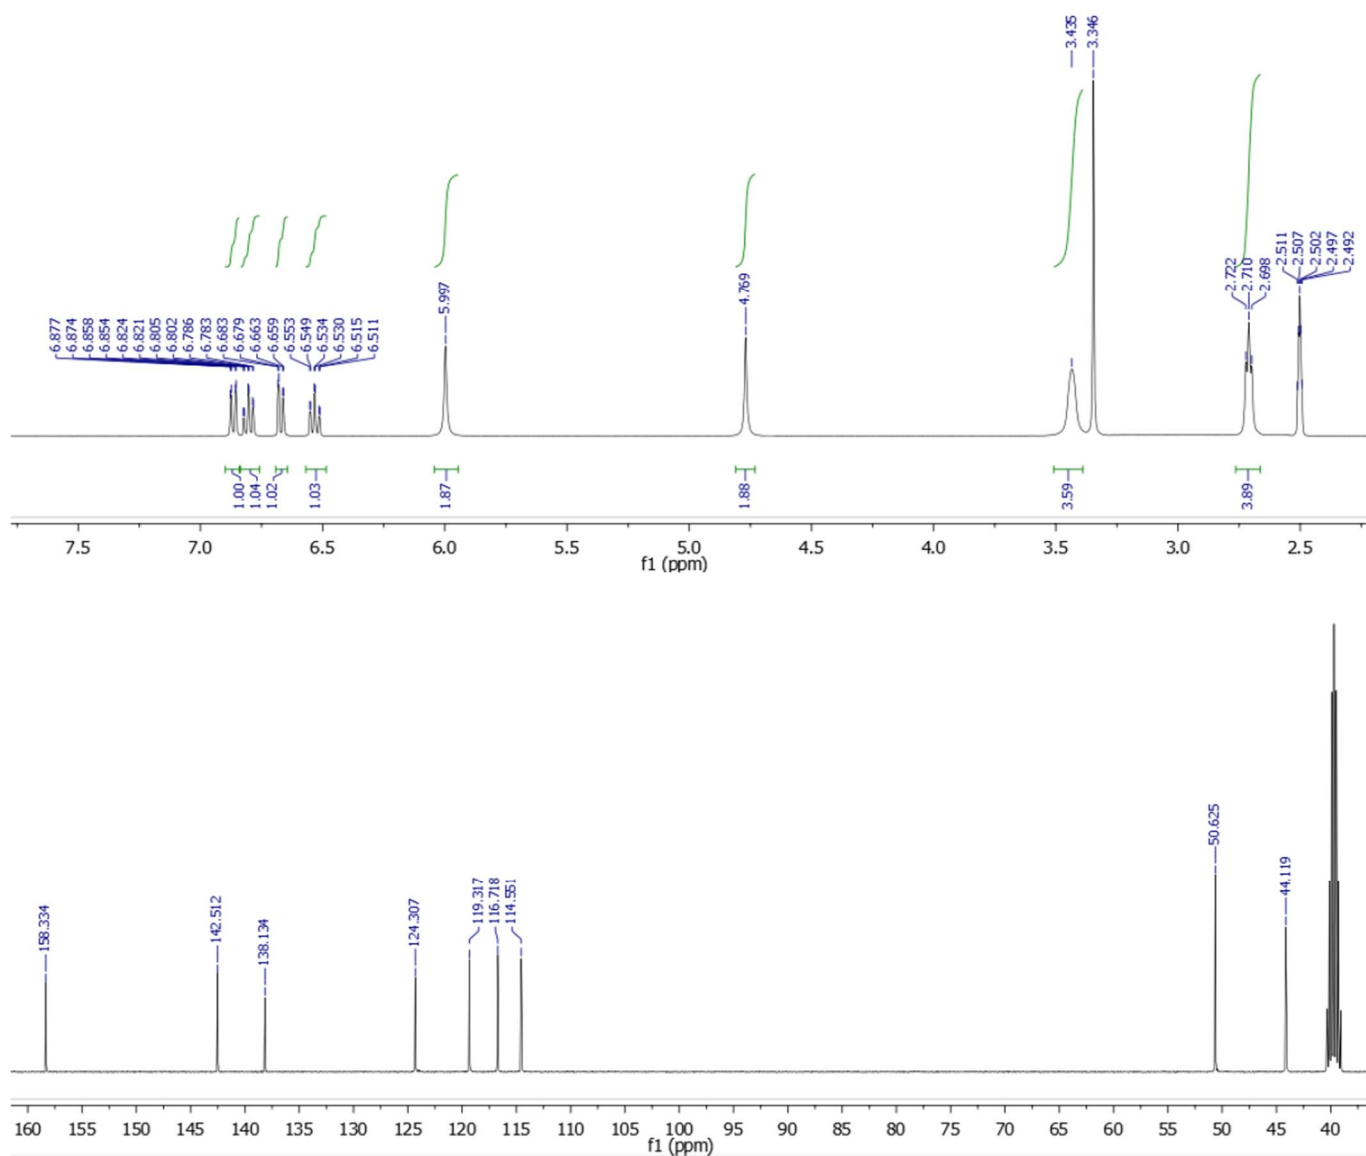

Figure S21. <sup>1</sup>H NMR at 400 MHz and <sup>13</sup>C NMR at 100 MHz spectra for compound 28

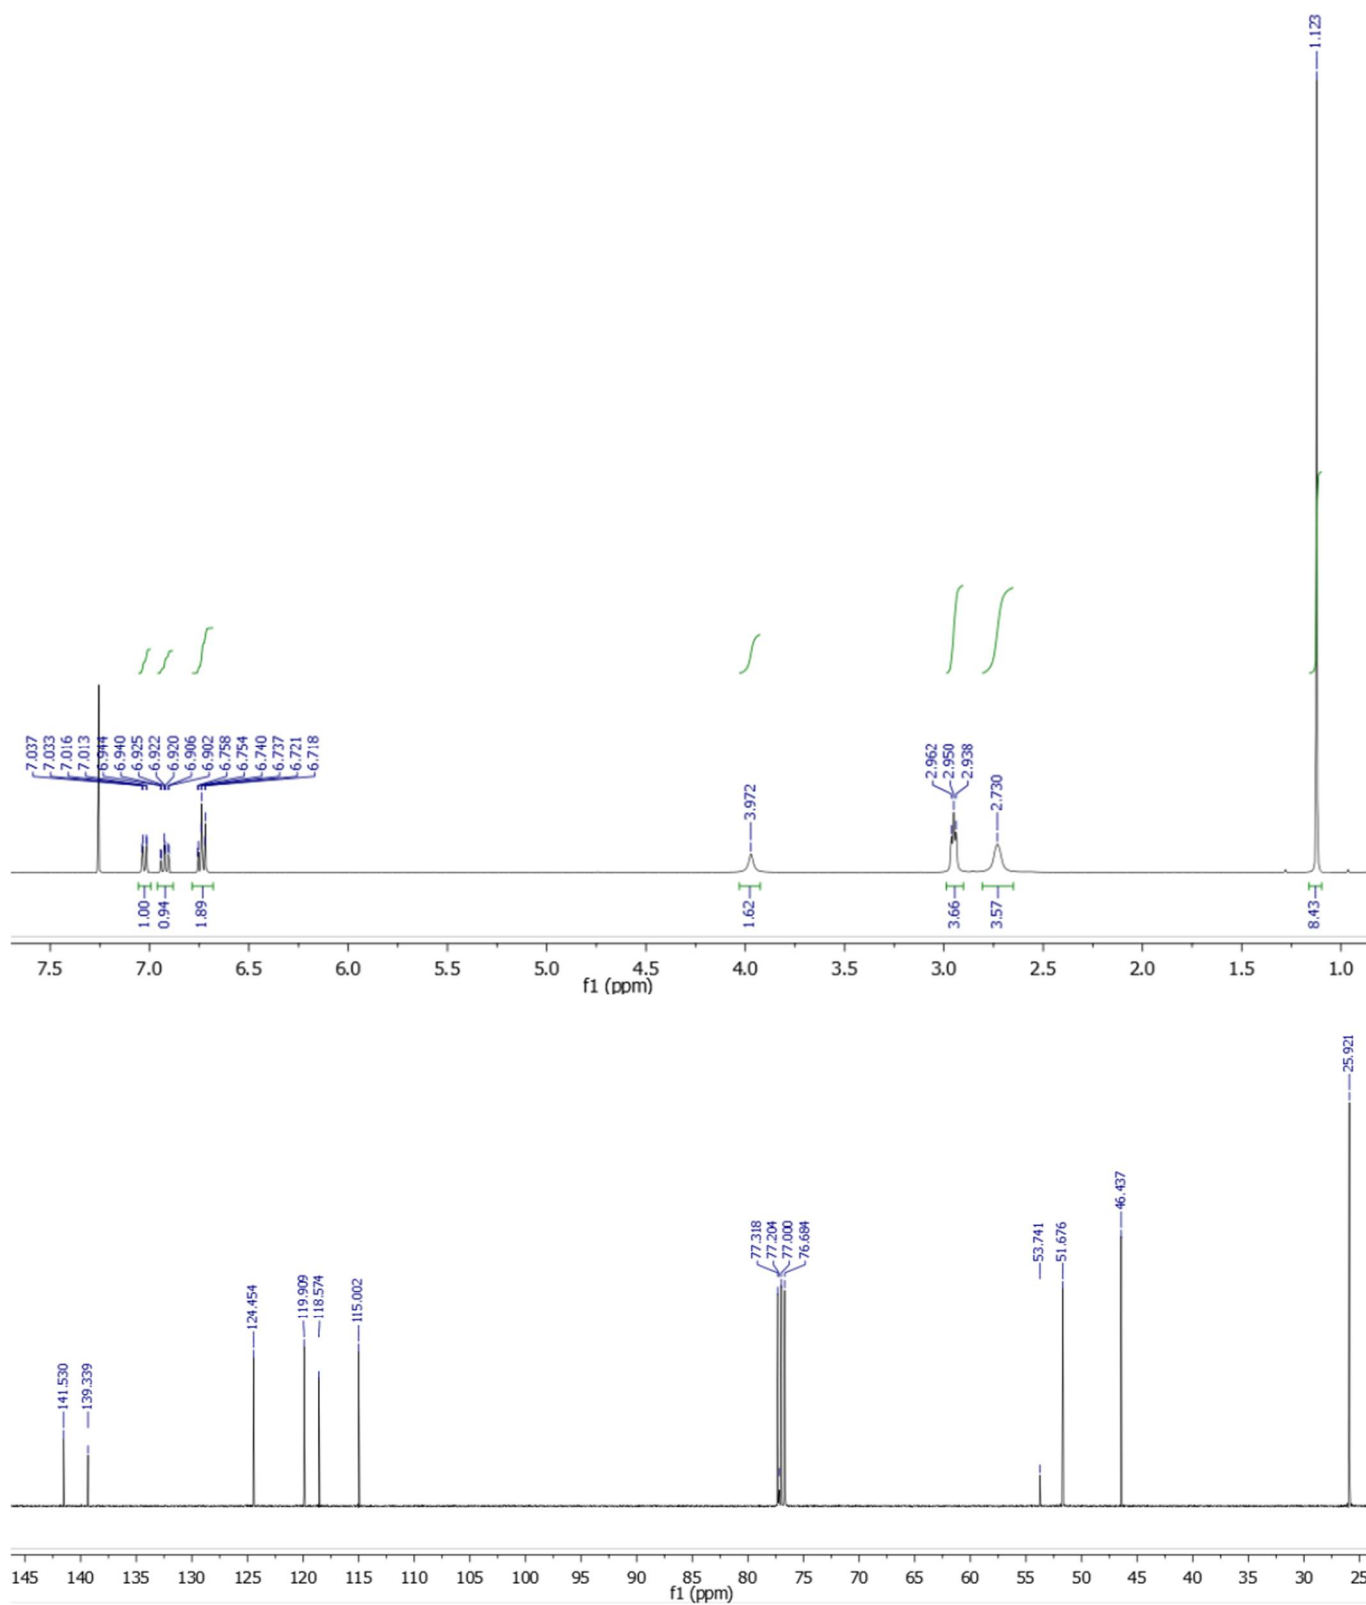

Figure S22. <sup>1</sup>H NMR at 400 MHz and <sup>13</sup>C NMR at 100 MHz spectra for compound 31

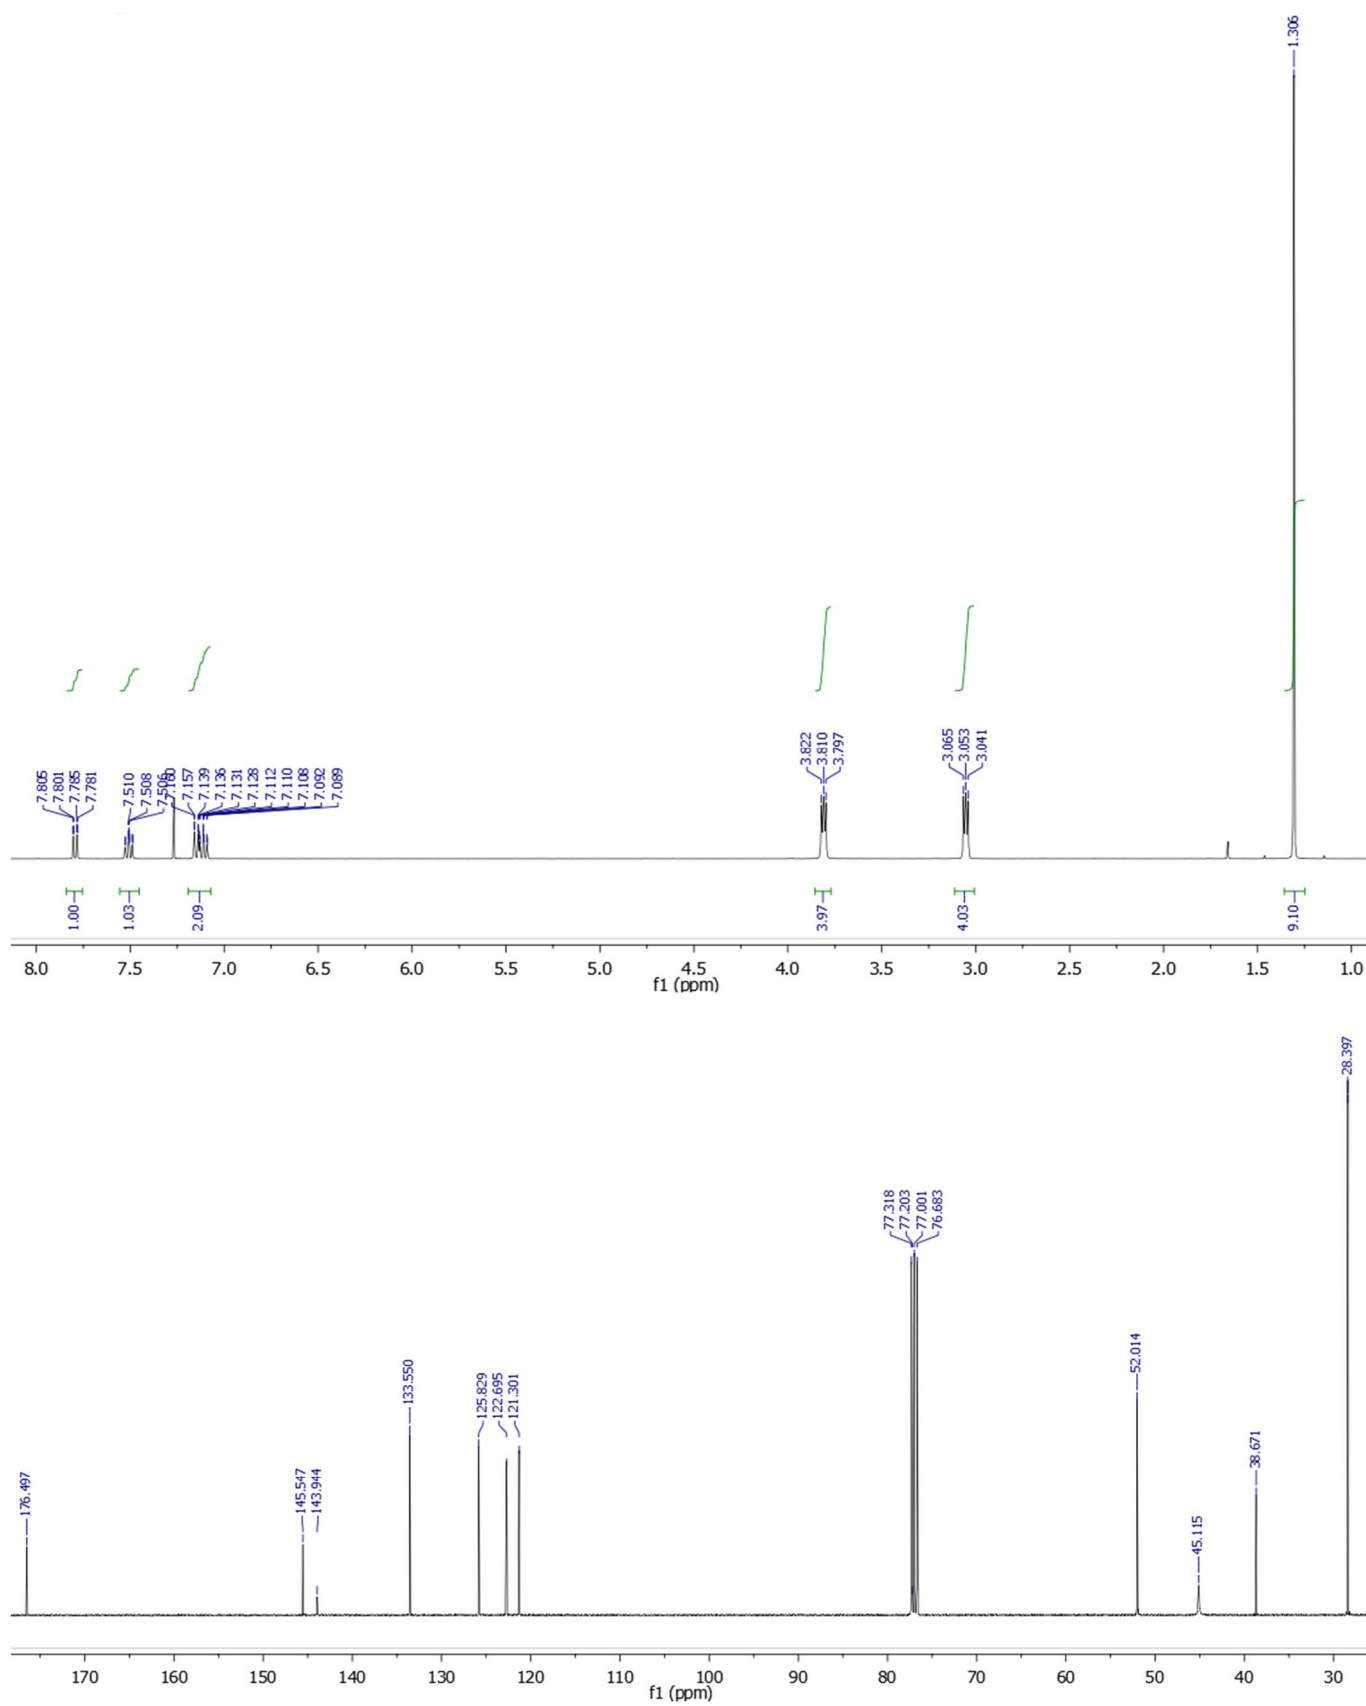

Figure S23. <sup>1</sup>H NMR at 400 MHz and <sup>13</sup>C NMR at 100 MHz spectra for compound 33

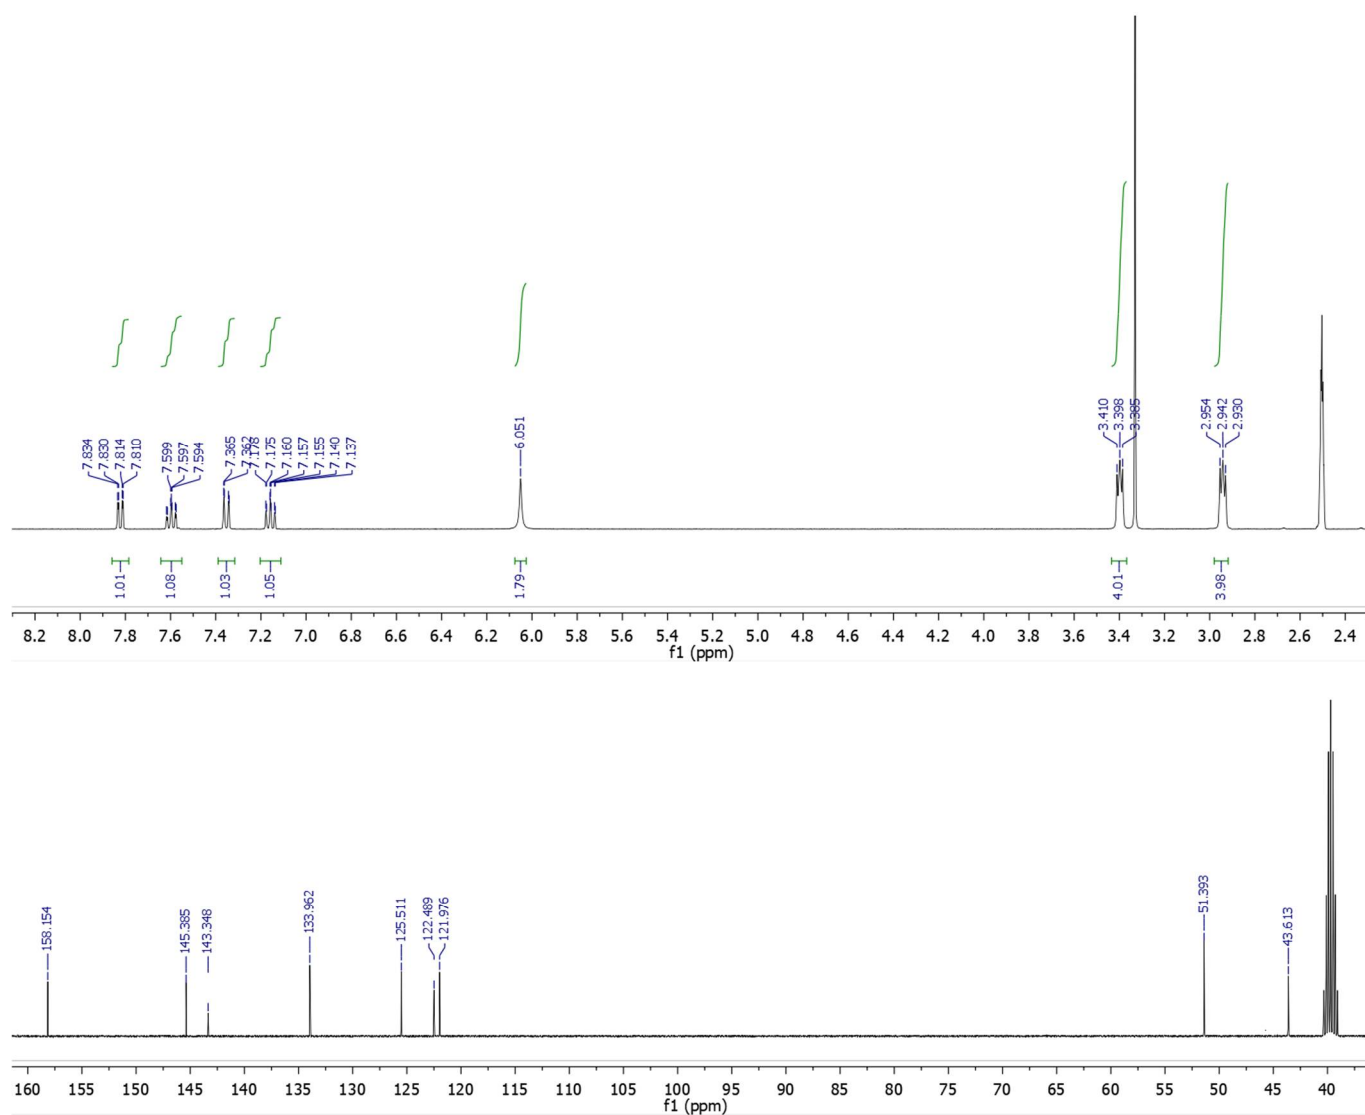



Figure S24.  $^1\text{H}$  NMR at 400 MHz and  $^{13}\text{C}$  NMR at 100 MHz spectra for compound **34**

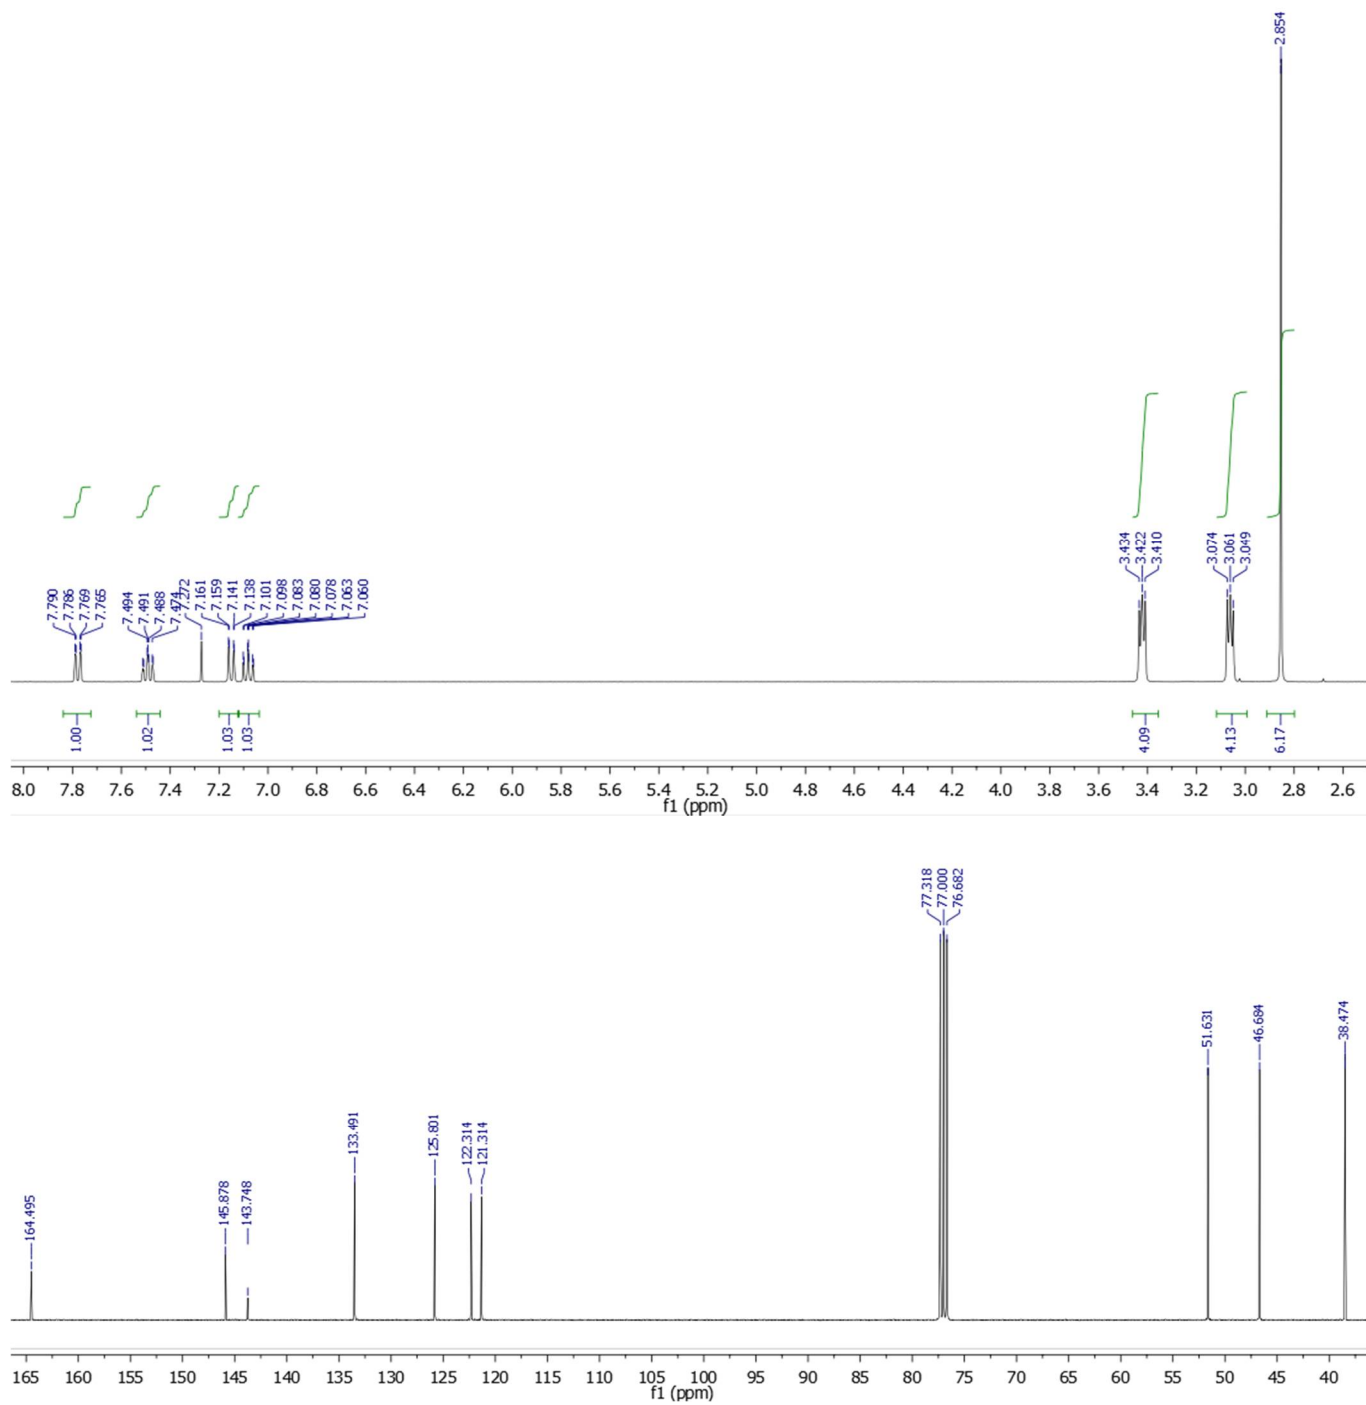

Figure S25. <sup>1</sup>H NMR at 400 MHz and <sup>13</sup>C NMR at 100 MHz spectra for compound 35

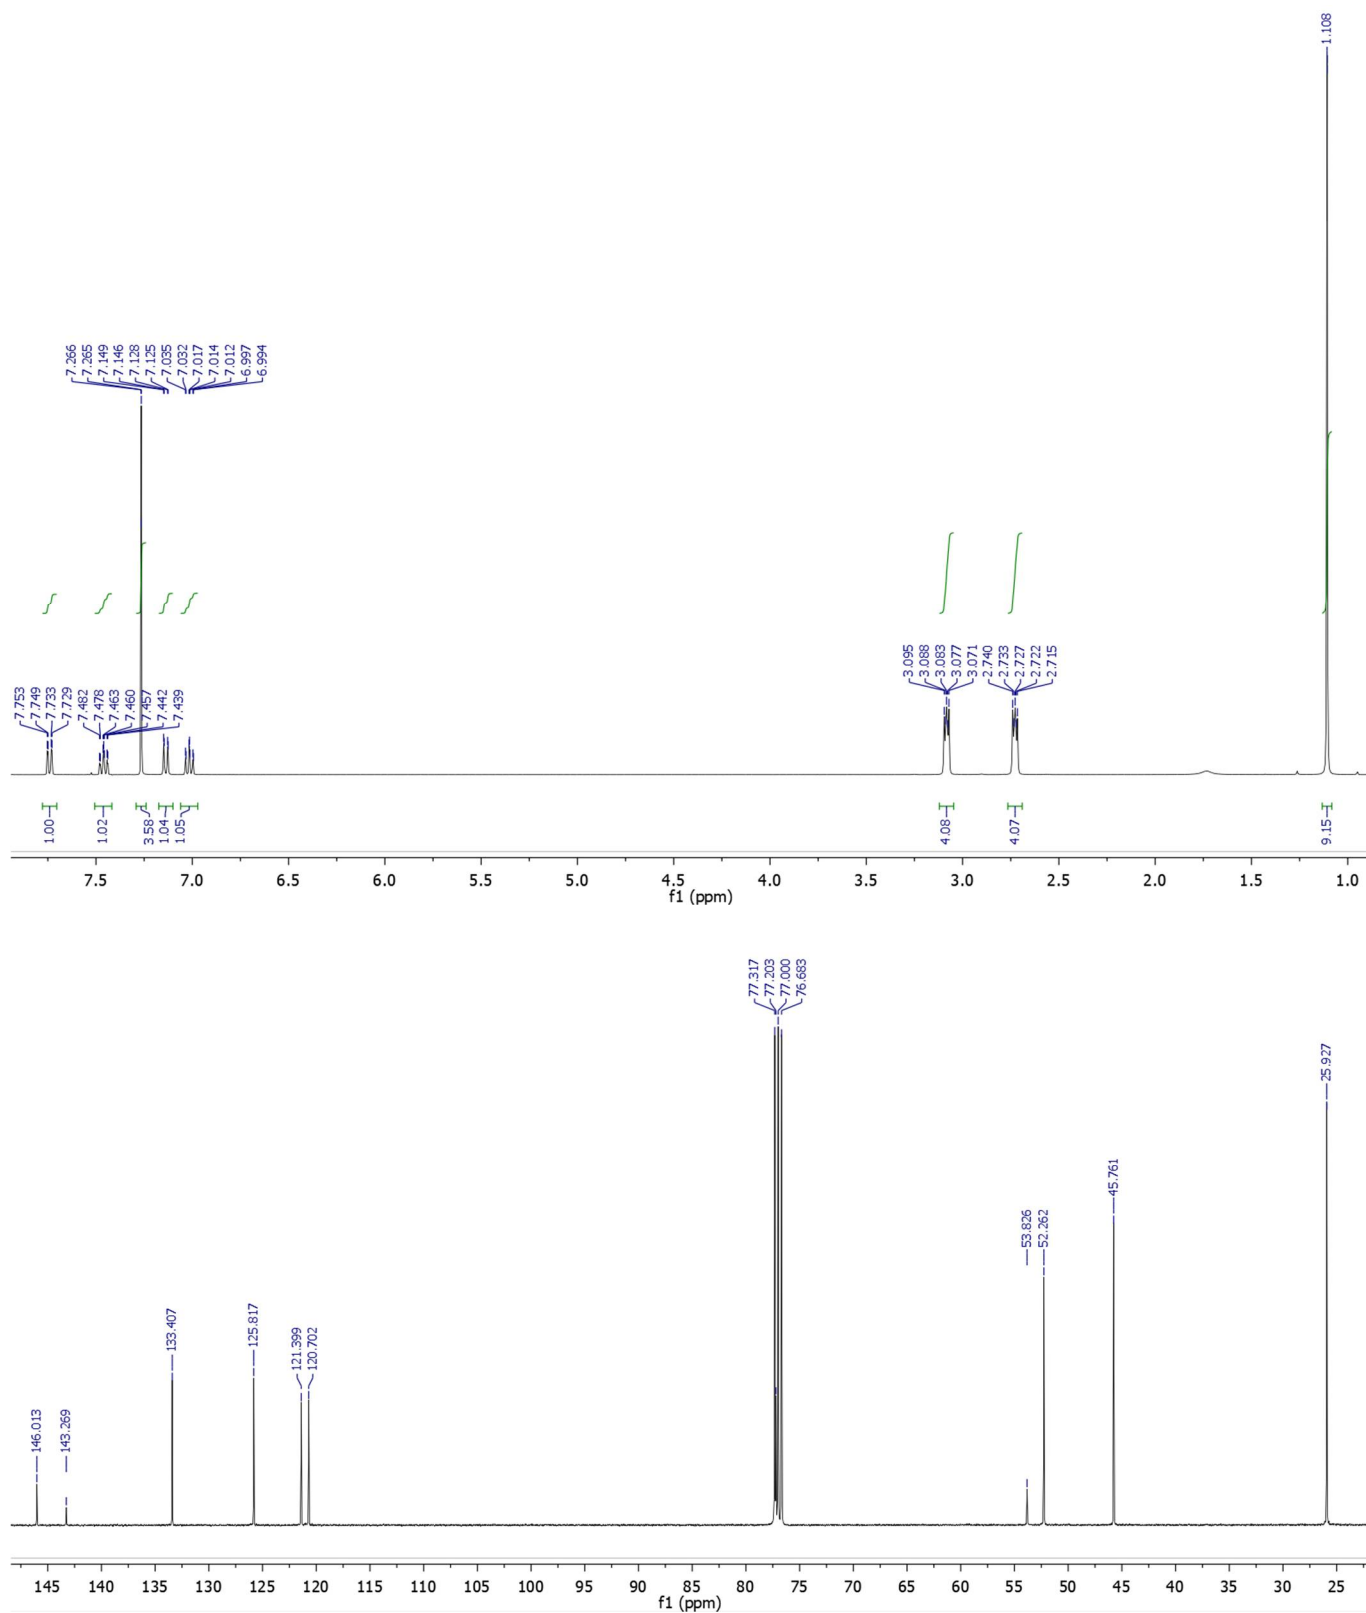

Figure S26.  $^1\text{H}$  NMR at 400 MHz and  $^{13}\text{C}$  NMR at 100 MHz spectra for compound **36**

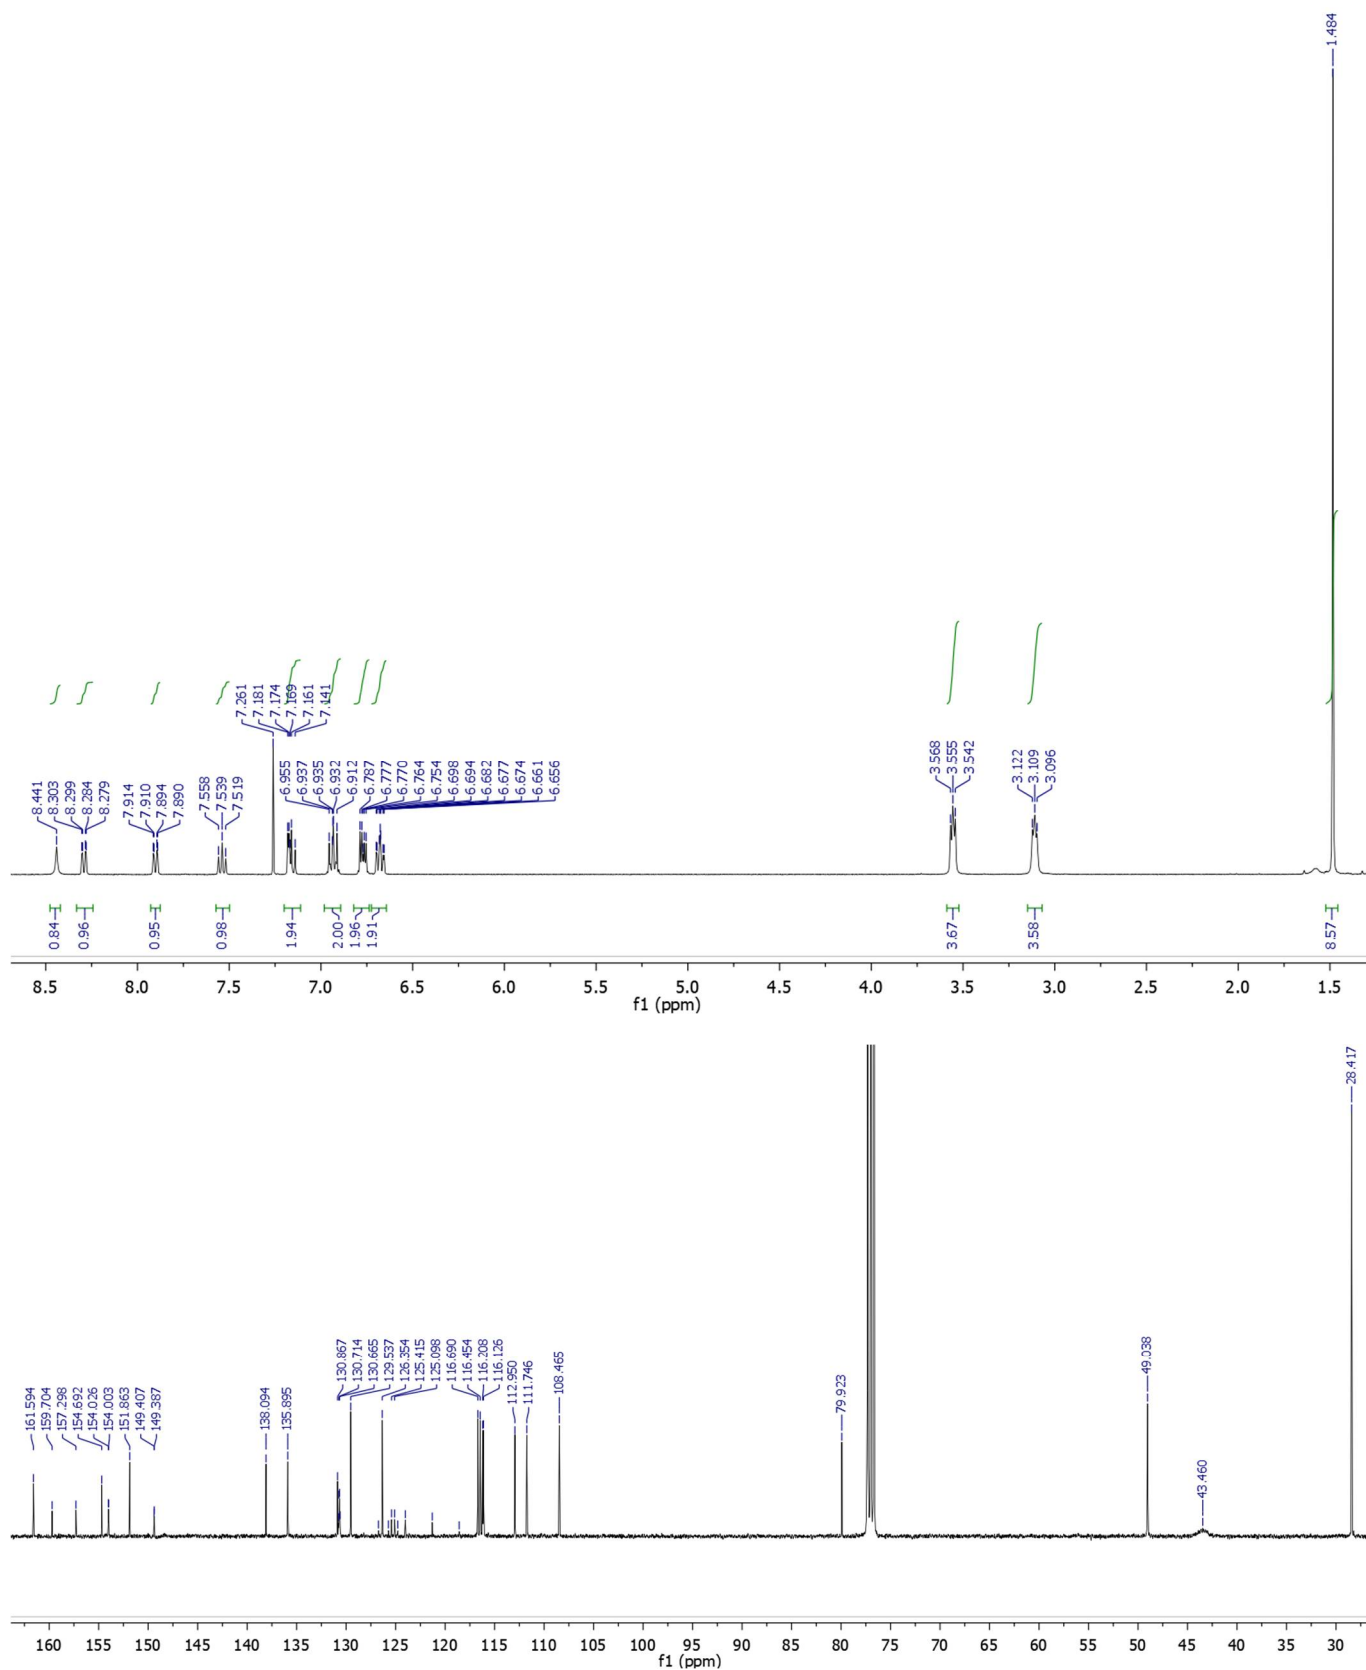

Figure S27. <sup>1</sup>H NMR at 400 MHz and <sup>13</sup>C NMR at 100 MHz spectra for compound 37

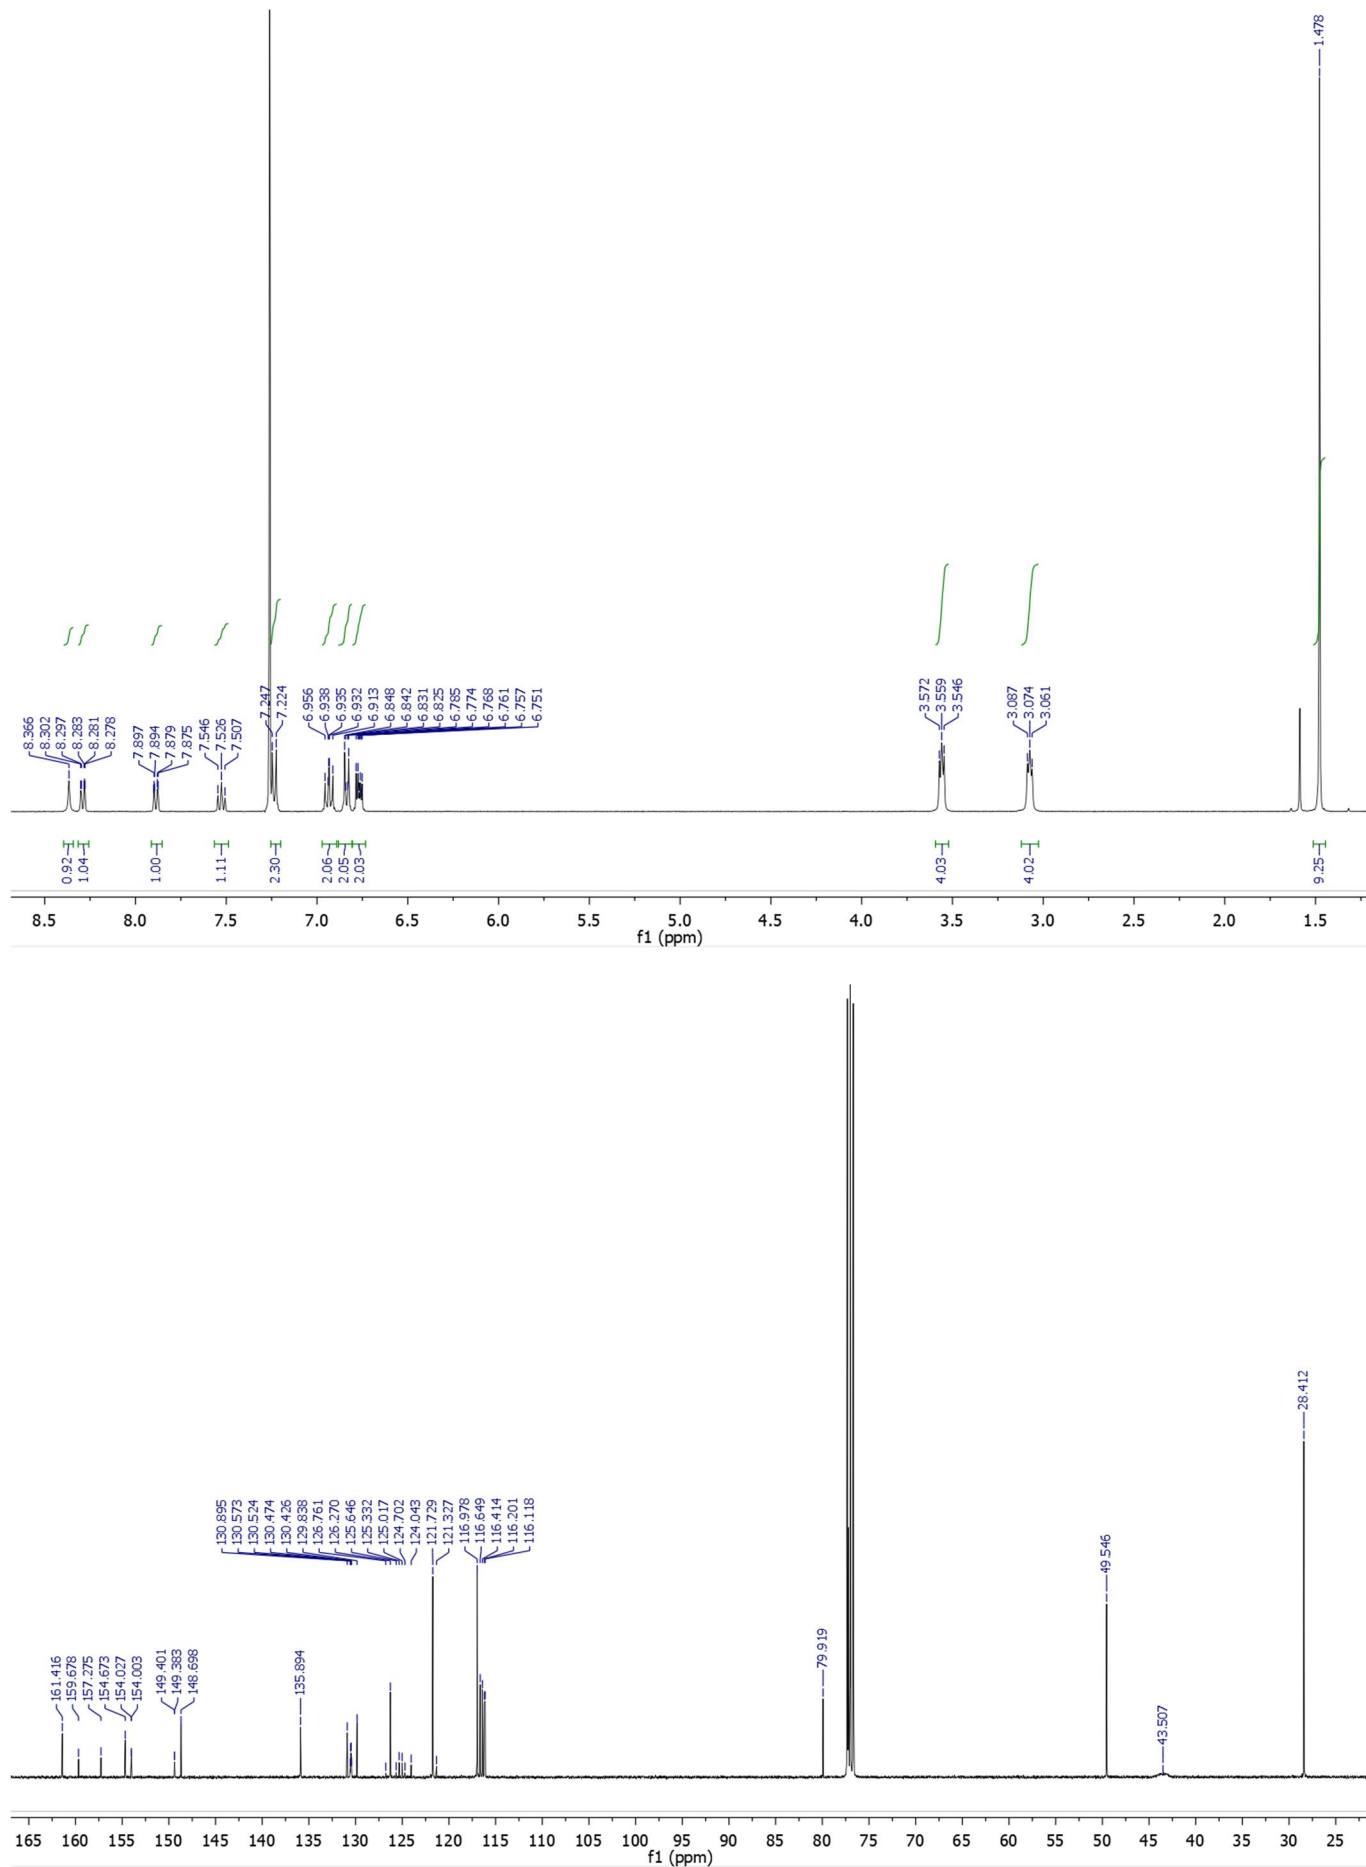

Figure S28. <sup>1</sup>H NMR at 400 MHz and <sup>13</sup>C NMR at 100 MHz spectra for compound 38

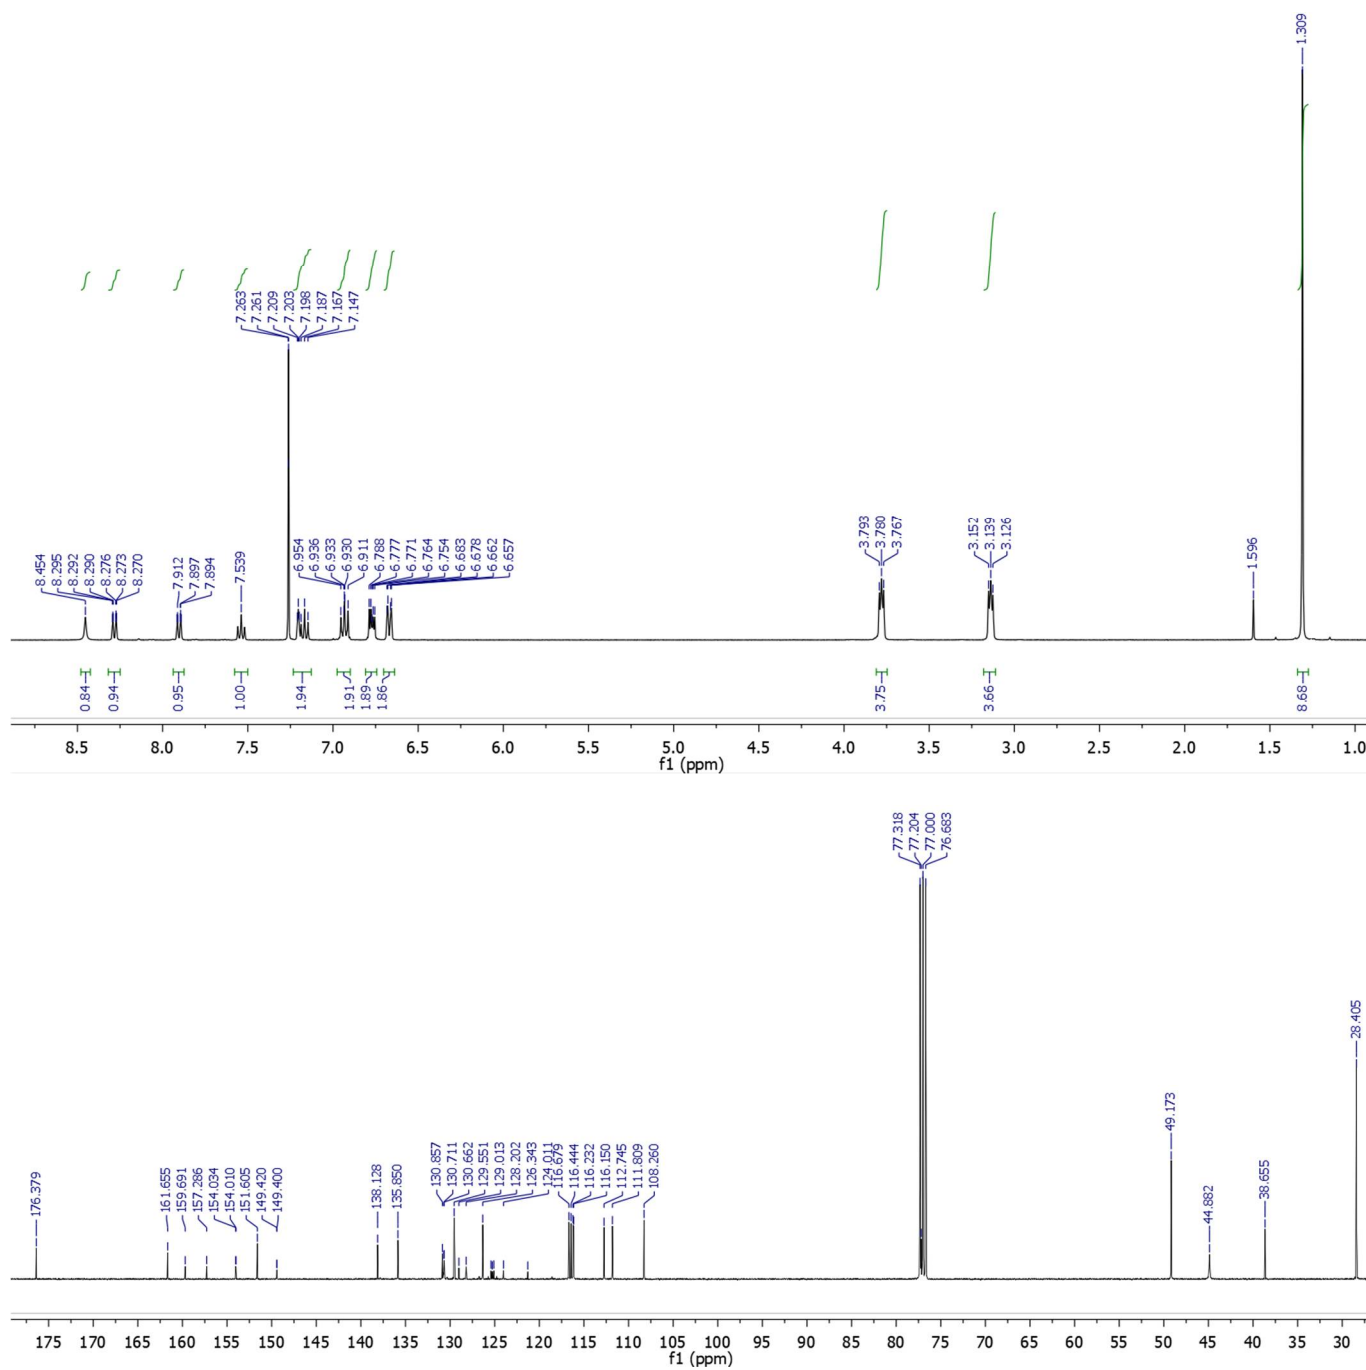

Figure S29. <sup>1</sup>H NMR at 400 MHz and <sup>13</sup>C NMR at 100 MHz spectra for compound **39**

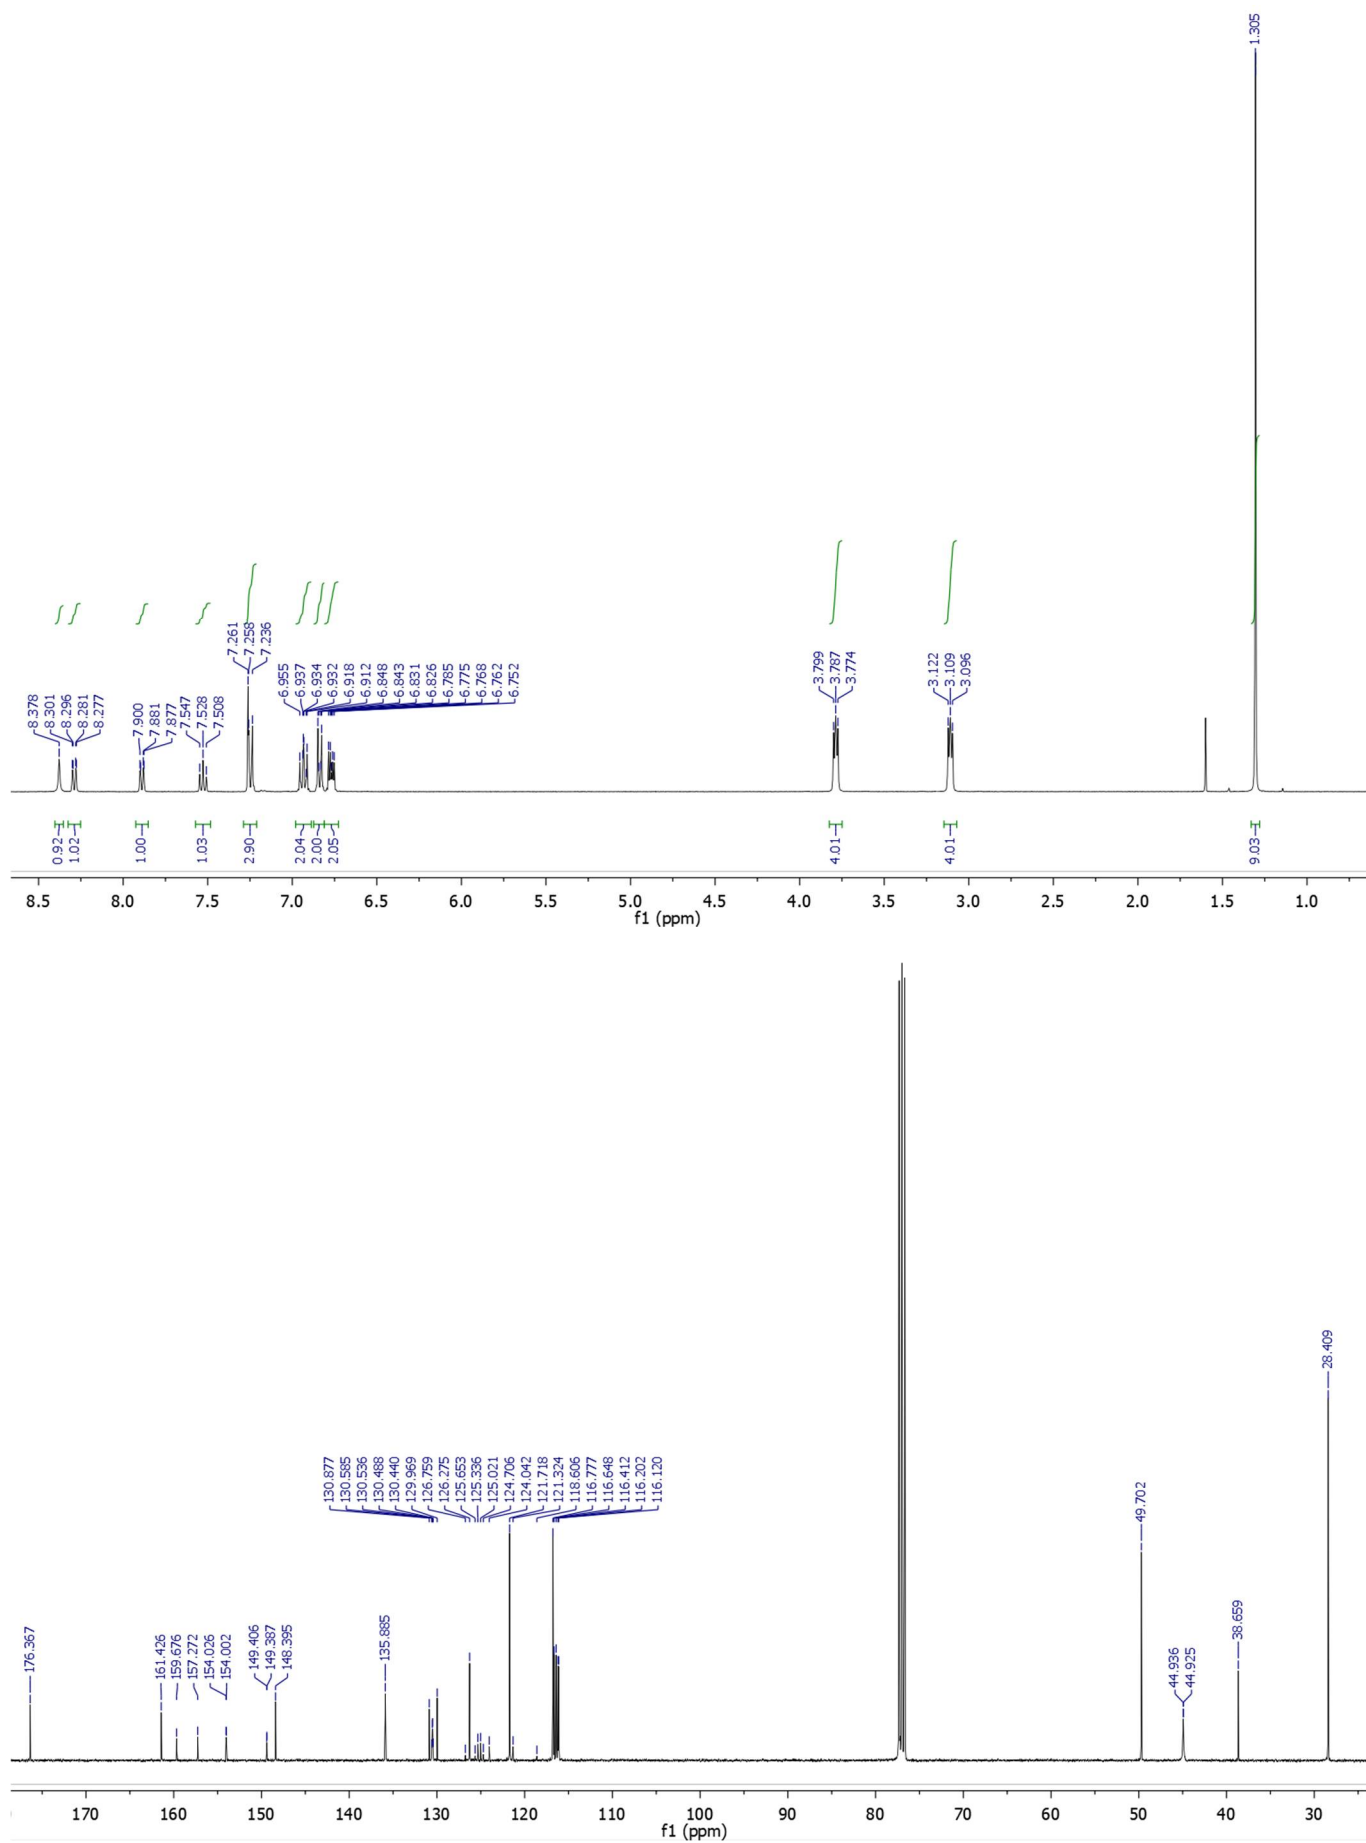

**Figure S30.** <sup>1</sup>H NMR at 400 MHz and <sup>13</sup>C NMR at 100 MHz spectra for compound **42**

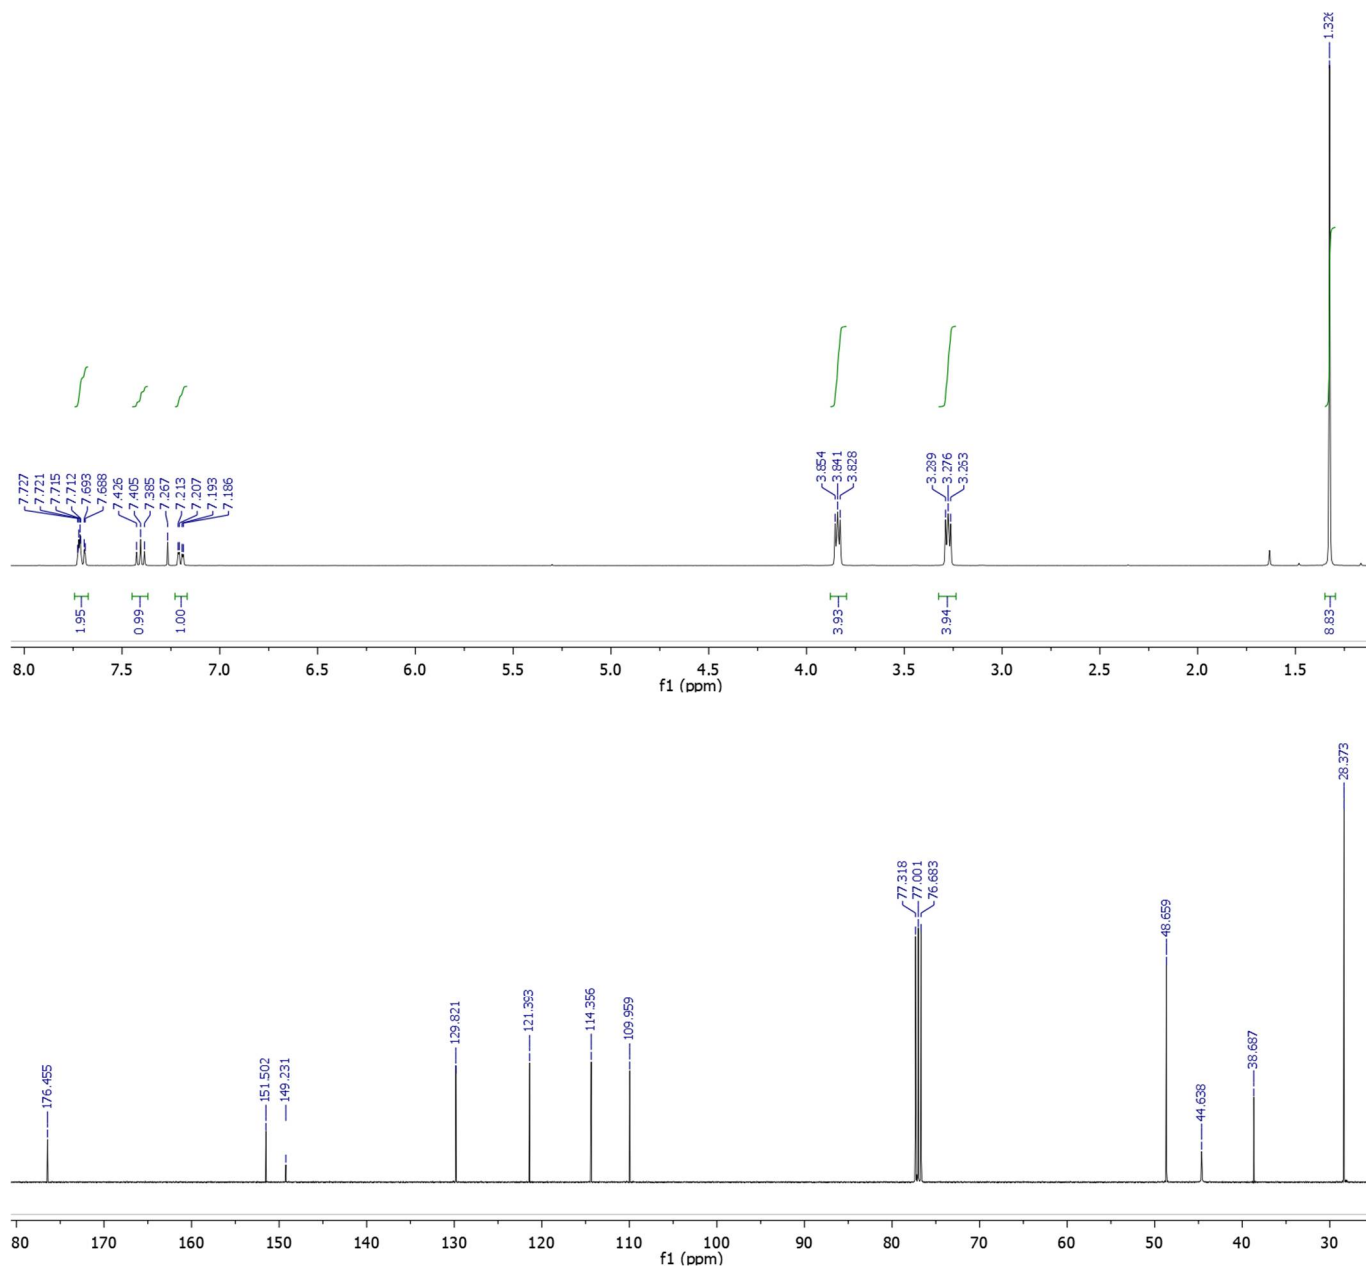

**Figure S31.**  $^1\text{H}$  NMR at 400 MHz and  $^{13}\text{C}$  NMR at 100 MHz spectra for compound **43**

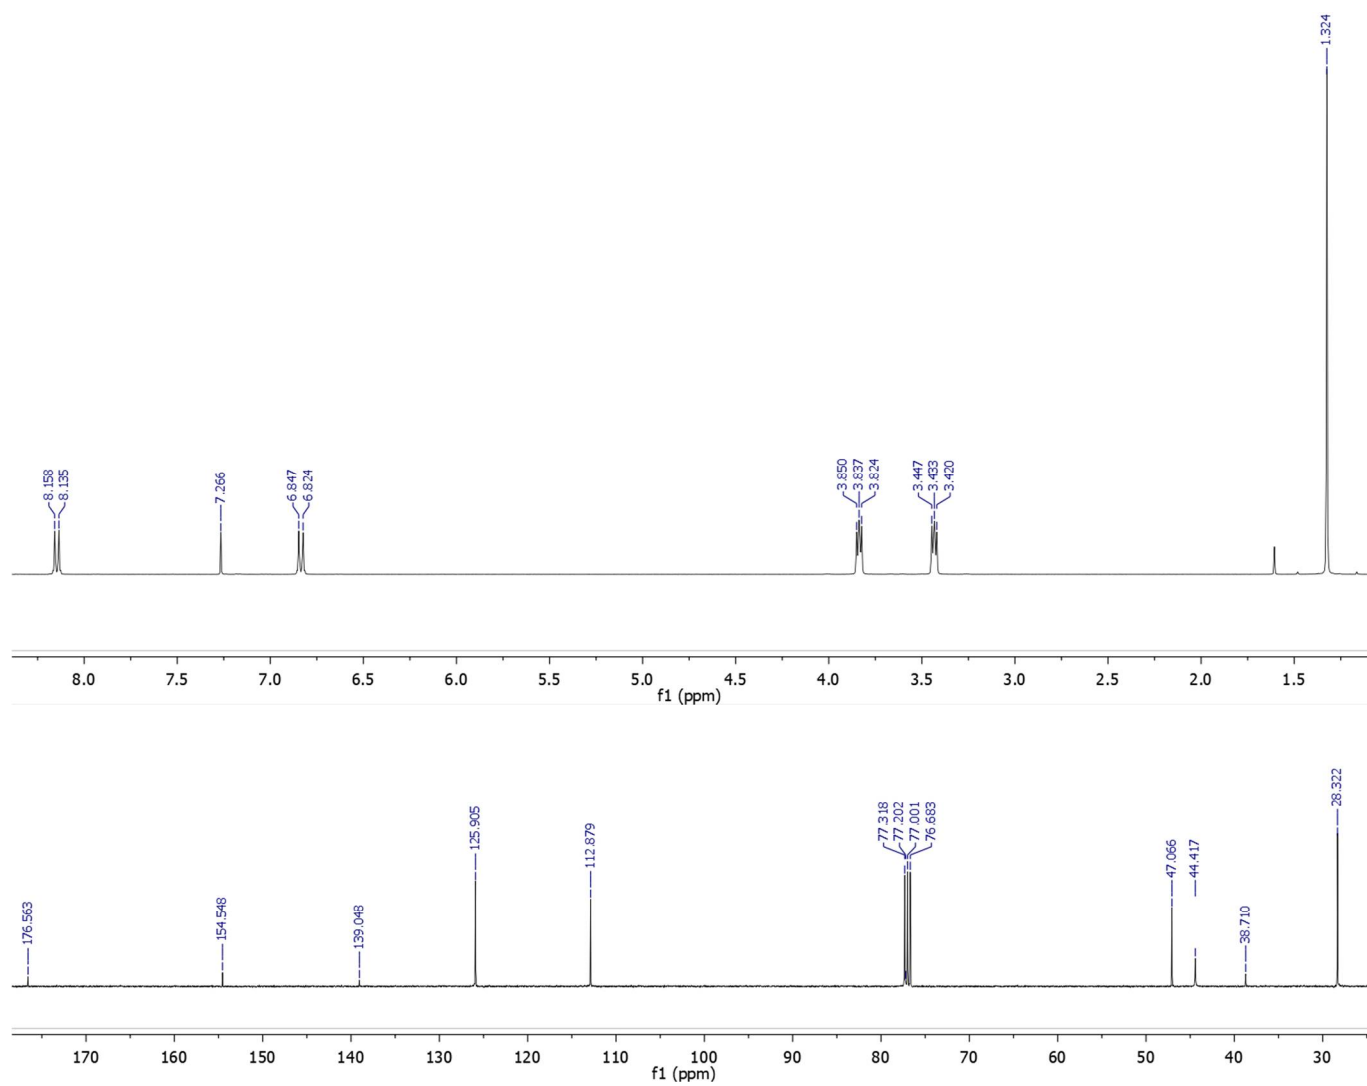



Figure S32. <sup>1</sup>H NMR at 400 MHz and <sup>13</sup>C NMR at 100 MHz spectra for compound 47

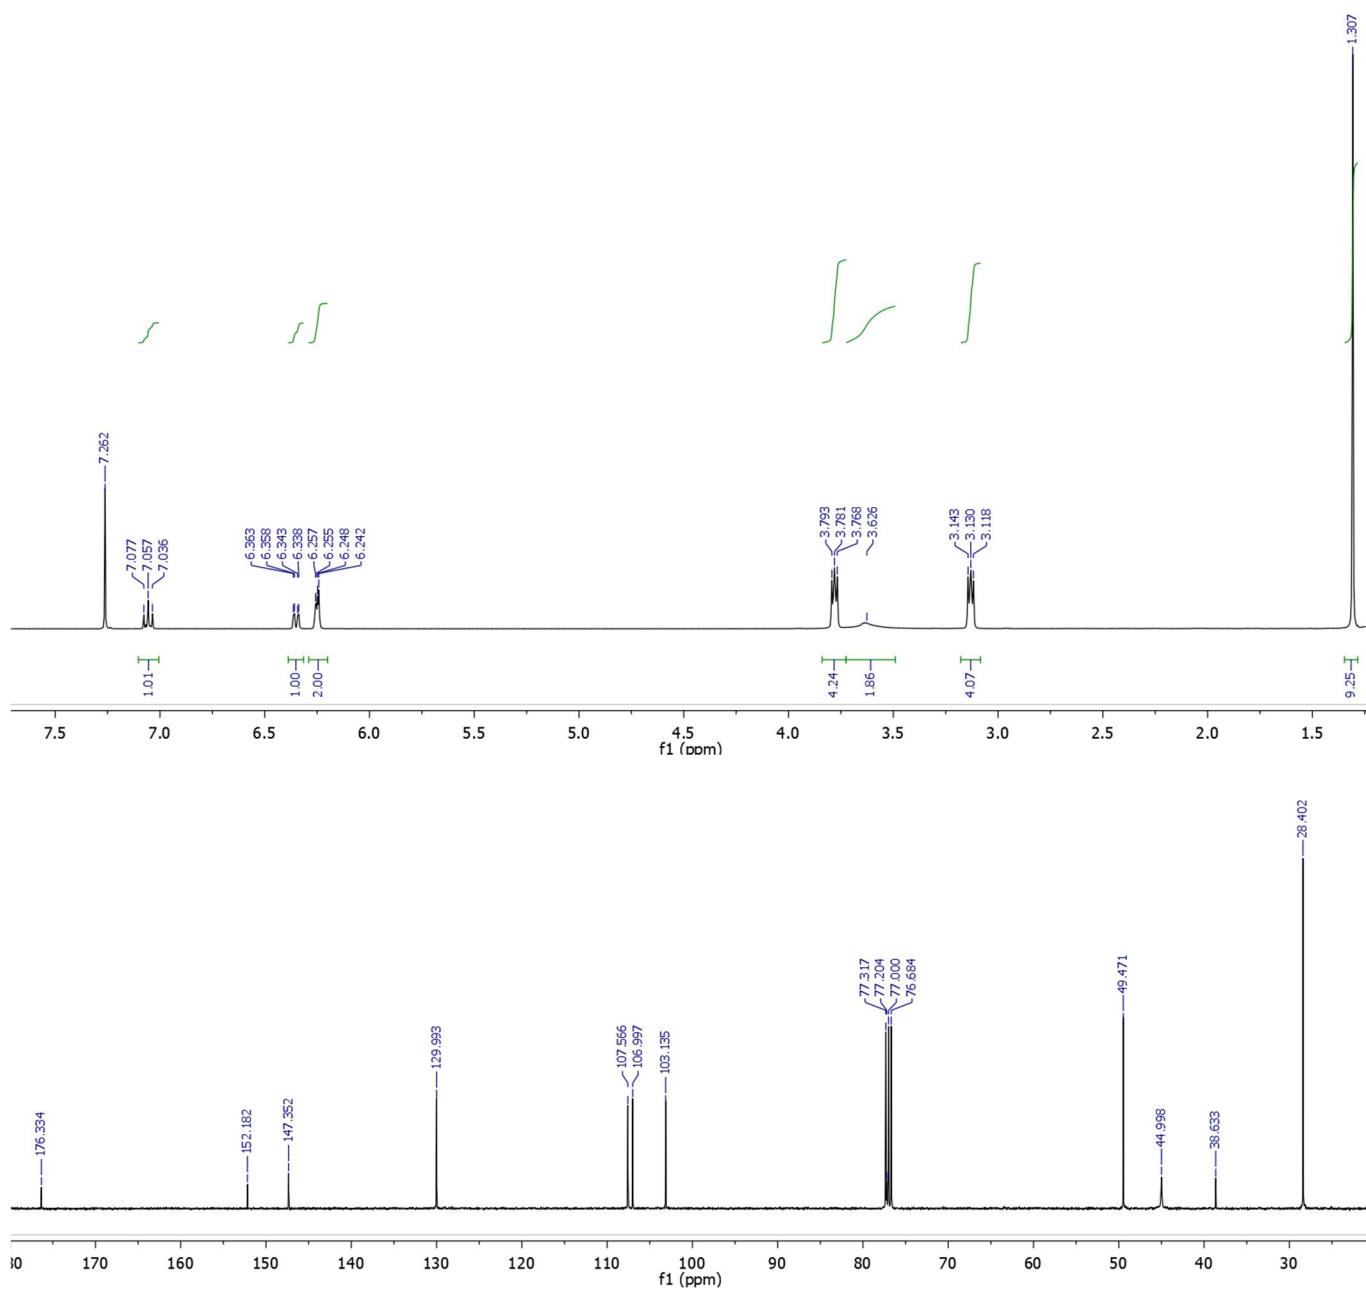

Figure S33.  $^1\text{H}$  NMR at 400 MHz and  $^{13}\text{C}$  NMR at 100 MHz spectra for compound **49**

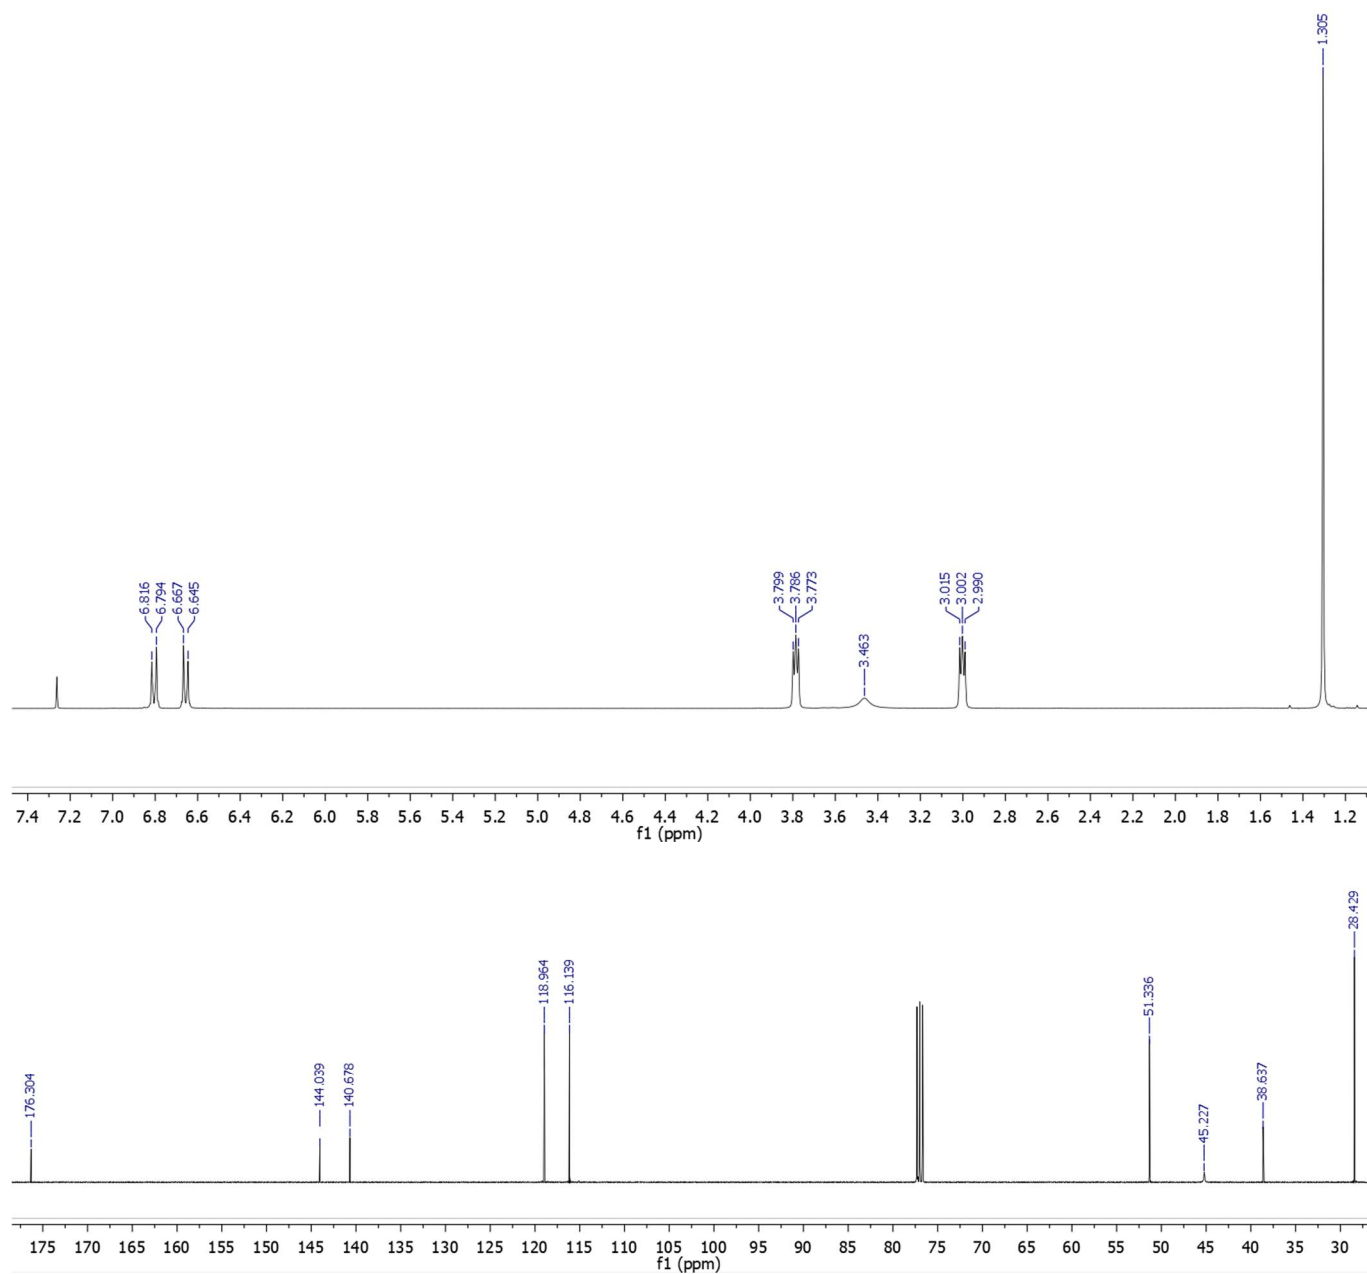

Figure S34. <sup>1</sup>H NMR at 400 MHz and <sup>13</sup>C NMR at 100 MHz spectra for compound 50

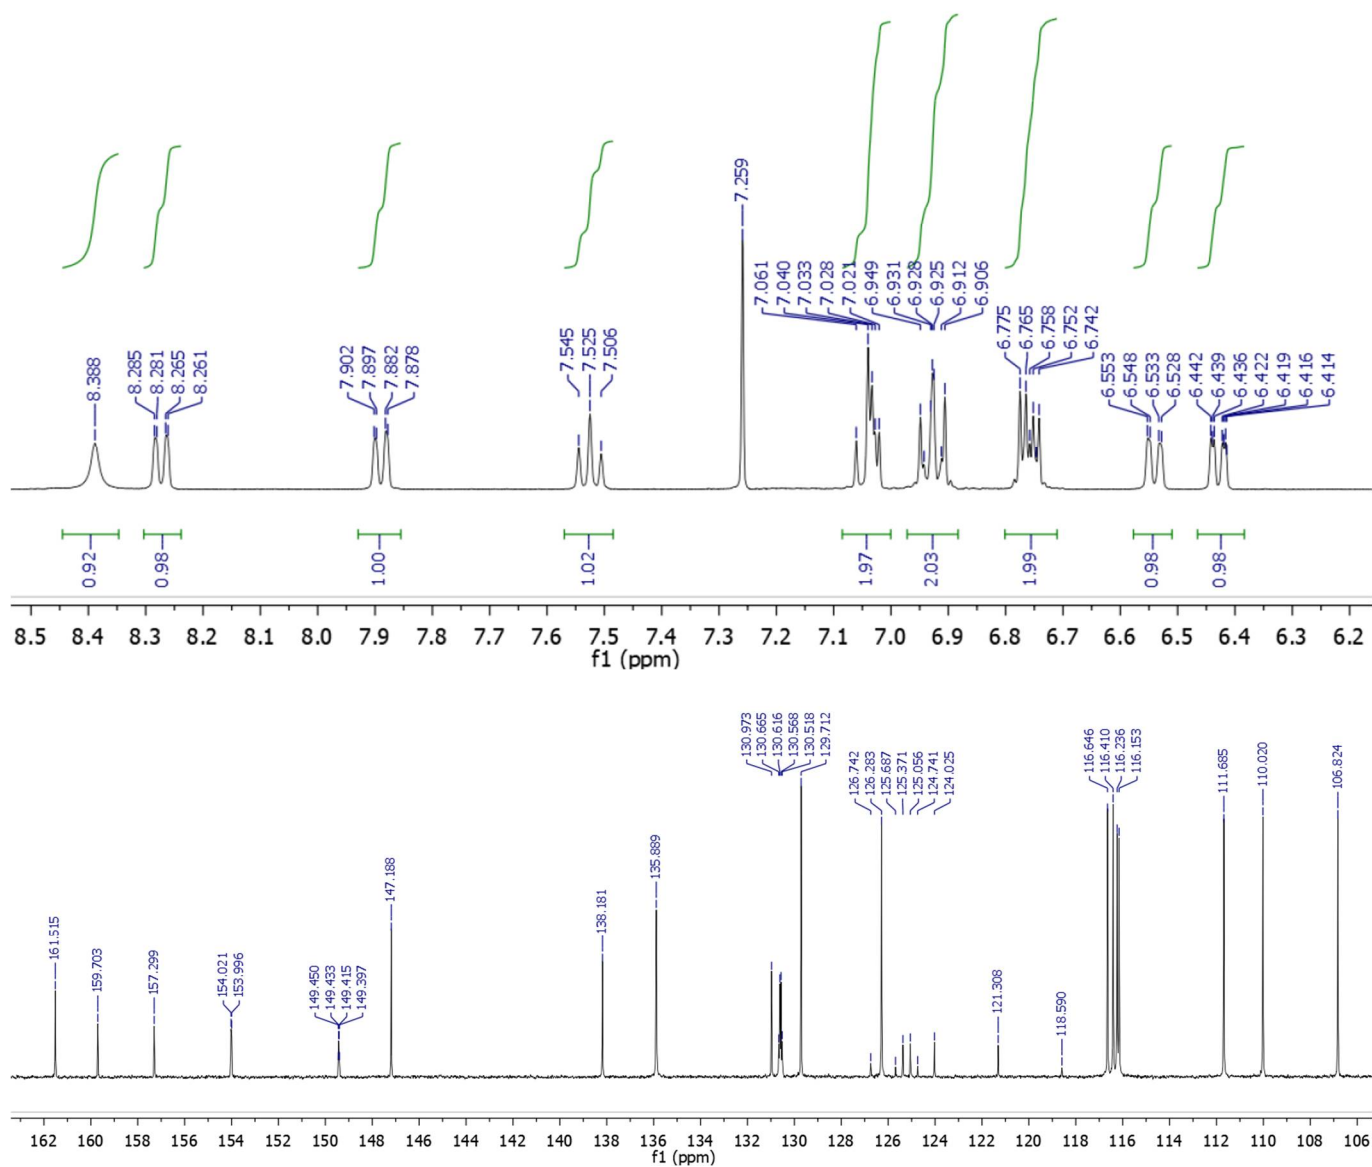

Figure S35. <sup>1</sup>H NMR at 400 MHz and <sup>13</sup>C NMR at 100 MHz spectra for compound 51

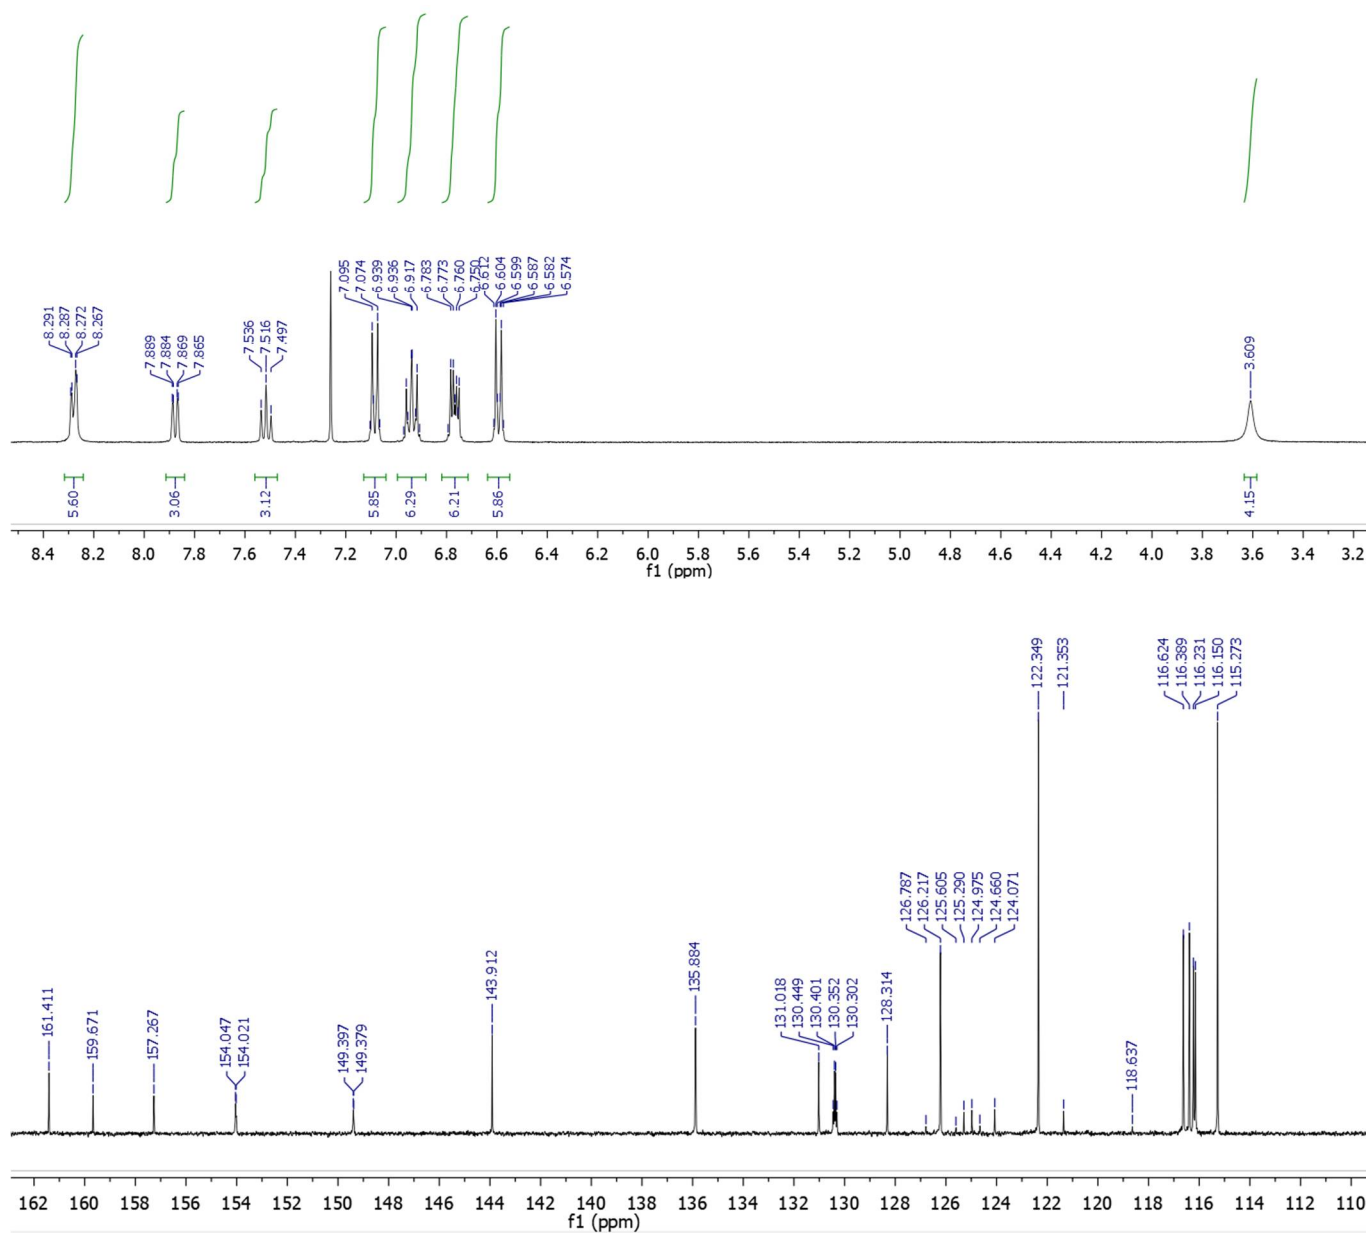

Figure S36. <sup>1</sup>H NMR at 400 MHz and <sup>13</sup>C NMR at 100 MHz spectra for compound 52

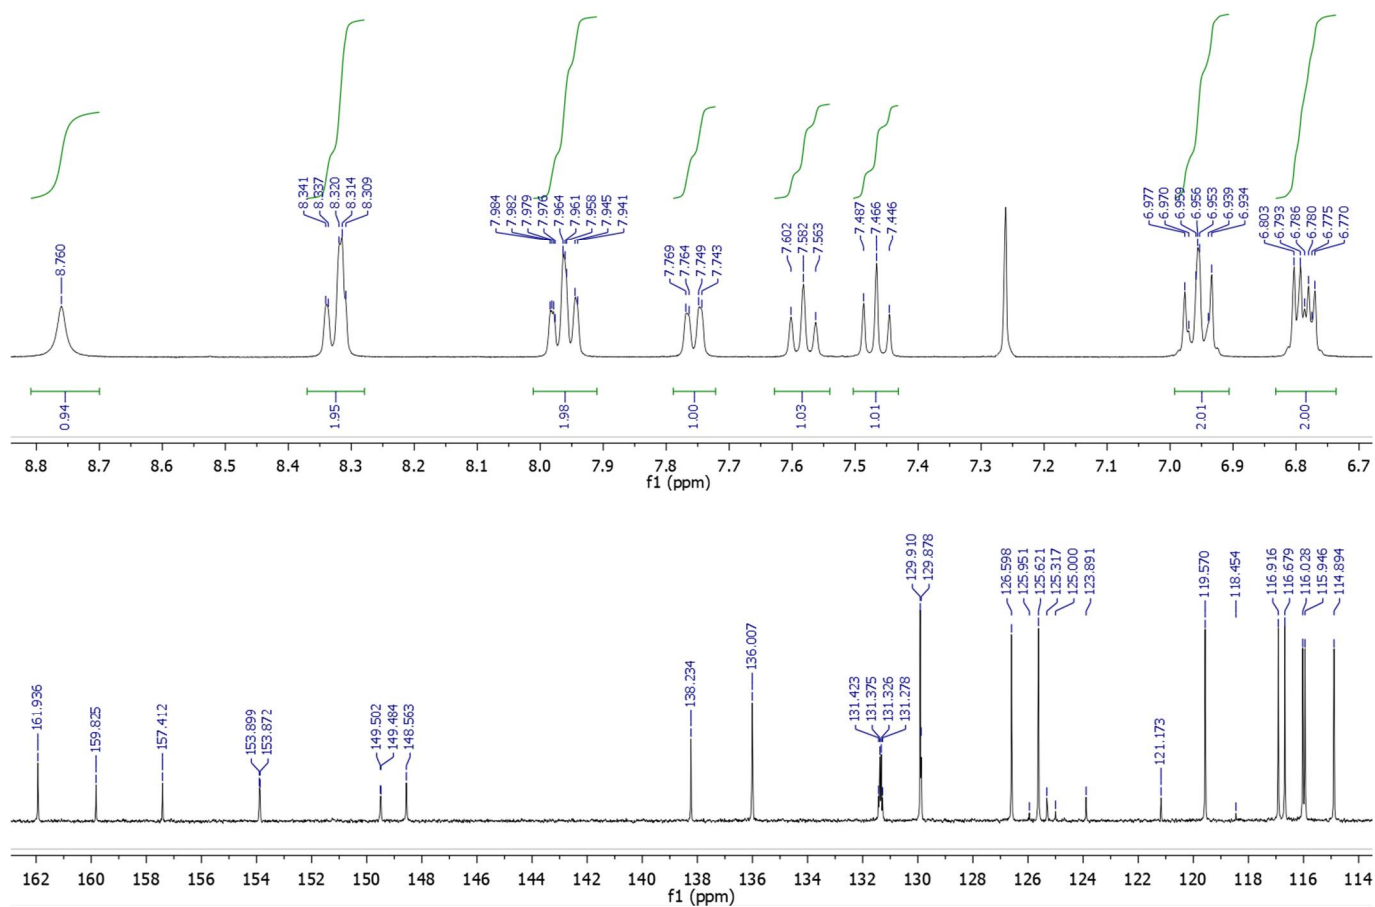

Figure S37. <sup>1</sup>H NMR at 400 MHz and <sup>13</sup>C NMR at 100 MHz spectra for compound 53

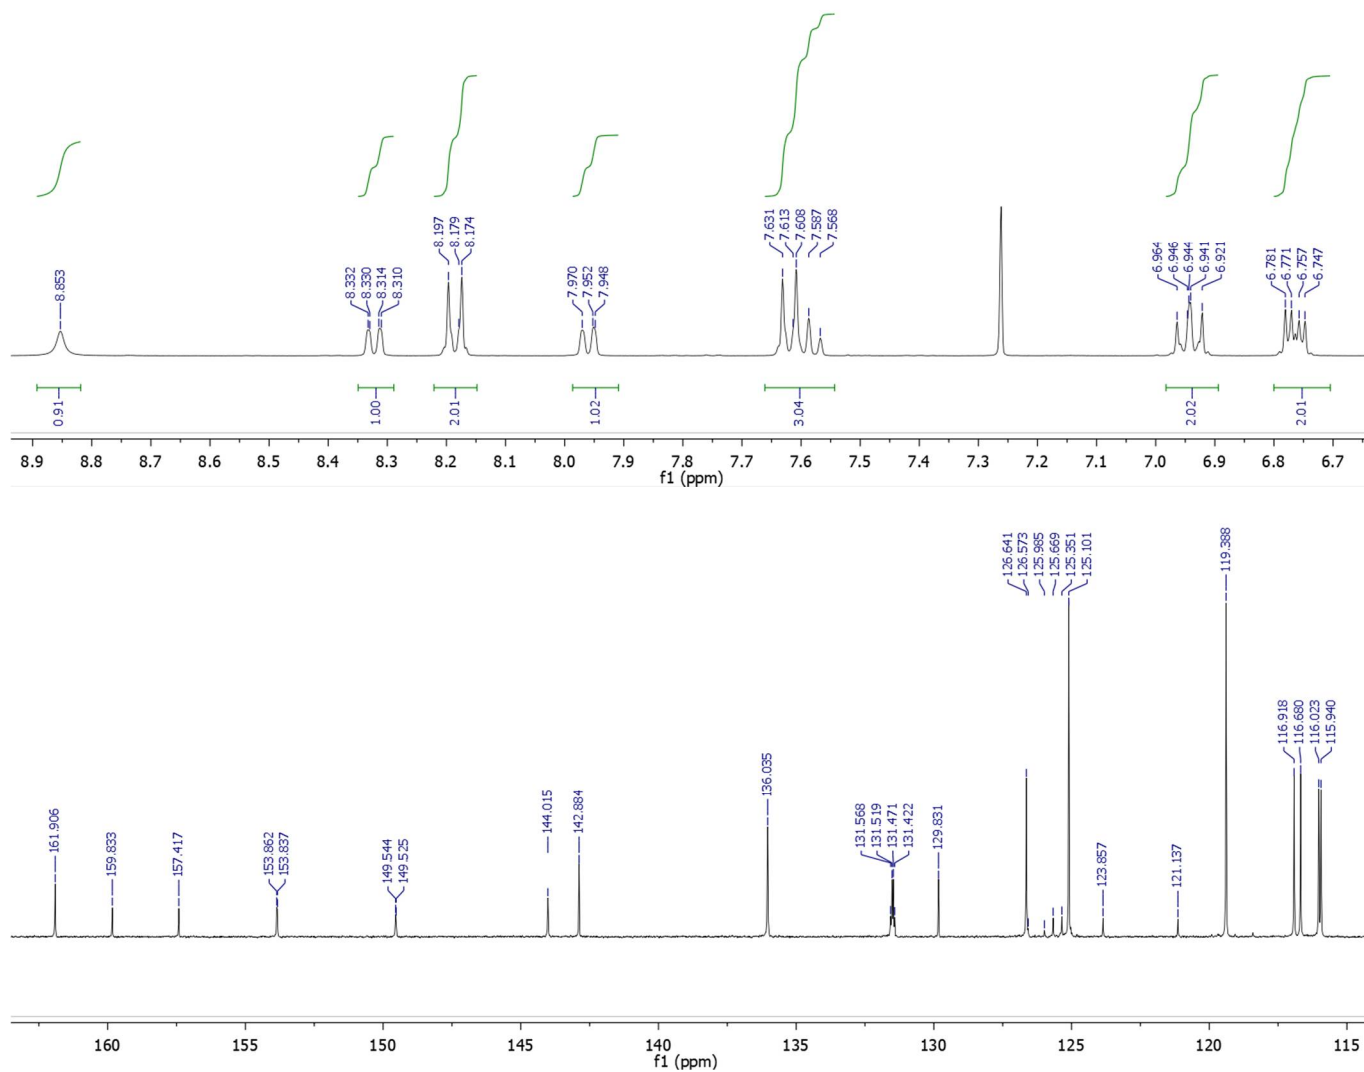

Figure S38. <sup>1</sup>H NMR at 400 MHz and <sup>13</sup>C NMR at 100 MHz spectra for compound 54

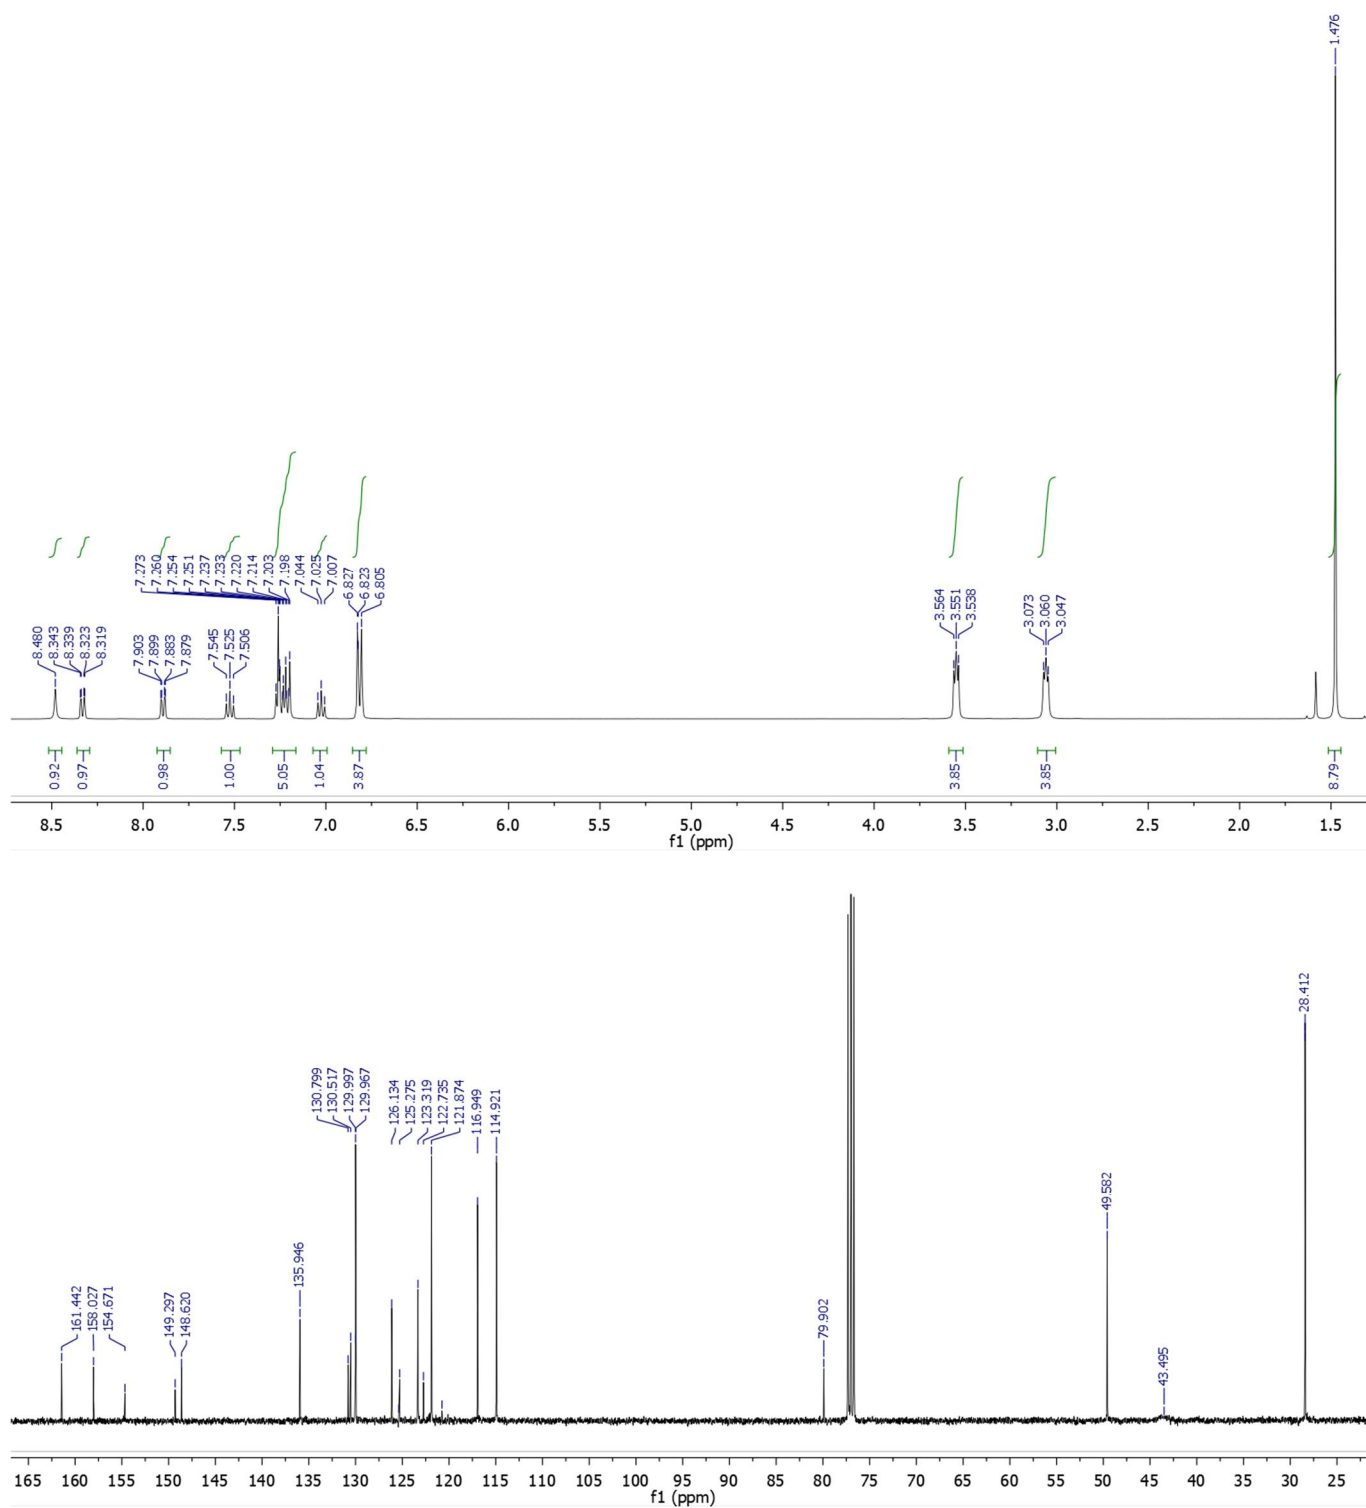

Figure S39. <sup>1</sup>H NMR at 400 MHz and <sup>13</sup>C NMR at 100 MHz spectra for compound 55

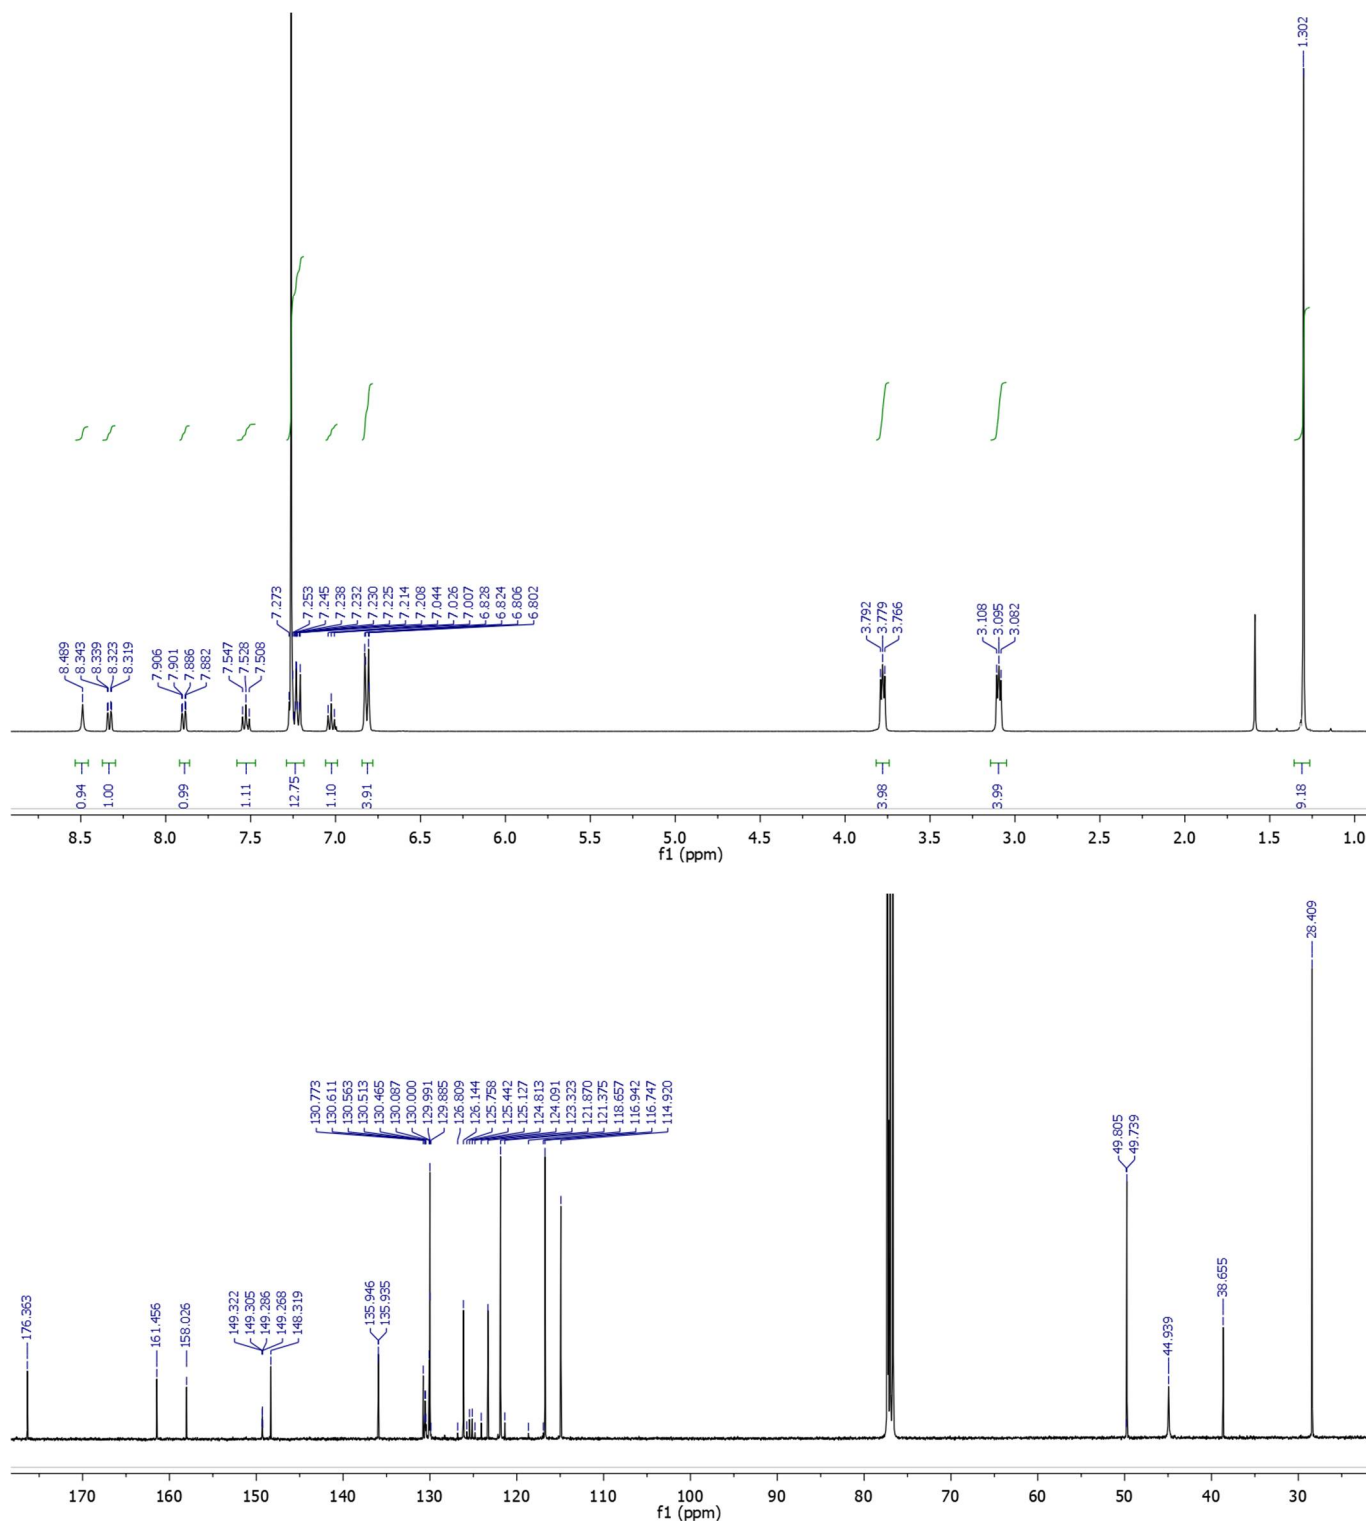



**Figure S40.**  $^1\text{H}$  NMR at 400 MHz and  $^{13}\text{C}$  NMR at 100 MHz spectra for compound **56**

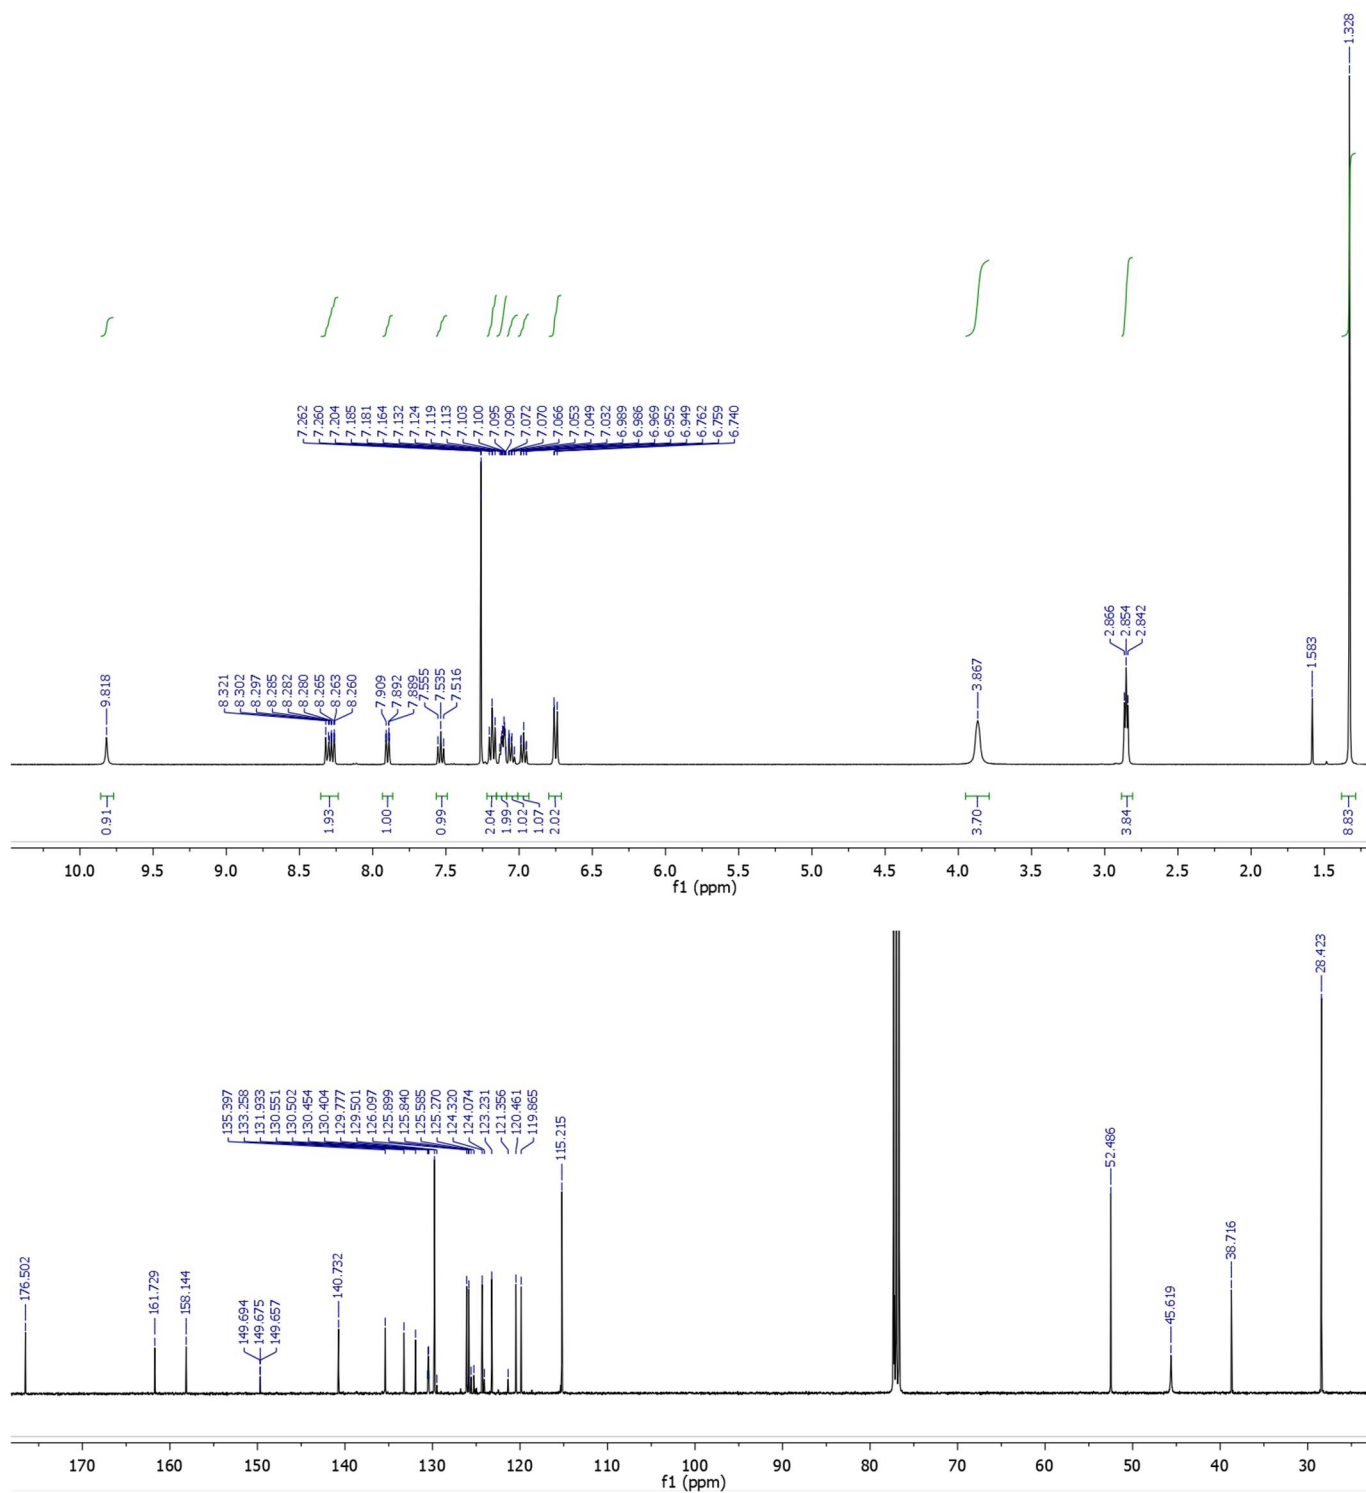

Supplement: s1 [file s1]
